# Supplementary material for: Clonal hematopoiesis is associated with increased risk of progression of asymptomatic Waldenström macroglobulinemia
Source: PubMed Central journal article supplement — Blood Adv. 2022 Apr 1;6(7):2230–5. doi: 10.1182/bloodadvances.2021004926 (PMC9006277; doi:10.1182/bloodadvances.2021004926), 2022-04-01

**Clonal hematopoiesis is associated with increased risk of progression of asymptomatic Waldenström Macroglobulinemia.**

Tahri et al.

## SUPPLEMENTARY APPENDIX

### Table of Contents

| Section   | Page                                                                                                                 |
|-----------|----------------------------------------------------------------------------------------------------------------------|
| Methods   | Supplementary Methods                                                                                                |
| Methods   | 3                                                                                                                    |
| Table S1  | List of genes and exons targeted by the clinical NGS assay                                                           |
| Table S1  | 4                                                                                                                    |
| Table S2  | List of queried genes and variants from NGS assay                                                                    |
| Table S2  | 7                                                                                                                    |
| Table S3  | Patient characteristics of symptomatic Waldenström Macroglobulinemia cohort                                          |
| Table S3  | 22                                                                                                                   |
| Table S4  | Hematologic and immunologic parameters of patients at NGS                                                            |
| Table S4  | 27                                                                                                                   |
| Table S5  | Patient characteristics of 26 Waldenström Macroglobulinemia patients with <i>TP53</i> mutation                       |
| Table S5  | 31                                                                                                                   |
| Table S6  | Patient characteristics of asymptomatic Waldenström Macroglobulinemia cohort                                         |
| Table S6  | 34                                                                                                                   |
| Table S7  | Patient characteristics of 15 Waldenström Macroglobulinemia patients with SPM                                        |
| Table S7  | 38                                                                                                                   |
| Table S8  | List of treatment received at any point and pre-NGS.                                                                 |
| Table S8  | 42                                                                                                                   |
| Figure S1 | Study workflow                                                                                                       |
| Figure S1 | 44                                                                                                                   |
| Figure S2 | Mutational properties                                                                                                |
| Figure S2 | 45                                                                                                                   |
| Figure S3 | Mutational spectrum of all detected mutations patients with Waldenström Macroglobulinemia at time of NGS assay       |
| Figure S3 | 46                                                                                                                   |
| Figure S4 | Correlation BM infiltration and <i>MYD88</i> status with CH-DTA detection in Waldenström Macroglobulinemia patients. |
| Figure S4 | 47                                                                                                                   |
| Figure S5 | Mutational spectrum in patients with IgM MGUS and smoldering Waldenström Macroglobulinemia                           |
| Figure S5 | 48                                                                                                                   |
| Figure S6 | CH dynamics                                                                                                          |
| Figure S6 | 49                                                                                                                   |
| Figure S7 | Mutational profile and characteristics of Waldenström Macroglobulinemia patients with MDS and/or AML                 |
| Figure S7 | 52                                                                                                                   |
| Figure S8 | Mutational spectrum of CH in Waldenström Macroglobulinemia patients with <i>TP53</i> mutations.                      |
| Figure S8 | 53                                                                                                                   |

## SUPPLEMENTARY METHODS

### Statistical analysis

CH was defined as the presence of *DNMT3A*, *TET2* and *ASXL1* mutations (CH-DTA) with a variant allele frequency (VAF) of  $\geq 2\%$ . The average depth of coverage for the CH-DTA mutations (*TET2*, *DNMT3A* and *ASXL1*) was 821X. Variant detection on paired peripheral blood and bone marrow samples have been reported to be 100% on this NGS assay<sup>1</sup>. We defined IgM MGUS and SWM patients as those who were asymptomatic and had  $<10\%$  or  $>10\%$  lymphoplasmacytic cell involvement in the BM, respectively<sup>2</sup>. Bone marrow biopsies and aspirates were examined at NGS and the presence of or absence of dysplasia was assessed at that time. Clinical progression was defined by meeting criteria for initiation of therapy according to the recommendations of the 2nd International Workshop for Waldenstrom Macroglobulinemia<sup>2</sup>. Progression-free survival (PFS) was defined as time from diagnosis of MGUS or SWM to progression or death, while OS was defined as time from diagnosis to death from any cause; events were censored at last follow-up date. Survival distributions were estimated using the Kaplan Meier (KM) method, with variance and 95% confidence intervals (CIs) estimated using Greenwood's formula. Median follow-up time was estimated using inverse KM method. Wilcoxon rank-sum and Fisher's exact tests were used to assess CH association with continuous and categorical variables, respectively. Two-sided p-values  $<0.05$  were considered statistically significant. Statistical analyses were performed in R (v 4.0.0).

### References

1. Kluk MJ, Lindsley RC, Aster JC, et al. Validation and Implementation of a Custom Next-Generation Sequencing Clinical Assay for Hematologic Malignancies. *J Mol Diagn.* 2016;18(4):507-515.
2. Kyle RA, Treon SP, Alexanian R, et al. Prognostic markers and criteria to initiate therapy in Waldenstrom's macroglobulinemia: consensus panel recommendations from the Second International Workshop on Waldenstrom's Macroglobulinemia. *Semin Oncol.* 2003;30(2):116-120.

**SUPPLEMENTARY TABLES**

**Table S1. List of genes and exons targeted by the clinical NGS assay.** The NGS assay has three versions that were developed over time and version 2 and 3 were used in this cohort. (A) Version 2 (n=574). (B) Version 3 (n=59)

**A**

| <b>Gene</b> | <b>Exon</b>    | <b>Gene</b> | <b>Exon</b>            |
|-------------|----------------|-------------|------------------------|
| ABL1        | e2-e10         | MAP2K1      | e2-e3                  |
| ASXL1       | e1-e13         | MEF2B       | e3                     |
| ATM         | e2-e63         | MPL         | e10                    |
| BCL11B      | e4             | MYD88       | e5                     |
| BCOR        | e2-e15         | NOTCH1      | e24-e28                |
| BCORL1      | e1-e12         | NOTCH1      | e34                    |
| BRAF        | e15            | NOTCH2      | e24-e28                |
| BRCC3       | e3-e11         | NOTCH2      | e34                    |
| CALR        | e9             | NOTCH3      | e25-e26                |
| CBL         | e7-e8          | NOTCH3      | e33                    |
| CBLB        | e9-e11         | NPM1        | e10-e11                |
| CD79B       | e5-e6          | NRAS        | e2-e5                  |
| CEBPA       | e1             | PAX5        | e3 e6-e7               |
| CNOT3       | e1-e2          | NT5C2       | e9, e11, e13, e15, e17 |
| CREBBP      | e2-e21, e23-31 | PDS5B       | e3-e35                 |
| CRLF2       | e6             | PHF6        | e2-e10                 |
| CSF1R       | e22            | PDGFRA      | e10-e21, e23           |
| CSF3R       | e14-e18        | PIGA        | e2-e6                  |
| CTCF        | e3-e12         | PIM1        | e1-e6                  |
| CTNNB1      | e2-e4          | PRPF40B     | e2-e26                 |
| CUX1        | e1-e21         | PIK3CA      | e2, e10, e21           |
| CXCR4       | e2             | PRPF8       | e2-e43                 |
| DNMT3A      | e2-e23         | PTEN        | e1-e9                  |
| DNMT3B      | e2-e23         | PTPN11      | e1-e15                 |
| EED         | e1-e12         | RAD21       | e2-e14                 |
| EGFR        | e18-e21        | RET         | e7                     |
| EP300       | e18-e27        | RIT1        | e1-e6                  |
| ETV6        | e1-e8          | RPL10       | e5                     |
| FANCL       | e1-e14         | RUNX1       | e2-e9                  |
| FBXW7       | e8-e12         | SETBP1      | e4                     |
| EZH2        | e2-e8, e11-e20 | SF3B1       | e12-e16                |
| FLT3        | e14-e16, e20   | SF1         | e1-e10, e13            |
| GATA1       | e2-e6          | SF3A1       | e1-e2, e5-e16          |
| GATA2       | e2-e6          | SETD2       | e1-e4, e6-e21          |
|             |                | SH2B3       | e2-e8                  |
| GATA3       | e4-e6          | SMC1A       | e1-e25                 |
| GNAS        | e8-e9          | SMC3        | e2-e29                 |
| GNB1        | e5-e6          | SRSF2       | e1                     |
| IDH1        | e4             | STAG2       | e3-e35                 |
| IDH2        | e4             | TET2        | e3-e11                 |

|        |                |       |                |
|--------|----------------|-------|----------------|
| IKZF1  | e2-e8          | STAT3 | e2-e17, e21-23 |
| IKZF2  | e1-e8          | TLR2  | e1             |
| IKZF3  | e1-e8          | TP53  | e2-e11         |
| IL7R   | e6             | U2AF1 | e2, e6         |
| JAK1   | e10-e25        | U2AF2 | e1-e12         |
| JAK2   | e12, e14       | WHSC1 | e17-e18        |
| JAK3   | e11-e24        | WT1   | e1-e10         |
| KIT    | e8-9, e11, e17 | XPO1  | e15-e16        |
| KRAS   | e2-e5          | ZRSR2 | e1-e11         |
| LUC7L2 | e3-e11         |       |                |

## B

| Gene    | Exon              | Gene   | Exon         |
|---------|-------------------|--------|--------------|
| ABL1    | e1-e10            | KIT    | e8-e11, e17  |
| ASXL1   | e11-e12           | KRAS   | e1-e5        |
| ATM     | e1-e62            | KMT2A  | partial      |
| ATRX    | e1-e35            | MAP2K1 | e2-e3, e6    |
| BCOR    | e1-e14            | MPL    | e4, e10      |
| BCORL1  | e1-e13            | NF1    | e1-e58       |
| BRAF    | e11-e15           | MYC    | e1-e3        |
| BRCC3   | e1-e11            | MYD88  | e5           |
| BTK     | e1, e15-e16       | NOTCH2 | e24-e28, e34 |
| CALR    | e9                | NFE2   | e3-e4        |
| CBL     | e7-e9             | NOTCH1 | e24-e28, e34 |
| CCND1   | e1-e5             | NSD2   | e18-e19      |
| CD79B   | e5-e6             | NPM1   | e10-e11      |
| CDKN2A  | e1-e5             | NRAS   | e1-e4        |
| CDKN2B  | e1-e2             | PIGA   | e1-e62       |
| CEBPA   | e1                | NT5C2  | e12-e20      |
| CREBBP  | e1-e31            | PHF6   | e1-e9        |
| CRLF2   | e6                | PRPF8  | e25-e34      |
| CSF3R   | e12-e16           | PLCG2  | e19-e20, e24 |
| CSNK1A1 | e1-e11            | PPM1D  | e6, e27, e30 |
| CTCF    | e1-e10            | RAD21  | e1-e13       |
| CUX1    | e1-e34            | PTEN   | e1-e9        |
| CXCR4   | e3                | PTPN11 | e1-e15       |
| DDX41   | e1-e17            | SBDS   | e1-e5        |
| DKC1    | e1-e15            | RIT1   | e1-e6        |
| DNMT3A  | e1-e25            | RUNX1  | e1-e9        |
| EP300   | e1-e31            | SF3B1  | e12-e18      |
| ERG     | e1-e12            | SETBP1 | e4           |
| ETNK1   | e3                | SETD2  | e1-e21       |
| ETV6    | e1-e8             | SMC3   | e1-e29       |
| EZH2    | e1-e19            | SH2B3  | e1-e8        |
| FBXW7   | e8-e12            | SMC1A  | e1-e26       |
| FLT3    | e14, e16-e17, e20 | STAT3  | e2-e24       |
| GATA1   | e1-e5             | SRSF2  | e1           |
| GATA2   | e1-e5             | STAG2  | e1-e33       |

|       |         |        |         |
|-------|---------|--------|---------|
| GNAS  | e8-e9   | TERT   | e1-e16  |
| GNB1  | e5-e6   | STAT5B | e13-e19 |
| IDH1  | e3-e10  | TERC   | e1      |
| IDH2  | e1-e11  | U2AF1  | e2,e6   |
| IKZF1 | e1-e9   | TET2   | e1-e9   |
| IL7R  | e5-e7   | TP53   | e1-e12  |
| JAK1  | e10-e25 | ZRSR2  | e1-e11  |
| JAK2  | e12-e20 | WT1    | e1-e11  |
| JAK3  | e16-e24 | XPO1   | e15-e16 |

**Table S2. List of called genes and variants at time of NGS assay.**

| Gene   | Chromosome | Variant Classification | Variant Type | Reference Allele          | Alternative Allele | cDNA Change                             | Protein Change | Total Depth | Variant Allele Frequency | NGS Panel Version | Sample ID |
|--------|------------|------------------------|--------------|---------------------------|--------------------|-----------------------------------------|----------------|-------------|--------------------------|-------------------|-----------|
| ASXL1  | 20         | Frameshift             | INS          | A                         | AG                 | c.1926_1927insG                         | G642fs*        | 221         | 81.45                    | 2                 | 165       |
| ASXL1  | 20         | Frameshift             | INS          | A                         | AG                 | c.1926_1927insG                         | G642fs*        | 335         | 52.24                    | 2                 | 136       |
| ASXL1  | 20         | Frameshift             | INS          | A                         | AG                 | c.3168_3169insG                         | T1056fs*       | 1307        | 45.98                    | 2                 | 511       |
| ASXL1  | 20         | Frameshift             | INS          | A                         | AG                 | c.1926_1927insG                         | G642fs*        | 464         | 39.01                    | 2                 | 947       |
| ASXL1  | 20         | Nonsense               | SNP          | C                         | T                  | c.2332C>T                               | Q778*          | 1623        | 35.49                    | 2                 | 856       |
| ASXL1  | 20         | Frameshift             | INS          | A                         | AG                 | c.1926_1927insG                         | G642fs*        | 410         | 23.9                     | 2                 | 471       |
| ASXL1  | 20         | Nonsense               | SNP          | C                         | T                  | c.2077C>T                               | R693*          | 202         | 22.77                    | 2                 | 1014      |
| ASXL1  | 20         | Frameshift             | DEL          | GCT                       | G                  | c.1475_1476delCT                        | A492fs*        | 739         | 22.19                    | 2                 | 1557      |
| ASXL1  | 20         | Frameshift             | DEL          | TCACCACTGCCATAGAGAGGCCGGC | T                  | c.1888_1910delCACCACCTGCCATAGAGAGGCCGGC | G629fs*        | 144         | 20.14                    | 2                 | 1701      |
| ASXL1  | 20         | Frameshift             | DEL          | TCACCACTGCCATAGAGAGGCCGGC | T                  | c.1888_1910delCACCACCTGCCATAGAGAGGCCGGC | G629fs*        | 1028        | 14.88                    | 2                 | 930       |
| ASXL1  | 20         | Frameshift             | INS          | A                         | AG                 | c.1926_1927insG                         | G642fs*        | 383         | 14.62                    | 2                 | 414       |
| ASXL1  | 20         | Frameshift             | INS          | A                         | AG                 | c.1926_1927insG                         | p.G646Wfs*12   | 404         | 11.88                    | 3                 | 1787      |
| ASXL1  | 20         | Frameshift             | DEL          | AG                        | A                  | c.1927delG                              | G642fs*        | 125         | 8.8                      | 2                 | 552       |
| ASXL1  | 20         | Nonsense               | SNP          | A                         | T                  | c.2641A>T                               | R881*          | 2370        | 8.23                     | 2                 | 779       |
| ASXL1  | 20         | Frameshift             | INS          | A                         | AG                 | c.1926_1927insG                         | p.G646Wfs*12   | 867         | 4.84                     | 3                 | 1498      |
| ASXL1  | 20         | Frameshift             | INS          | C                         | CA                 | c.1275_1276insA                         | Y425fs*        | 372         | 4.3                      | 2                 | 268       |
| ASXL1  | 20         | Nonsense               | SNP          | C                         | T                  | c.2644C>T                               | Q882*          | 1803        | 2.05                     | 2                 | 1133      |
| ATM    | 11         | Nonsense               | SNP          | C                         | T                  | c.8197C>T                               | Q2733*         | 1248        | 17.31                    | 2                 | 1041      |
| ATM    | 11         | Frameshift             | INS          | T                         | TA                 | c.5706_5707insA                         | p.S1905Ifs*25  | 832         | 4.33                     | 3                 | 252       |
| ATRX   | X          | Frameshift             | DEL          | CT                        | C                  | c.3210delA                              | p.G1071Efs*47  | 291         | 43.64                    | 3                 | 1702      |
| BCOR   | X          | Nonsense               | SNP          | G                         | A                  | c.2428C>T                               | R810*          | 230         | 45.22                    | 2                 | 338       |
| BCOR   | X          | Frameshift             | DEL          | CCCTTCCGGAG               | C                  | c.1197_1206delCCCTTCCGGAG               | G400fs*        | 499         | 13.43                    | 2                 | 43        |
| BCOR   | X          | Frameshift             | INS          | G                         | GT                 | c.2020_2020insA                         | L673fs*        | 943         | 8.06                     | 2                 | 1521      |
| BCOR   | X          | Frameshift             | DEL          | CA                        | C                  | c.4636delT                              | I1545fs*       | 600         | 6.67                     | 2                 | 909       |
| BCORL1 | X          | Deletion               | DEL          | CAGA                      | C                  | c.3756_3758delAGA                       | Deletion       | 308         | 93.51                    | 2                 | 1332      |
| BCORL1 | X          | Frameshift             | DEL          | AG                        | A                  | c.4697delG                              | E1566fs*       | 310         | 4.52                     | 2                 | 243       |
| BRAF   | 7          | Missense               | SNP          | A                         | T                  | c.1790T>A                               | L597Q          | 587         | 14.99                    | 2                 | 427       |
| BRAF   | 7          | Missense               | SNP          | T                         | C                  | c.1801A>G                               | K601E          | 584         | 9.08                     | 2                 | 427       |
| BRC3   | X          | Nonsense               | SNP          | C                         | T                  | c.823C>T                                | Q275*          | 142         | 42.96                    | 2                 | 511       |
| CALR   | 19         | Deletion               | DEL          | AGAG                      | A                  | c.1132_1134delGAG                       | E378del        | 39          | 48.72                    | 2                 | 1358      |
| CALR   | 19         | Deletion               | DEL          | TGAG                      | T                  | c.1192_1194delGAG                       | Deletion       | 50          | 36                       | 2                 | 1106      |
| CALR   | 19         | Deletion               | DEL          | TGAGGATGAG                | T                  | c.1177_1185delGAGGATGAG                 | 392_394deIEDE  | 224         | 25.45                    | 2                 | 655       |
| CBL    | 11         | Missense               | SNP          | G                         | A                  | c.1259G>A                               | R420Q          | 135         | 41.48                    | 2                 | 1014      |
| CBL    | 11         | Missense               | SNP          | G                         | A                  | c.1211G>A                               | C404Y          | 427         | 24.59                    | 2                 | 511       |
| CBL    | 11         | Missense               | SNP          | A                         | T                  | c.1112A>T                               | Y371F          | 590         | 4.41                     | 2                 | 155       |
| CBL    | 11         | Missense               | SNP          | T                         | C                  | c.1139T>C                               | L380P          | 1261        | 3.09                     | 2                 | 933       |
| CD79B  | 17         | Missense               | SNP          | T                         | C                  | c.590A>G                                | Y197C          | 360         | 26.94                    | 2                 | 1297      |
| CD79B  | 17         | Missense               | SNP          | A                         | G                  | c.589T>C                                | Y197H          | 247         | 10.53                    | 2                 | 1110      |
| CD79B  | 17         | Missense               | SNP          | A                         | G                  | c.589T>C                                | Y197H          | 357         | 6.44                     | 2                 | 1333      |
| CD79B  | 17         | Missense               | SNP          | T                         | C                  | c.590A>G                                | Y197C          | 283         | 6.01                     | 2                 | 527       |
| CD79B  | 17         | Missense               | SNP          | T                         | C                  | c.590A>G                                | p.Y197C        | 1648        | 4.13                     | 3                 | 696       |

|         |    |            |     |                                |    |                                           |             |      |       |   |      |
|---------|----|------------|-----|--------------------------------|----|-------------------------------------------|-------------|------|-------|---|------|
| CD79 B  | 17 | Missense   | SNP | T                              | G  | c.590A>C                                  | Y197S       | 461  | 2.82  | 2 | 1462 |
| CD79 B  | 17 | Missense   | SNP | T                              | C  | c.590A>G                                  | Y197C       | 461  | 2.82  | 2 | 1462 |
| CRE BBP | 16 | Frameshift | DEL | GA                             | G  | c.704delA                                 | S235fs*     | 17   | 35.29 | 2 | 457  |
| CRE BBP | 16 | Frameshift | DEL | CTTCTAACACATTGGGCC AGAAATCACCT | C  | c.4651_4678delAGGTGATTCTGGCCCAATGTGTTAGAA | E1550fs*    | 1369 | 11.25 | 2 | 1685 |
| CRE BBP | 16 | Nonsense   | SNP | A                              | T  | c.3657T>A                                 | C1219*      | 444  | 5.41  | 2 | 933  |
| CTC F   | 16 | Missense   | SNP | C                              | A  | c.1133C>A                                 | P378Q       | 127  | 8.66  | 2 | 1331 |
| CXC R4  | 2  | Nonsense   | SNP | G                              | A  | c.1000C>T                                 | R334*       | 532  | 45.3  | 2 | 531  |
| CXC R4  | 2  | Nonsense   | SNP | G                              | C  | c.1013C>G                                 | S338*       | 571  | 41.51 | 2 | 123  |
| CXC R4  | 2  | Nonsense   | SNP | G                              | T  | c.1013C>A                                 | S338*       | 558  | 38.17 | 2 | 699  |
| CXC R4  | 2  | Nonsense   | SNP | G                              | T  | c.1013C>A                                 | S338*       | 614  | 34.2  | 2 | 1016 |
| CXC R4  | 2  | Frameshift | DEL | CTCAGACT                       | C  | c.1035_1041delAGTCTGA                     | E346fs*     | 279  | 32.97 | 2 | 1285 |
| CXC R4  | 2  | Frameshift | INS | A                              | AT | c.977_977insA                             | L326fs*     | 428  | 31.78 | 2 | 621  |
| CXC R4  | 2  | Frameshift | INS | G                              | GT | c.1008dupA                                | p.H337Tfs*7 | 659  | 30.8  | 3 | 459  |
| CXC R4  | 2  | Nonsense   | SNP | G                              | C  | c.1013C>G                                 | S338*       | 655  | 29.92 | 2 | 1593 |
| CXC R4  | 2  | Nonsense   | SNP | G                              | C  | c.1013C>G                                 | S338*       | 647  | 27.51 | 2 | 1127 |
| CXC R4  | 2  | Frameshift | INS | A                              | AG | c.986_986insC                             | L329fs*     | 339  | 24.48 | 2 | 389  |
| CXC R4  | 2  | Nonsense   | SNP | G                              | C  | c.1013C>G                                 | S338*       | 546  | 23.81 | 2 | 1359 |
| CXC R4  | 2  | Nonsense   | SNP | C                              | A  | c.1006C>A                                 | G336*       | 2229 | 23.69 | 2 | 278  |
| CXC R4  | 2  | Frameshift | INS | G                              | GT | c.953_953insT                             | T318fs*     | 625  | 22.88 | 2 | 491  |
| CXC R4  | 2  | Nonsense   | SNP | G                              | T  | c.1013C>A                                 | S338*       | 624  | 22.12 | 2 | 476  |
| CXC R4  | 2  | Nonsense   | SNP | G                              | T  | c.1013C>A                                 | S338*       | 772  | 21.76 | 2 | 1041 |
| CXC R4  | 2  | Nonsense   | SNP | G                              | C  | c.1013C>G                                 | S338*       | 447  | 21.7  | 2 | 1134 |
| CXC R4  | 2  | Nonsense   | SNP | G                              | C  | c.1013C>G                                 | S338*       | 493  | 20.28 | 2 | 1350 |
| CXC R4  | 2  | Frameshift | DEL | CA                             | C  | c.1006delT                                | G335fs*     | 725  | 19.59 | 2 | 1709 |
| CXC R4  | 2  | Frameshift | DEL | TCG                            | T  | c.1002_1003delCG                          | R335fs*     | 710  | 19.44 | 2 | 1709 |
| CXC R4  | 2  | Frameshift | DEL | AATGTC                         | A  | c.1012_1016delGACAT                       | H337fs*     | 718  | 19.08 | 2 | 1709 |
| CXC R4  | 2  | Frameshift | INS | G                              | GT | c.953_953insA                             | T318fs*     | 288  | 18.06 | 2 | 1428 |
| CXC R4  | 2  | Frameshift | DEL | AGAGGT                         | A  | c.957_961delACCTC                         | S320fs*     | 318  | 16.98 | 2 | 911  |
| CXC R4  | 2  | Frameshift | INS | G                              | GT | c.953_953insA                             | T318fs*     | 275  | 16.73 | 2 | 1451 |
| CXC R4  | 2  | Nonsense   | SNP | G                              | T  | c.1013G>T                                 | S338*       | 1148 | 15.59 | 2 | 152  |
| CXC R4  | 2  | Frameshift | DEL | CAG                            | C  | c.958_959delCT                            | S319fs*     | 253  | 15.42 | 2 | 1501 |
| CXC R4  | 2  | Nonsense   | SNP | G                              | C  | c.1013C>G                                 | S338*       | 588  | 14.46 | 2 | 1024 |
| CXC R4  | 2  | Nonsense   | SNP | G                              | C  | c.1013C>G                                 | S338*       | 616  | 14.29 | 2 | 1452 |
| CXC R4  | 2  | Nonsense   | SNP | G                              | A  | c.1000C>T                                 | R334*       | 766  | 13.97 | 2 | 1020 |
| CXC R4  | 2  | Frameshift | INS | G                              | GT | c.953_953insA                             | T318fs*     | 317  | 13.56 | 2 | 1556 |
| CXC R4  | 2  | Frameshift | INS | G                              | GA | c.1012dupT                                | p.S338Ffs*6 | 492  | 13.01 | 3 | 1737 |
| CXC R4  | 2  | Nonsense   | SNP | G                              | C  | c.1013C>G                                 | S338*       | 822  | 12.53 | 2 | 1042 |
| CXC R4  | 2  | Nonsense   | SNP | G                              | T  | c.1013C>A                                 | S338*       | 590  | 12.37 | 2 | 411  |
| CXC R4  | 2  | Nonsense   | SNP | G                              | T  | c.1013C>A                                 | S338*       | 542  | 12.36 | 2 | 1061 |
| CXC R4  | 2  | Nonsense   | SNP | G                              | C  | c.1013C>G                                 | S338*       | 468  | 12.18 | 2 | 187  |
| CXC R4  | 2  | Frameshift | INS | A                              | AC | c.1019_1019insG                           | V340fs*     | 281  | 12.1  | 2 | 1451 |



|           |   |            |     |          |        |                     |         |      |       |   |      |
|-----------|---|------------|-----|----------|--------|---------------------|---------|------|-------|---|------|
| CXC<br>R4 | 2 | Nonsense   | SNP | G        | A      | c.1000C>T           | R334*   | 519  | 11.75 | 2 | 247  |
| CXC<br>R4 | 2 | Nonsense   | SNP | G        | C      | c.1013C>G           | S338*   | 602  | 11.63 | 2 | 1420 |
| CXC<br>R4 | 2 | Frameshift | DEL | TCA      | T      | c.961_962delTG      | V320fs* | 298  | 11.41 | 2 | 1388 |
| CXC<br>R4 | 2 | Nonsense   | SNP | G        | T      | c.1013C>A           | S338*   | 581  | 11.36 | 2 | 527  |
| CXC<br>R4 | 2 | Frameshift | INS | G        | GA     | c.1022_1022insT     | S341fs* | 318  | 11.32 | 2 | 1491 |
| CXC<br>R4 | 2 | Nonsense   | SNP | G        | C      | c.1013C>G           | S338*   | 543  | 11.23 | 2 | 1236 |
| CXC<br>R4 | 2 | Frameshift | INS | A        | AGAAAG | c.986_986insCTTC    | L329fs* | 267  | 10.86 | 2 | 1405 |
| CXC<br>R4 | 2 | Frameshift | DEL | ACAGAT   | A      | c.1019_1023delATCTG | V340fs* | 510  | 10.39 | 2 | 1007 |
| CXC<br>R4 | 2 | Nonsense   | SNP | G        | C      | c.1013C>G           | S338*   | 530  | 9.62  | 2 | 1319 |
| CXC<br>R4 | 2 | Frameshift | INS | G        | GA     | c.1022_1022insT     | S341fs* | 302  | 9.6   | 2 | 113  |
| CXC<br>R4 | 2 | Nonsense   | SNP | G        | A      | c.1000C>T           | R334*   | 420  | 9.52  | 2 | 1542 |
| CXC<br>R4 | 2 | Nonsense   | SNP | G        | C      | c.1013C>G           | p.S338* | 530  | 9.43  | 3 | 1769 |
| CXC<br>R4 | 2 | Frameshift | INS | G        | GT     | c.953_953insA       | T318fs* | 287  | 9.41  | 2 | 1602 |
| CXC<br>R4 | 2 | Nonsense   | SNP | G        | C      | c.1013C>G           | S338*   | 534  | 9.36  | 2 | 277  |
| CXC<br>R4 | 2 | Frameshift | DEL | GA       | G      | c.1022delT          | S341fs* | 294  | 8.84  | 2 | 430  |
| CXC<br>R4 | 2 | Frameshift | INS | G        | GA     | c.1022_1022insT     | S341fs* | 286  | 8.74  | 2 | 1117 |
| CXC<br>R4 | 2 | Nonsense   | SNP | G        | C      | c.1013G>C           | S338*   | 185  | 8.65  | 2 | 32   |
| CXC<br>R4 | 2 | Frameshift | INS | G        | GA     | c.1022_1022insT     | S341fs* | 266  | 8.65  | 2 | 599  |
| CXC<br>R4 | 2 | Nonsense   | SNP | G        | A      | c.1000G>A           | R334*   | 1007 | 8.54  | 2 | 978  |
| CXC<br>R4 | 2 | Frameshift | DEL | TGG      | T      | c.991_992delCC      | S330fs* | 509  | 8.45  | 2 | 1168 |
| CXC<br>R4 | 2 | Frameshift | DEL | GGA      | G      | c.1023_1024delTTC   | S342fs* | 311  | 8.36  | 2 | 1429 |
| CXC<br>R4 | 2 | Nonsense   | SNP | G        | T      | c.1013C>A           | S338*   | 555  | 8.11  | 2 | 719  |
| CXC<br>R4 | 2 | Frameshift | INS | G        | GA     | c.1013_1013insT     | S338fs* | 447  | 8.05  | 2 | 1478 |
| CXC<br>R4 | 2 | Nonsense   | SNP | G        | A      | c.1000C>T           | R334*   | 577  | 7.45  | 2 | 994  |
| CXC<br>R4 | 2 | Nonsense   | SNP | G        | A      | c.1000G>A           | R334*   | 1449 | 7.04  | 2 | 869  |
| CXC<br>R4 | 2 | Frameshift | INS | C        | CT     | c.974_974insA       | S325fs* | 318  | 6.92  | 2 | 1557 |
| CXC<br>R4 | 2 | Nonsense   | SNP | G        | T      | c.1013C>A           | S338*   | 513  | 6.82  | 2 | 399  |
| CXC<br>R4 | 2 | Frameshift | DEL | GAA      | G      | c.1022_1023delTT    | S341fs* | 264  | 6.82  | 2 | 760  |
| CXC<br>R4 | 2 | Nonsense   | SNP | G        | C      | c.1013C>G           | S338*   | 490  | 6.12  | 2 | 1159 |
| CXC<br>R4 | 2 | Nonsense   | SNP | G        | A      | c.1000C>T           | R334*   | 667  | 6     | 2 | 353  |
| CXC<br>R4 | 2 | Frameshift | DEL | AGGTGAGT | A      | c.955_961delACTCACC | T318fs* | 306  | 5.88  | 2 | 582  |
| CXC<br>R4 | 2 | Nonsense   | SNP | G        | A      | c.1000G>A           | R334*   | 1571 | 5.86  | 2 | 289  |
| CXC<br>R4 | 2 | Nonsense   | SNP | G        | T      | c.1013C>A           | S338*   | 672  | 5.8   | 2 | 715  |
| CXC<br>R4 | 2 | Nonsense   | SNP | G        | A      | c.1000C>T           | R334*   | 506  | 5.73  | 2 | 433  |
| CXC<br>R4 | 2 | Frameshift | INS | A        | AC     | c.1019_1019insG     | V340fs* | 285  | 5.61  | 2 | 1691 |
| CXC<br>R4 | 2 | Frameshift | INS | C        | CT     | c.994_994insA       | K331fs* | 581  | 5.34  | 2 | 1306 |
| CXC<br>R4 | 2 | Frameshift | INS | G        | GA     | c.1022_1022insT     | S341fs* | 281  | 5.34  | 2 | 1118 |
| CXC<br>R4 | 2 | Frameshift | INS | C        | CA     | c.1018_1018insT     | S339fs* | 451  | 5.32  | 2 | 517  |
| CXC<br>R4 | 2 | Frameshift | INS | G        | GA     | c.1013_1013insT     | S338fs* | 775  | 5.29  | 2 | 933  |
| CXC<br>R4 | 2 | Frameshift | DEL | CA       | C      | c.1018delT          | S339fs* | 492  | 5.28  | 2 | 1085 |
| CXC<br>R4 | 2 | Frameshift | INS | C        | CA     | c.958_958insT       | S319fs* | 325  | 5.23  | 2 | 569  |

|         |   |            |     |                                |     |                                              |              |      |       |   |      |
|---------|---|------------|-----|--------------------------------|-----|----------------------------------------------|--------------|------|-------|---|------|
| CXC R4  | 2 | Frameshift | DEL | GA                             | G   | c.1013delT                                   | S338fs*      | 617  | 5.19  | 2 | 1009 |
| CXC R4  | 2 | Nonsense   | SNP | G                              | A   | c.1000C>T                                    | R334*        | 527  | 4.93  | 2 | 704  |
| CXC R4  | 2 | Nonsense   | SNP | G                              | C   | c.1013C>G                                    | S338*        | 630  | 4.92  | 2 | 1256 |
| CXC R4  | 2 | Frameshift | DEL | GA                             | G   | c.1013delT                                   | S338fs*      | 430  | 4.65  | 2 | 1120 |
| CXC R4  | 2 | Nonsense   | SNP | G                              | A   | c.1000C>T                                    | R334*        | 424  | 4.48  | 2 | 1120 |
| CXC R4  | 2 | Frameshift | DEL | GAA                            | G   | c.1020_1021delTT                             | p.S341Hfs*2  | 247  | 4.45  | 3 | 1787 |
| CXC R4  | 2 | Nonsense   | SNP | G                              | T   | c.1013C>A                                    | S338*        | 634  | 4.26  | 2 | 394  |
| CXC R4  | 2 | Frameshift | DEL | ATGT                           | AG  | c.1009_1011delinsC                           | G336fs*      | 639  | 4.23  | 2 | 1085 |
| CXC R4  | 2 | Nonsense   | SNP | G                              | C   | c.1013C>G                                    | S338*        | 830  | 4.22  | 2 | 201  |
| CXC R4  | 2 | Frameshift | INS | G                              | GT  | c.953_953insA                                | T318fs*      | 416  | 4.09  | 2 | 857  |
| CXC R4  | 2 | Frameshift | DEL | ACT                            | A   | c.1030_1031delAG                             | E343fs*      | 295  | 4.07  | 2 | 1162 |
| CXC R4  | 2 | Nonsense   | SNP | G                              | A   | c.1000C>T                                    | R334*        | 456  | 3.95  | 2 | 1148 |
| CXC R4  | 2 | Frameshift | DEL | GA                             | G   | c.1013delT                                   | S338fs*      | 357  | 3.92  | 2 | 1036 |
| CXC R4  | 2 | Nonsense   | SNP | T                              | A   | c.991A>T                                     | K331*        | 695  | 3.88  | 2 | 1005 |
| CXC R4  | 2 | Frameshift | INS | G                              | GT  | c.953_953insT                                | T318fs*      | 432  | 3.7   | 2 | 705  |
| CXC R4  | 2 | Frameshift | INS | G                              | GA  | c.1021dupT                                   | p.S341Ffs*3  | 462  | 3.68  | 3 | 1769 |
| CXC R4  | 2 | Nonsense   | SNP | G                              | T   | c.1013C>A                                    | S338*        | 669  | 3.44  | 2 | 1091 |
| CXC R4  | 2 | Frameshift | DEL |                                |     | c.1015_1104del                               | S339fs*      | 419  | 3.3   | 2 | 128  |
| CXC R4  | 2 | Frameshift | INS | C                              | CT  | c.994_994insA                                | K331fs*      | 572  | 2.97  | 2 | 1525 |
| CXC R4  | 2 | Nonsense   | SNP | G                              | A   | c.1000C>T                                    | R334*        | 567  | 2.65  | 2 | 167  |
| CXC R4  | 2 | Frameshift | DEL | TGAAAACTTGAAGACTCAGACTCAGTGGAA | T   | c.1049_1077delTGAAAACTTGAAGACTCAGACTCAGTGGAA | H350fs*      | 722  | 2.63  | 2 | 800  |
| CXC R4  | 2 | Frameshift | INS | G                              | GT  | c.952dupA                                    | p.T318Nfs*26 | 1925 | 1.04  | 3 | 932  |
| DNM T3A | 2 | Missense   | SNP | C                              | T   | c.2312C>T                                    | R771Q        | 1356 | 49.63 | 2 | 783  |
| DNM T3A | 2 | Nonsense   | SNP | C                              | T   | c.2580G>A                                    | W860*        | 1165 | 44.03 | 2 | 856  |
| DNM T3A | 2 | Frameshift | INS | G                              | GCT | c.883_883insAG                               | E294fs*      | 370  | 42.16 | 2 | 338  |
| DNM T3A | 2 | Missense   | SNP | G                              | A   | c.2651C>T                                    | A884V        | 336  | 41.07 | 2 | 89   |
| DNM T3A | 2 | Missense   | SNP | C                              | A   | c.1628G>T                                    | G543V        | 273  | 41.03 | 2 | 1155 |
| DNM T3A | 2 | Frameshift | INS | T                              | TC  | c.1144_1144insG                              | G381fs*      | 233  | 35.62 | 2 | 1416 |
| DNM T3A | 2 | Frameshift | DEL | CA                             | C   | c.1742delT                                   | W581fs*      | 255  | 34.51 | 2 | 813  |
| DNM T3A | 2 | Deletion   | DEL | AAAG                           | A   | c.2196_2198delCTT                            | 732delF      | 725  | 29.79 | 2 | 143  |
| DNM T3A | 2 | Frameshift | DEL | CCACGGCCTTGGCAGTGT             | C   | c.1198_1214delACACTGCCAAGGC CGTG             | V399fs*      | 643  | 24.73 | 2 | 1347 |
| DNM T3A | 2 | Missense   | SNP | G                              | A   | c.2644C>T                                    | R882C        | 434  | 23.27 | 2 | 1034 |
| DNM T3A | 2 | Missense   | SNP | A                              | C   | c.2261T>G                                    | L754R        | 1414 | 21.92 | 2 | 1086 |
| DNM T3A | 2 | Missense   | SNP | A                              | C   | c.929T>G                                     | I310S        | 895  | 19.66 | 2 | 927  |
| DNM T3A | 2 | Frameshift | INS | G                              | GC  | c.1762_1762insG                              | G587fs*      | 467  | 19.49 | 2 | 857  |
| DNM T3A | 2 | Frameshift | INS | C                              | CG  | c.700_700insC                                | P233fs*      | 292  | 18.49 | 2 | 414  |
| DNM T3A | 2 | Frameshift | INS | T                              | TG  | c.2008_2008insC                              | S669fs*      | 744  | 18.15 | 2 | 900  |
| DNM T3A | 2 | Frameshift | DEL | GA                             | G   | c.1915delT                                   | S638fs*      | 258  | 17.83 | 2 | 1438 |
| DNM T3A | 2 | Frameshift | DEL | TC                             | T   | c.1793delG                                   | p.R598Qfs*53 | 2037 | 15.86 | 3 | 1768 |
| DNM T3A | 2 | Nonsense   | SNP | C                              | T   | c.939G>A                                     | p.W313*      | 1664 | 15.75 | 3 | 1787 |
| DNM T3A | 2 | Missense   | SNP | G                              | A   | c.2309G>A                                    | S770L        | 111  | 15.32 | 2 | 232  |

|         |   |            |     |                              |    |                                          |              |      |       |   |      |
|---------|---|------------|-----|------------------------------|----|------------------------------------------|--------------|------|-------|---|------|
| DNM T3A | 2 | Missense   | SNP | C                            | T  | c.1945G>A                                | V649M        | 377  | 15.12 | 2 | 956  |
| DNM T3A | 2 | Missense   | SNP | A                            | C  | c.2393T>G                                | L798R        | 509  | 14.34 | 2 | 956  |
| DNM T3A | 2 | Frameshift | DEL | GCCCT                        | G  | c.1263_1266delAGGG                       | G422fs*      | 338  | 13.31 | 2 | 599  |
| DNM T3A | 2 | Missense   | SNP | C                            | T  | c.2645G>A                                | R882H        | 895  | 13.18 | 2 | 28   |
| DNM T3A | 2 | Frameshift | DEL | AG                           | A  | c.1606delC                               | S535fs*      | 339  | 12.39 | 2 | 1346 |
| DNM T3A | 2 | Frameshift | INS | T                            | TG | c.1753_1753insC                          | Y584fs*      | 224  | 11.61 | 2 | 1120 |
| DNM T3A | 2 | Missense   | SNP | G                            | A  | c.976C>T                                 | R326C        | 679  | 11.05 | 2 | 1704 |
| DNM T3A | 2 | Missense   | SNP | G                            | A  | c.2644C>T                                | R882C        | 768  | 10.94 | 2 | 1008 |
| DNM T3A | 2 | Missense   | SNP | A                            | G  | c.2251T>C                                | F751L        | 1619 | 10.44 | 2 | 1063 |
| DNM T3A | 2 | Frameshift | DEL | CA                           | C  | c.1950delT                               | L651fs*      | 350  | 10.29 | 2 | 1341 |
| DNM T3A | 2 | Missense   | SNP | G                            | A  | c.2245C>T                                | R749C        | 1362 | 10.28 | 2 | 178  |
| DNM T3A | 2 | Missense   | SNP | G                            | C  | c.2317C>G                                | p.L773V      | 1470 | 10.2  | 3 | 1751 |
| DNM T3A | 2 | Missense   | SNP | C                            | G  | c.1628G>C                                | G543A        | 337  | 9.5   | 2 | 1623 |
| DNM T3A | 2 | Missense   | SNP | C                            | A  | c.1481G>T                                | C494F        | 463  | 9.29  | 2 | 571  |
| DNM T3A | 2 | Frameshift | DEL | CG                           | C  | c.2375delC                               | R792fs*      | 491  | 8.96  | 2 | 1129 |
| DNM T3A | 2 | Frameshift | DEL | CCA                          | C  | c.2458_2459delTG                         | L819fs*      | 295  | 8.47  | 2 | 69   |
| DNM T3A | 2 | Missense   | SNP | C                            | A  | c.1969G>T                                | V657L        | 529  | 7.18  | 2 | 139  |
| DNM T3A | 2 | Frameshift | DEL | AC                           | A  | c.1907delG                               | V636fs*      | 549  | 6.56  | 2 | 113  |
| DNM T3A | 2 | Missense   | SNP | C                            | T  | c.977C>T                                 | R326H        | 894  | 6.49  | 2 | 727  |
| DNM T3A | 2 | Missense   | SNP | G                            | C  | c.2141C>G                                | S714C        | 933  | 6.43  | 2 | 1331 |
| DNM T3A | 2 | Missense   | SNP | G                            | A  | c.1903G>A                                | R635W        | 931  | 6.34  | 2 | 381  |
| DNM T3A | 2 | Missense   | SNP | G                            | A  | c.2644C>T                                | R882C        | 765  | 6.01  | 2 | 1162 |
| DNM T3A | 2 | Missense   | SNP | T                            | C  | c.1933A>G                                | T645A        | 397  | 5.79  | 2 | 1685 |
| DNM T3A | 2 | Frameshift | DEL | CTCATTTCATGAAGACAGG<br>AAAAT | C  | c.2562_2583delATTTTCCTGTCTTC<br>ATGAATGA | E855fs*      | 893  | 5.71  | 2 | 1153 |
| DNM T3A | 2 | Missense   | SNP | C                            | A  | c.1481G>T                                | C494F        | 323  | 5.26  | 2 | 1685 |
| DNM T3A | 2 | Missense   | SNP | A                            | G  | c.2578T>C                                | p.W860R      | 253  | 5.14  | 3 | 164  |
| DNM T3A | 2 | Missense   | SNP | C                            | T  | c.2387G>A                                | G796D        | 389  | 4.88  | 2 | 1463 |
| DNM T3A | 2 | Missense   | SNP | C                            | T  | c.2246G>A                                | R749H        | 1563 | 4.67  | 2 | 901  |
| DNM T3A | 2 | Missense   | SNP | A                            | T  | c.2042T>A                                | I681N        | 324  | 4.63  | 2 | 62   |
| DNM T3A | 2 | Missense   | SNP | G                            | A  | c.1096C>T                                | R366C        | 1151 | 4.6   | 2 | 1167 |
| DNM T3A | 2 | Missense   | SNP | C                            | T  | c.2645G>A                                | R882H        | 647  | 4.48  | 2 | 1347 |
| DNM T3A | 2 | Missense   | SNP | T                            | C  | c.1933T>C                                | T645A        | 832  | 3.97  | 2 | 750  |
| DNM T3A | 2 | Missense   | SNP | G                            | T  | c.2395C>A                                | P799T        | 536  | 3.73  | 2 | 1338 |
| DNM T3A | 2 | Missense   | SNP | A                            | C  | c.1640T>G                                | p.L547R      | 731  | 3.69  | 3 | 1750 |
| DNM T3A | 2 | Frameshift | DEL | CT                           | C  | c.1718delA                               | p.Q573Rfs*78 | 2602 | 3.54  | 3 | 932  |
| DNM T3A | 2 | Missense   | SNP | G                            | A  | c.2185C>T                                | R729W        | 685  | 3.5   | 2 | 1079 |
| DNM T3A | 2 | Frameshift | DEL | CGATG                        | C  | c.2146_2149delCATC                       | I715fs*      | 876  | 3.08  | 2 | 1158 |
| DNM T3A | 2 | Missense   | SNP | C                            | A  | c.2186G>T                                | R729L        | 643  | 2.95  | 2 | 1065 |
| DNM T3A | 2 | Missense   | SNP | A                            | G  | c.2264T>C                                | F755S        | 1523 | 2.82  | 2 | 1419 |
| DNM T3A | 2 | Missense   | SNP | A                            | G  | c.2339T>C                                | I780T        | 1118 | 2.77  | 2 | 1613 |
| DNM T3A | 2 | Frameshift | DEL | CT                           | C  | c.2596delA                               | R866fs*      | 829  | 2.53  | 2 | 62   |

|         |    |             |     |               |   |                            |                |      |       |   |      |
|---------|----|-------------|-----|---------------|---|----------------------------|----------------|------|-------|---|------|
| DNM T3A | 2  | Missense    | SNP | A             | G | c.2114T>C                  | I705T          | 806  | 2.48  | 2 | 1731 |
| DNM T3A | 2  | Missense    | SNP | G             | C | c.2141C>G                  | S714C          | 953  | 2.41  | 2 | 927  |
| DNM T3A | 2  | Splice site | SNP | C             | T | c.1279+1G>A                | null           | 519  | 1.54  | 3 | 164  |
| DNM T3A | 2  | Splice site | SNP | C             | T | c.1554+1G>A                | null           | 301  | 1.33  | 3 | 1775 |
| EP300   | 22 | Missense    | SNP | G             | A | c.4199G>A                  | S1400N         | 133  | 31.58 | 2 | 1153 |
| EP300   | 22 | Deletion    | DEL | GTGAGAAGTGTTC | G | c.3603_3617delTGAGAAGTGTTC | E1202_N1206del | 639  | 14.71 | 2 | 94   |
| EP300   | 22 | Deletion    | DEL | AGAT          | A | c.4330_4332delGAT          | D1444del       | 222  | 10.36 | 2 | 1685 |
| ETV6    | 12 | Missense    | SNP | G             | A | c.1058G>A                  | R353Q          | 935  | 51.98 | 2 | 1713 |
| ETV6    | 12 | Deletion    | DEL | CAAAGTAAACATT | C | c.1207_1218delAAAGTAAACATT | 403_406deKLN1  | 591  | 24.03 | 2 | 389  |
| ETV6    | 12 | Missense    | SNP | T             | G | c.1138T>G                  | p.W380G        | 316  | 7.59  | 3 | 1787 |
| ETV6    | 12 | Frameshift  | DEL | CTA           | C | c.417_418delTA             | S139fs*        | 1555 | 7.07  | 2 | 338  |
| ETV6    | 12 | Missense    | SNP | A             | G | c.1177A>G                  | K393E          | 539  | 7.05  | 2 | 761  |
| EZH2    | 7  | Nonsense    | SNP | C             | T | c.1512G>A                  | W504*          | 376  | 12.77 | 2 | 532  |
| FLT3    | 13 | Missense    | SNP | C             | A | c.2503G>T                  | D835Y          | 839  | 33.73 | 2 | 110  |
| GNA S   | 20 | Missense    | SNP | G             | A | c.2531G>A                  | R844H          | 1550 | 6     | 2 | 282  |
| GNB1    | 1  | Missense    | SNP | T             | C | c.169A>G                   | K57E           | 1161 | 16.71 | 2 | 1014 |
| GNB1    | 1  | Missense    | SNP | T             | C | c.169A>G                   | K57E           | 1131 | 4.51  | 2 | 1139 |
| GNB1    | 1  | Missense    | SNP | C             | A | c.171G>T                   | K57N           | 1177 | 2.63  | 2 | 1014 |
| GNB1    | 1  | Missense    | SNP | T             | C | c.169A>G                   | K57E           | 1353 | 2.51  | 2 | 1602 |
| GNB1    | 1  | Missense    | SNP | T             | C | c.169T>C                   | K57E           | 2094 | 1.81  | 2 | 869  |
| IDH1    | 2  | Missense    | SNP | G             | C | c.394C>G                   | R132G          | 1016 | 44.78 | 2 | 136  |
| IDH2    | 15 | Missense    | SNP | G             | A | c.418C>T                   | R140W          | 1647 | 51.24 | 2 | 1661 |
| IKZF1   | 7  | Nonsense    | SNP | C             | T | c.1531C>T                  | R511*          | 530  | 15.47 | 2 | 110  |
| IKZF3   | 17 | Missense    | SNP | A             | C | c.485T>G                   | L162R          | 741  | 13.63 | 2 | 1297 |
| JAK2    | 9  | Missense    | SNP | G             | T | c.1849G>T                  | V617F          | 358  | 53.35 | 2 | 165  |
| JAK2    | 9  | Missense    | SNP | G             | T | c.1849G>T                  | V617F          | 536  | 17.54 | 2 | 382  |
| JAK2    | 9  | Missense    | SNP | G             | T | c.1849G>T                  | V617F          | 400  | 8.25  | 2 | 1623 |
| JAK2    | 9  | Missense    | SNP | G             | T | c.1849G>T                  | V617F          | 501  | 8.18  | 2 | 1563 |
| JAK2    | 9  | Missense    | SNP | G             | T | c.1849G>T                  | V617F          | 644  | 3.11  | 2 | 733  |
| KRAS    | 12 | Missense    | SNP | G             | T | c.64C>A                    | Q22K           | 349  | 3.72  | 2 | 427  |
| MYD88   | 3  | Missense    | SNP | T             | C | c.794T>C                   | L265P          | 155  | 86.45 | 2 | 699  |
| MYD88   | 3  | Missense    | SNP | T             | C | c.794T>C                   | L265P          | 240  | 55    | 2 | 389  |
| MYD88   | 3  | Missense    | SNP | T             | C | c.794T>C                   | L265P          | 226  | 46.02 | 2 | 1041 |
| MYD88   | 3  | Missense    | SNP | T             | C | c.794T>C                   | L265P          | 198  | 45.45 | 2 | 531  |
| MYD88   | 3  | Missense    | SNP | T             | C | c.794T>C                   | L265P          | 180  | 45    | 2 | 317  |
| MYD88   | 3  | Missense    | SNP | T             | C | c.794T>C                   | L265P          | 326  | 42.64 | 2 | 444  |
| MYD88   | 3  | Missense    | SNP | T             | C | c.794T>C                   | L265P          | 207  | 41.55 | 2 | 1093 |
| MYD88   | 3  | Missense    | SNP | T             | C | c.794T>C                   | L265P          | 244  | 39.34 | 2 | 1375 |
| MYD88   | 3  | Missense    | SNP | T             | C | c.794T>C                   | L265P          | 238  | 39.08 | 2 | 911  |
| MYD88   | 3  | Missense    | SNP | T             | C | c.794T>C                   | L265P          | 195  | 38.97 | 2 | 1350 |
| MYD88   | 3  | Missense    | SNP | T             | C | c.794T>C                   | L265P          | 172  | 37.79 | 2 | 1451 |
| MYD88   | 3  | Missense    | SNP | T             | C | c.794T>C                   | L265P          | 267  | 37.45 | 2 | 1018 |
| MYD88   | 3  | Missense    | SNP | T             | C | c.794T>C                   | L265P          | 202  | 36.14 | 2 | 621  |
| MYD88   | 3  | Missense    | SNP | T             | C | c.794T>C                   | L265P          | 218  | 35.78 | 2 | 476  |
| MYD88   | 3  | Missense    | SNP | T             | C | c.794T>C                   | L265P          | 202  | 35.64 | 2 | 1285 |
| MYD88   | 3  | Missense    | SNP | T             | C | c.794T>C                   | L265P          | 225  | 35.11 | 2 | 1016 |
| MYD88   | 3  | Missense    | SNP | T             | C | c.794T>C                   | L265P          | 239  | 33.89 | 2 | 1593 |
| MYD88   | 3  | Missense    | SNP | T             | C | c.794T>C                   | L265P          | 120  | 33.33 | 2 | 1171 |

|       |   |          |     |   |   |          |         |      |       |   |      |
|-------|---|----------|-----|---|---|----------|---------|------|-------|---|------|
| MYD88 | 3 | Missense | SNP | T | C | c.794T>C | L265P   | 544  | 33.09 | 2 | 272  |
| MYD88 | 3 | Missense | SNP | T | C | c.794T>C | L265P   | 234  | 32.48 | 2 | 1059 |
| MYD88 | 3 | Missense | SNP | T | C | c.794T>C | L265P   | 82   | 31.71 | 2 | 1701 |
| MYD88 | 3 | Missense | SNP | T | C | c.794T>C | L265P   | 143  | 30.77 | 2 | 1153 |
| MYD88 | 3 | Missense | SNP | T | C | c.794T>C | L265P   | 138  | 28.99 | 2 | 123  |
| MYD88 | 3 | Missense | SNP | T | C | c.794T>C | L265P   | 119  | 28.57 | 2 | 1045 |
| MYD88 | 3 | Missense | SNP | T | C | c.794T>C | L265P   | 177  | 28.25 | 2 | 32   |
| MYD88 | 3 | Missense | SNP | T | C | c.794T>C | L265P   | 200  | 27.5  | 2 | 1134 |
| MYD88 | 3 | Missense | SNP | T | C | c.794T>C | L265P   | 528  | 27.46 | 2 | 491  |
| MYD88 | 3 | Missense | SNP | T | C | c.794T>C | L265P   | 175  | 27.43 | 2 | 1714 |
| MYD88 | 3 | Missense | SNP | T | C | c.794T>C | p.L265P | 1045 | 26.99 | 3 | 459  |
| MYD88 | 3 | Missense | SNP | T | C | c.794T>C | L265P   | 446  | 26.91 | 2 | 493  |
| MYD88 | 3 | Missense | SNP | T | C | c.794T>C | L265P   | 272  | 26.47 | 2 | 999  |
| MYD88 | 3 | Missense | SNP | T | C | c.794T>C | L265P   | 144  | 25.69 | 2 | 1173 |
| MYD88 | 3 | Missense | SNP | T | C | c.794T>C | L265P   | 195  | 25.64 | 2 | 1127 |
| MYD88 | 3 | Missense | SNP | T | C | c.794T>C | L265P   | 145  | 25.52 | 2 | 94   |
| MYD88 | 3 | Missense | SNP | T | C | c.794T>C | L265P   | 193  | 25.39 | 2 | 551  |
| MYD88 | 3 | Missense | SNP | T | C | c.794T>C | L265P   | 189  | 24.87 | 2 | 1428 |
| MYD88 | 3 | Missense | SNP | T | C | c.794T>C | L265P   | 234  | 24.36 | 2 | 1359 |
| MYD88 | 3 | Missense | SNP | T | C | c.794T>C | L265P   | 182  | 24.18 | 2 | 604  |
| MYD88 | 3 | Missense | SNP | T | C | c.794T>C | L265P   | 149  | 24.16 | 2 | 1727 |
| MYD88 | 3 | Missense | SNP | T | C | c.794T>C | L265P   | 232  | 22.41 | 2 | 1306 |
| MYD88 | 3 | Missense | SNP | T | C | c.794T>C | L265P   | 766  | 22.19 | 2 | 278  |
| MYD88 | 3 | Missense | SNP | T | C | c.794T>C | L265P   | 167  | 21.56 | 2 | 247  |
| MYD88 | 3 | Missense | SNP | T | C | c.794T>C | L265P   | 262  | 21.37 | 2 | 1297 |
| MYD88 | 3 | Missense | SNP | T | C | c.794T>C | L265P   | 356  | 21.35 | 2 | 198  |
| MYD88 | 3 | Missense | SNP | T | C | c.794T>C | L265P   | 186  | 20.97 | 2 | 1130 |
| MYD88 | 3 | Missense | SNP | T | C | c.794T>C | L265P   | 263  | 20.91 | 2 | 1104 |
| MYD88 | 3 | Missense | SNP | T | C | c.794T>C | L265P   | 226  | 20.35 | 2 | 1553 |
| MYD88 | 3 | Missense | SNP | T | C | c.794T>C | L265P   | 323  | 20.12 | 2 | 152  |
| MYD88 | 3 | Missense | SNP | T | C | c.794T>C | L265P   | 258  | 19.77 | 2 | 430  |
| MYD88 | 3 | Missense | SNP | T | C | c.794T>C | L265P   | 275  | 19.64 | 2 | 1709 |
| MYD88 | 3 | Missense | SNP | T | C | c.794T>C | p.L265P | 989  | 18.4  | 3 | 1737 |
| MYD88 | 3 | Missense | SNP | T | C | c.794T>C | L265P   | 228  | 17.98 | 2 | 1405 |
| MYD88 | 3 | Missense | SNP | T | C | c.794T>C | L265P   | 221  | 17.19 | 2 | 1472 |
| MYD88 | 3 | Missense | SNP | T | C | c.794T>C | L265P   | 144  | 16.67 | 2 | 1364 |
| MYD88 | 3 | Missense | SNP | T | C | c.794T>C | L265P   | 108  | 16.67 | 2 | 452  |
| MYD88 | 3 | Missense | SNP | T | C | c.794T>C | L265P   | 288  | 16.67 | 2 | 1452 |
| MYD88 | 3 | Missense | SNP | T | C | c.794T>C | p.L265P | 703  | 16.22 | 3 | 1766 |
| MYD88 | 3 | Missense | SNP | T | C | c.794T>C | L265P   | 239  | 15.9  | 2 | 1388 |
| MYD88 | 3 | Missense | SNP | T | C | c.794T>C | L265P   | 211  | 15.64 | 2 | 1710 |

|       |   |          |     |   |   |          |         |      |       |   |      |
|-------|---|----------|-----|---|---|----------|---------|------|-------|---|------|
| MYD88 | 3 | Missense | SNP | T | C | c.794T>C | L265P   | 232  | 15.52 | 2 | 1085 |
| MYD88 | 3 | Missense | SNP | T | C | c.794T>C | L265P   | 137  | 15.33 | 2 | 1713 |
| MYD88 | 3 | Missense | SNP | T | C | c.794T>C | L265P   | 164  | 15.24 | 2 | 1024 |
| MYD88 | 3 | Missense | SNP | T | C | c.794T>C | p.L265P | 1363 | 15.11 | 3 | 1702 |
| MYD88 | 3 | Missense | SNP | T | C | c.794T>C | p.L265P | 985  | 14.92 | 3 | 1769 |
| MYD88 | 3 | Missense | SNP | T | C | c.794T>C | L265P   | 229  | 14.85 | 2 | 592  |
| MYD88 | 3 | Missense | SNP | T | C | c.794T>C | L265P   | 162  | 14.81 | 2 | 1043 |
| MYD88 | 3 | Missense | SNP | T | C | c.794T>C | L265P   | 164  | 14.63 | 2 | 825  |
| MYD88 | 3 | Missense | SNP | T | C | c.794T>C | L265P   | 223  | 14.35 | 2 | 1068 |
| MYD88 | 3 | Missense | SNP | T | C | c.794T>C | L265P   | 231  | 14.29 | 2 | 1007 |
| MYD88 | 3 | Missense | SNP | T | C | c.794T>C | L265P   | 229  | 13.97 | 2 | 1042 |
| MYD88 | 3 | Missense | SNP | T | C | c.794T>C | L265P   | 254  | 13.78 | 2 | 1491 |
| MYD88 | 3 | Missense | SNP | T | C | c.794T>C | L265P   | 291  | 13.4  | 2 | 978  |
| MYD88 | 3 | Missense | SNP | T | C | c.794T>C | L265P   | 324  | 13.27 | 2 | 224  |
| MYD88 | 3 | Missense | SNP | T | C | c.794T>C | L265P   | 288  | 13.19 | 2 | 522  |
| MYD88 | 3 | Missense | SNP | T | C | c.794T>C | L265P   | 184  | 13.04 | 2 | 1168 |
| MYD88 | 3 | Missense | SNP | T | C | c.794T>C | L265P   | 210  | 12.86 | 2 | 353  |
| MYD88 | 3 | Missense | SNP | T | C | c.794T>C | L265P   | 281  | 12.81 | 2 | 1647 |
| MYD88 | 3 | Missense | SNP | T | C | c.794T>C | L265P   | 188  | 12.77 | 2 | 1542 |
| MYD88 | 3 | Missense | SNP | T | C | c.794T>C | L265P   | 192  | 12.5  | 2 | 1382 |
| MYD88 | 3 | Missense | SNP | T | C | c.794T>C | L265P   | 239  | 12.13 | 2 | 1478 |
| MYD88 | 3 | Missense | SNP | T | C | c.794T>C | p.L265P | 727  | 12.1  | 3 | 1768 |
| MYD88 | 3 | Missense | SNP | T | C | c.794T>C | L265P   | 233  | 12.02 | 2 | 599  |
| MYD88 | 3 | Missense | SNP | T | C | c.794T>C | L265P   | 176  | 11.93 | 2 | 994  |
| MYD88 | 3 | Missense | SNP | T | C | c.794T>C | L265P   | 218  | 11.93 | 2 | 277  |
| MYD88 | 3 | Missense | SNP | T | C | c.794T>C | L265P   | 194  | 11.86 | 2 | 1429 |
| MYD88 | 3 | Missense | SNP | T | C | c.794T>C | L265P   | 137  | 11.68 | 2 | 979  |
| MYD88 | 3 | Missense | SNP | T | C | c.794T>C | p.L265P | 1314 | 11.64 | 3 | 1751 |
| MYD88 | 3 | Missense | SNP | T | C | c.794T>C | L265P   | 417  | 11.51 | 2 | 43   |
| MYD88 | 3 | Missense | SNP | T | C | c.794T>C | L265P   | 210  | 11.43 | 2 | 1420 |
| MYD88 | 3 | Missense | SNP | T | C | c.794T>C | L265P   | 251  | 11.16 | 2 | 1556 |
| MYD88 | 3 | Missense | SNP | T | C | c.794T>C | L265P   | 242  | 11.16 | 2 | 1602 |
| MYD88 | 3 | Missense | SNP | T | C | c.794T>C | L265P   | 181  | 11.05 | 2 | 1020 |
| MYD88 | 3 | Missense | SNP | T | C | c.794T>C | L265P   | 156  | 10.9  | 2 | 959  |
| MYD88 | 3 | Missense | SNP | T | C | c.794T>C | L265P   | 232  | 10.78 | 2 | 517  |
| MYD88 | 3 | Missense | SNP | T | C | c.794T>C | L265P   | 233  | 10.73 | 2 | 735  |
| MYD88 | 3 | Missense | SNP | T | C | c.794T>C | L265P   | 255  | 10.59 | 2 | 1117 |
| MYD88 | 3 | Missense | SNP | T | C | c.794T>C | L265P   | 172  | 10.47 | 2 | 998  |
| MYD88 | 3 | Missense | SNP | T | C | c.794T>C | L265P   | 193  | 10.36 | 2 | 845  |
| MYD88 | 3 | Missense | SNP | T | C | c.794T>C | L265P   | 196  | 10.2  | 2 | 471  |
| MYD88 | 3 | Missense | SNP | T | C | c.794T>C | L265P   | 255  | 10.2  | 2 | 1613 |

|       |   |          |     |   |   |          |         |     |       |   |      |
|-------|---|----------|-----|---|---|----------|---------|-----|-------|---|------|
| MYD88 | 3 | Missense | SNP | T | C | c.794T>C | p.L265P | 178 | 10.11 | 2 | 187  |
| MYD88 | 3 | Missense | SNP | T | C | c.794T>C | L265P   | 172 | 9.88  | 2 | 1521 |
| MYD88 | 3 | Missense | SNP | T | C | c.794T>C | L265P   | 204 | 9.8   | 2 | 1110 |
| MYD88 | 3 | Missense | SNP | T | C | c.794T>C | L265P   | 236 | 9.75  | 2 | 1571 |
| MYD88 | 3 | Missense | SNP | T | C | c.794T>C | L265P   | 267 | 9.74  | 2 | 1256 |
| MYD88 | 3 | Missense | SNP | T | C | c.794T>C | L265P   | 175 | 9.71  | 2 | 139  |
| MYD88 | 3 | Missense | SNP | T | C | c.794T>C | L265P   | 239 | 9.62  | 2 | 1319 |
| MYD88 | 3 | Missense | SNP | T | C | c.794T>C | L265P   | 148 | 9.46  | 2 | 1323 |
| MYD88 | 3 | Missense | SNP | T | C | c.794T>C | L265P   | 233 | 9.44  | 2 | 411  |
| MYD88 | 3 | Missense | SNP | T | C | c.794T>C | p.L265P | 203 | 9.36  | 2 | 1733 |
| MYD88 | 3 | Missense | SNP | T | C | c.794T>C | L265P   | 142 | 9.15  | 2 | 1159 |
| MYD88 | 3 | Missense | SNP | T | C | c.794T>C | L265P   | 199 | 9.05  | 2 | 985  |
| MYD88 | 3 | Missense | SNP | T | C | c.794T>C | L265P   | 210 | 9.05  | 2 | 145  |
| MYD88 | 3 | Missense | SNP | T | C | c.794T>C | L265P   | 215 | 8.84  | 2 | 1296 |
| MYD88 | 3 | Missense | SNP | T | C | c.794T>C | L265P   | 215 | 8.84  | 2 | 1379 |
| MYD88 | 3 | Missense | SNP | T | C | c.794T>C | L265P   | 249 | 8.84  | 2 | 506  |
| MYD88 | 3 | Missense | SNP | T | C | c.794T>C | L265P   | 216 | 8.8   | 2 | 948  |
| MYD88 | 3 | Missense | SNP | T | C | c.794T>C | L265P   | 218 | 8.72  | 2 | 201  |
| MYD88 | 3 | Missense | SNP | T | C | c.794T>C | L265P   | 161 | 8.7   | 2 | 1167 |
| MYD88 | 3 | Missense | SNP | T | C | c.794T>C | L265P   | 242 | 8.68  | 2 | 1570 |
| MYD88 | 3 | Missense | SNP | T | C | c.794T>C | L265P   | 304 | 8.55  | 2 | 1706 |
| MYD88 | 3 | Missense | SNP | T | C | c.794T>C | L265P   | 211 | 8.53  | 2 | 1090 |
| MYD88 | 3 | Missense | SNP | T | C | c.794T>C | L265P   | 165 | 8.48  | 2 | 620  |
| MYD88 | 3 | Missense | SNP | T | C | c.794T>C | L265P   | 201 | 8.46  | 2 | 1234 |
| MYD88 | 3 | Missense | SNP | T | C | c.794T>C | L265P   | 142 | 8.45  | 2 | 719  |
| MYD88 | 3 | Missense | SNP | T | C | c.794T>C | L265P   | 242 | 8.26  | 2 | 1717 |
| MYD88 | 3 | Missense | SNP | T | C | c.794T>C | L265P   | 134 | 8.21  | 2 | 527  |
| MYD88 | 3 | Missense | SNP | T | C | c.794T>C | L265P   | 260 | 8.08  | 2 | 358  |
| MYD88 | 3 | Missense | SNP | T | C | c.794T>C | L265P   | 252 | 7.94  | 2 | 441  |
| MYD88 | 3 | Missense | SNP | T | C | c.794T>C | L265P   | 164 | 7.93  | 2 | 774  |
| MYD88 | 3 | Missense | SNP | T | C | c.794T>C | L265P   | 190 | 7.89  | 2 | 1628 |
| MYD88 | 3 | Missense | SNP | T | C | c.794T>C | p.L265P | 206 | 7.77  | 2 | 1477 |
| MYD88 | 3 | Missense | SNP | T | C | c.794T>C | L265P   | 233 | 7.73  | 2 | 1502 |
| MYD88 | 3 | Missense | SNP | T | C | c.794T>C | p.L265P | 261 | 7.66  | 2 | 377  |
| MYD88 | 3 | Missense | SNP | T | C | c.794T>C | L265P   | 185 | 7.57  | 2 | 489  |
| MYD88 | 3 | Missense | SNP | T | C | c.794T>C | L265P   | 265 | 7.55  | 2 | 468  |
| MYD88 | 3 | Missense | SNP | T | C | c.794T>C | L265P   | 187 | 7.49  | 2 | 1161 |
| MYD88 | 3 | Missense | SNP | T | C | c.794T>C | L265P   | 205 | 7.32  | 2 | 1495 |
| MYD88 | 3 | Missense | SNP | T | C | c.794T>C | L265P   | 263 | 7.22  | 2 | 1361 |
| MYD88 | 3 | Missense | SNP | T | C | c.794T>C | L265P   | 156 | 7.05  | 2 | 1366 |
| MYD88 | 3 | Missense | SNP | T | C | c.794T>C | L265P   | 227 | 7.05  | 2 | 113  |

|       |   |          |     |   |   |          |         |     |      |   |      |
|-------|---|----------|-----|---|---|----------|---------|-----|------|---|------|
| MYD88 | 3 | Missense | SNP | T | C | c.794T>C | L265P   | 186 | 6.99 | 2 | 1061 |
| MYD88 | 3 | Missense | SNP | T | C | c.794T>C | L265P   | 290 | 6.9  | 2 | 563  |
| MYD88 | 3 | Missense | SNP | T | C | c.794T>C | p.L265P | 175 | 6.86 | 2 | 1557 |
| MYD88 | 3 | Missense | SNP | T | C | c.794T>C | L265P   | 163 | 6.75 | 2 | 399  |
| MYD88 | 3 | Missense | SNP | T | C | c.794T>C | L265P   | 283 | 6.71 | 2 | 641  |
| MYD88 | 3 | Missense | SNP | T | C | c.794T>C | L265P   | 346 | 6.65 | 2 | 289  |
| MYD88 | 3 | Missense | SNP | T | C | c.794T>C | L265P   | 212 | 6.6  | 2 | 243  |
| MYD88 | 3 | Missense | SNP | T | C | c.794T>C | L265P   | 214 | 6.54 | 2 | 1679 |
| MYD88 | 3 | Missense | SNP | T | C | c.794T>C | L265P   | 276 | 6.52 | 2 | 1712 |
| MYD88 | 3 | Missense | SNP | T | C | c.794T>C | L265P   | 415 | 6.51 | 2 | 869  |
| MYD88 | 3 | Missense | SNP | T | C | c.794T>C | L265P   | 156 | 6.41 | 2 | 1277 |
| MYD88 | 3 | Missense | SNP | T | C | c.794T>C | L265P   | 250 | 6.4  | 2 | 1333 |
| MYD88 | 3 | Missense | SNP | T | C | c.794T>C | L265P   | 219 | 6.39 | 2 | 1338 |
| MYD88 | 3 | Missense | SNP | T | C | c.794T>C | L265P   | 440 | 6.36 | 2 | 282  |
| MYD88 | 3 | Missense | SNP | T | C | c.794T>C | L265P   | 192 | 6.25 | 2 | 569  |
| MYD88 | 3 | Missense | SNP | T | C | c.794T>C | L265P   | 197 | 6.09 | 2 | 445  |
| MYD88 | 3 | Missense | SNP | T | C | c.794T>C | L265P   | 183 | 6.01 | 2 | 1307 |
| MYD88 | 3 | Missense | SNP | T | C | c.794T>C | p.L265P | 303 | 5.94 | 2 | 1761 |
| MYD88 | 3 | Missense | SNP | T | C | c.794T>C | L265P   | 186 | 5.91 | 2 | 541  |
| MYD88 | 3 | Missense | SNP | T | C | c.794T>C | L265P   | 203 | 5.91 | 2 | 1728 |
| MYD88 | 3 | Missense | SNP | T | C | c.794T>C | L265P   | 241 | 5.81 | 2 | 1309 |
| MYD88 | 3 | Missense | SNP | T | C | c.794T>C | p.L265P | 729 | 5.76 | 3 | 1771 |
| MYD88 | 3 | Missense | SNP | T | C | c.794T>C | L265P   | 261 | 5.75 | 2 | 1120 |
| MYD88 | 3 | Missense | SNP | T | C | c.794T>C | L265P   | 316 | 5.7  | 2 | 705  |
| MYD88 | 3 | Missense | SNP | T | C | c.794T>C | L265P   | 217 | 5.53 | 2 | 761  |
| MYD88 | 3 | Missense | SNP | T | C | c.794T>C | L265P   | 256 | 5.47 | 2 | 1341 |
| MYD88 | 3 | Missense | SNP | T | C | c.794T>C | L265P   | 274 | 5.47 | 2 | 1681 |
| MYD88 | 3 | Missense | SNP | T | C | c.794T>C | L265P   | 187 | 5.35 | 2 | 143  |
| MYD88 | 3 | Missense | SNP | T | C | c.794T>C | L265P   | 206 | 5.34 | 2 | 1126 |
| MYD88 | 3 | Missense | SNP | T | C | c.794T>C | L265P   | 225 | 5.33 | 2 | 1137 |
| MYD88 | 3 | Missense | SNP | T | C | c.794T>C | L265P   | 210 | 5.24 | 2 | 168  |
| MYD88 | 3 | Missense | SNP | T | C | c.794T>C | L265P   | 210 | 5.24 | 2 | 431  |
| MYD88 | 3 | Missense | SNP | T | C | c.794T>C | p.L265P | 383 | 5.23 | 2 | 931  |
| MYD88 | 3 | Missense | SNP | T | C | c.794T>C | L265P   | 250 | 5.2  | 2 | 1565 |
| MYD88 | 3 | Missense | SNP | T | C | c.794T>C | L265P   | 214 | 5.14 | 2 | 394  |
| MYD88 | 3 | Missense | SNP | T | C | c.794T>C | L265P   | 235 | 5.11 | 2 | 909  |
| MYD88 | 3 | Missense | SNP | T | C | c.794T>C | L265P   | 197 | 5.08 | 2 | 1179 |
| MYD88 | 3 | Missense | SNP | T | C | c.794T>C | L265P   | 261 | 4.98 | 2 | 907  |
| MYD88 | 3 | Missense | SNP | T | C | c.794T>C | L265P   | 322 | 4.97 | 2 | 658  |
| MYD88 | 3 | Missense | SNP | T | C | c.794T>C | L265P   | 289 | 4.84 | 2 | 975  |
| MYD88 | 3 | Missense | SNP | T | C | c.794T>C | L265P   | 269 | 4.83 | 2 | 1008 |



|       |   |          |     |   |   |          |         |      |       |   |      |
|-------|---|----------|-----|---|---|----------|---------|------|-------|---|------|
| MYD88 | 3 | Missense | SNP | T | C | c.794T>C | p.L265P | 414  | 4.83  | 3 | 1787 |
| MYD88 | 3 | Missense | SNP | T | C | c.794T>C | L265P   | 235  | 4.68  | 2 | 933  |
| MYD88 | 3 | Missense | SNP | T | C | c.794T>C | p.L265P | 340  | 4.52  | 2 | 1525 |
| MYD88 | 3 | Missense | SNP | T | C | c.794T>C | L265P   | 155  | 4.516 | 2 | 1162 |
| MYD88 | 3 | Missense | SNP | T | C | c.794T>C | L265P   | 184  | 4.348 | 2 | 357  |
| MYD88 | 3 | Missense | SNP | T | C | c.794T>C | L265P   | 231  | 4.33  | 2 | 1106 |
| MYD88 | 3 | Missense | SNP | T | C | c.794T>C | L265P   | 278  | 4.32  | 2 | 608  |
| MYD88 | 3 | Missense | SNP | T | C | c.794T>C | L265P   | 302  | 4.3   | 2 | 903  |
| MYD88 | 3 | Missense | SNP | T | C | c.794T>C | p.L265P | 967  | 4.24  | 3 | 158  |
| MYD88 | 3 | Missense | SNP | T | C | c.794T>C | L265P   | 332  | 4.217 | 2 | 385  |
| MYD88 | 3 | Missense | SNP | T | C | c.794T>C | L265P   | 288  | 4.17  | 2 | 1462 |
| MYD88 | 3 | Missense | SNP | T | C | c.794T>C | L265P   | 168  | 4.167 | 2 | 555  |
| MYD88 | 3 | Missense | SNP | T | C | c.794T>C | L265P   | 169  | 4.142 | 2 | 1036 |
| MYD88 | 3 | Missense | SNP | T | C | c.794T>C | L265P   | 291  | 4.12  | 2 | 897  |
| MYD88 | 3 | Missense | SNP | T | C | c.794T>C | L265P   | 195  | 4.103 | 2 | 1086 |
| MYD88 | 3 | Missense | SNP | T | C | c.794T>C | L265P   | 246  | 4.07  | 2 | 857  |
| MYD88 | 3 | Missense | SNP | T | C | c.794T>C | p.L265P | 1089 | 4.04  | 3 | 341  |
| MYD88 | 3 | Missense | SNP | T | C | c.794T>C | L265P   | 200  | 4     | 2 | 1009 |
| MYD88 | 3 | Missense | SNP | T | C | c.794T>C | L265P   | 275  | 4     | 2 | 1538 |
| MYD88 | 3 | Missense | SNP | T | C | c.794T>C | L265P   | 299  | 4     | 2 | 1547 |
| MYD88 | 3 | Missense | SNP | T | C | c.794T>C | L265P   | 201  | 3.98  | 2 | 62   |
| MYD88 | 3 | Missense | SNP | T | C | c.794T>C | L265P   | 251  | 3.98  | 2 | 378  |
| MYD88 | 3 | Missense | SNP | T | C | c.794T>C | L265P   | 480  | 3.96  | 2 | 800  |
| MYD88 | 3 | Missense | SNP | T | C | c.794T>C | p.L265P | 600  | 3.83  | 3 | 1755 |
| MYD88 | 3 | Missense | SNP | T | C | c.794T>C | L265P   | 183  | 3.825 | 2 | 1005 |
| MYD88 | 3 | Missense | SNP | T | C | c.794T>C | L265P   | 185  | 3.784 | 2 | 1148 |
| MYD88 | 3 | Missense | SNP | T | C | c.794T>C | p.L265P | 1084 | 3.78  | 3 | 696  |
| MYD88 | 3 | Missense | SNP | T | C | c.794T>C | L265P   | 381  | 3.67  | 2 | 488  |
| MYD88 | 3 | Missense | SNP | T | C | c.794T>C | L265P   | 164  | 3.659 | 2 | 1138 |
| MYD88 | 3 | Missense | SNP | T | C | c.794T>C | L265P   | 550  | 3.64  | 2 | 381  |
| MYD88 | 3 | Missense | SNP | T | C | c.794T>C | L265P   | 275  | 3.64  | 2 | 874  |
| MYD88 | 3 | Missense | SNP | T | C | c.794T>C | L265P   | 278  | 3.6   | 2 | 1091 |
| MYD88 | 3 | Missense | SNP | T | C | c.794T>C | L265P   | 281  | 3.56  | 2 | 1347 |
| MYD88 | 3 | Missense | SNP | T | C | c.794T>C | L265P   | 229  | 3.493 | 2 | 130  |
| MYD88 | 3 | Missense | SNP | T | C | c.794T>C | L265P   | 180  | 3.333 | 2 | 324  |
| MYD88 | 3 | Missense | SNP | T | C | c.794T>C | L265P   | 332  | 3.31  | 2 | 715  |
| MYD88 | 3 | Missense | SNP | T | C | c.794T>C | p.L265P | 708  | 3.25  | 3 | 1588 |
| MYD88 | 3 | Missense | SNP | T | C | c.794T>C | L265P   | 228  | 3.07  | 2 | 704  |
| MYD88 | 3 | Missense | SNP | T | C | c.794T>C | L265P   | 232  | 3.017 | 2 | 662  |
| MYD88 | 3 | Missense | SNP | T | C | c.794T>C | L265P   | 235  | 2.979 | 2 | 1295 |
| MYD88 | 3 | Missense | SNP | T | C | c.794T>C | L265P   | 270  | 2.963 | 2 | 128  |

|       |   |          |     |   |   |          |         |     |       |   |      |
|-------|---|----------|-----|---|---|----------|---------|-----|-------|---|------|
| MYD88 | 3 | Missense | SNP | T | C | c.794T>C | L265P   | 476 | 2.94  | 2 | 655  |
| MYD88 | 3 | Missense | SNP | T | C | c.794T>C | L265P   | 173 | 2.89  | 2 | 996  |
| MYD88 | 3 | Missense | SNP | T | C | c.854T>C | L265P   | 438 | 2.87  | 2 | 1636 |
| MYD88 | 3 | Missense | SNP | T | C | c.794T>C | L265P   | 387 | 2.84  | 2 | 1653 |
| MYD88 | 3 | Missense | SNP | T | C | c.794T>C | L265P   | 143 | 2.797 | 2 | 769  |
| MYD88 | 3 | Missense | SNP | T | C | c.794T>C | L265P   | 179 | 2.793 | 2 | 416  |
| MYD88 | 3 | Missense | SNP | T | C | c.794T>C | L265P   | 257 | 2.724 | 2 | 1119 |
| MYD88 | 3 | Missense | SNP | T | C | c.794T>C | L265P   | 258 | 2.713 | 2 | 754  |
| MYD88 | 3 | Missense | SNP | T | C | c.794T>C | L265P   | 370 | 2.703 | 2 | 649  |
| MYD88 | 3 | Missense | SNP | T | C | c.794T>C | L265P   | 389 | 2.7   | 2 | 1691 |
| MYD88 | 3 | Missense | SNP | T | C | c.794T>C | L265P   | 335 | 2.687 | 2 | 433  |
| MYD88 | 3 | Missense | SNP | T | C | c.794T>C | L265P   | 227 | 2.643 | 2 | 1308 |
| MYD88 | 3 | Missense | SNP | T | C | c.794T>C | L265P   | 346 | 2.6   | 2 | 125  |
| MYD88 | 3 | Missense | SNP | T | C | c.794T>C | L265P   | 390 | 2.564 | 2 | 100  |
| MYD88 | 3 | Missense | SNP | T | C | c.794T>C | L265P   | 157 | 2.548 | 2 | 867  |
| MYD88 | 3 | Missense | SNP | T | C | c.794T>C | L265P   | 317 | 2.524 | 2 | 750  |
| MYD88 | 3 | Missense | SNP | T | C | c.794T>C | p.L265P | 590 | 2.48  | 2 | 961  |
| MYD88 | 3 | Missense | SNP | T | C | c.794T>C | L265P   | 202 | 2.475 | 2 | 1236 |
| MYD88 | 3 | Missense | SNP | T | C | c.794T>C | L265P   | 572 | 2.43  | 2 | 1574 |
| MYD88 | 3 | Missense | SNP | T | C | c.794T>C | L265P   | 420 | 2.381 | 2 | 659  |
| MYD88 | 3 | Missense | SNP | T | C | c.794T>C | L265P   | 173 | 2.312 | 2 | 419  |
| MYD88 | 3 | Missense | SNP | T | C | c.794T>C | p.L265P | 828 | 2.29  | 3 | 252  |
| MYD88 | 3 | Missense | SNP | T | C | c.794T>C | L265P   | 220 | 2.273 | 2 | 293  |
| MYD88 | 3 | Missense | SNP | T | C | c.794T>C | L265P   | 222 | 2.252 | 2 | 475  |
| MYD88 | 3 | Missense | SNP | T | C | c.794T>C | L265P   | 222 | 2.252 | 2 | 448  |
| MYD88 | 3 | Missense | SNP | T | C | c.794T>C | L265P   | 185 | 2.162 | 2 | 953  |
| MYD88 | 3 | Missense | SNP | T | C | c.794T>C | L265P   | 464 | 2.155 | 2 | 1260 |
| MYD88 | 3 | Missense | SNP | T | C | c.794T>C | L265P   | 392 | 2.041 | 2 | 822  |
| MYD88 | 3 | Missense | SNP | T | C | c.794T>C | L265P   | 198 | 2.02  | 2 | 1244 |
| MYD88 | 3 | Missense | SNP | T | C | c.794T>C | L265P   | 200 | 2     | 2 | 1322 |
| MYD88 | 3 | Missense | SNP | T | C | c.794T>C | L265P   | 357 | 2     | 2 | 878  |
| MYD88 | 3 | Missense | SNP | T | C | c.794T>C | L265P   | 162 | 1.852 | 2 | 51   |
| MYD88 | 3 | Missense | SNP | T | C | c.794T>C | L265P   | 217 | 1.843 | 2 | 570  |
| MYD88 | 3 | Missense | SNP | T | C | c.794T>C | L265P   | 222 | 1.802 | 2 | 947  |
| MYD88 | 3 | Missense | SNP | T | C | c.794T>C | L265P   | 222 | 1.802 | 2 | 622  |
| MYD88 | 3 | Missense | SNP | T | C | c.794T>C | L265P   | 167 | 1.796 | 2 | 986  |
| MYD88 | 3 | Missense | SNP | T | C | c.794T>C | L265P   | 230 | 1.739 | 2 | 991  |
| MYD88 | 3 | Missense | SNP | T | C | c.794T>C | L265P   | 298 | 1.678 | 2 | 549  |
| MYD88 | 3 | Missense | SNP | T | C | c.794T>C | L265P   | 363 | 1.653 | 2 | 685  |
| MYD88 | 3 | Missense | SNP | T | C | c.794T>C | L265P   | 305 | 1.639 | 2 | 167  |
| MYD88 | 3 | Missense | SNP | T | C | c.794T>C | L265P   | 496 | 1.61  | 2 | 1683 |

|        |    |             |     |              |    |                           |              |      |       |   |      |
|--------|----|-------------|-----|--------------|----|---------------------------|--------------|------|-------|---|------|
| MYD88  | 3  | Missense    | SNP | T            | C  | c.794T>C                  | L265P        | 373  | 1.609 | 2 | 692  |
| MYD88  | 3  | Missense    | SNP | T            | C  | c.794T>C                  | p.L265P      | 1012 | 1.58  | 3 | 1740 |
| MYD88  | 3  | Missense    | SNP | T            | C  | c.794T>C                  | L265P        | 191  | 1.571 | 2 | 545  |
| MYD88  | 3  | Missense    | SNP | T            | C  | c.794T>C                  | L265P        | 196  | 1.531 | 2 | 615  |
| MYD88  | 3  | Missense    | SNP | T            | C  | c.794T>C                  | L265P        | 203  | 1.478 | 2 | 401  |
| MYD88  | 3  | Missense    | SNP | T            | C  | c.794T>C                  | L265P        | 205  | 1.463 | 2 | 779  |
| MYD88  | 3  | Missense    | SNP | T            | C  | c.794T>C                  | L265P        | 624  | 1.4   | 2 | 507  |
| MYD88  | 3  | Missense    | SNP | T            | C  | c.794T>C                  | L265P        | 793  | 1.387 | 2 | 461  |
| MYD88  | 3  | Missense    | SNP | T            | C  | c.794T>C                  | L265P        | 217  | 1.382 | 2 | 82   |
| MYD88  | 3  | Missense    | SNP | T            | C  | c.794T>C                  | L265P        | 221  | 1.357 | 2 | 628  |
| MYD88  | 3  | Missense    | SNP | T            | C  | c.794T>C                  | L265P        | 302  | 1.325 | 2 | 532  |
| MYD88  | 3  | Missense    | SNP | T            | C  | c.794T>C                  | L265P        | 462  | 1.299 | 2 | 733  |
| MYD88  | 3  | Missense    | SNP | T            | C  | c.794T>C                  | p.L265P      | 235  | 1.28  | 2 | 1736 |
| MYD88  | 3  | Missense    | SNP | T            | C  | c.794T>C                  | L265P        | 239  | 1.255 | 2 | 1135 |
| MYD88  | 3  | Missense    | SNP | T            | C  | c.794T>C                  | L265P        | 239  | 1.255 | 2 | 1063 |
| MYD88  | 3  | Missense    | SNP | T            | C  | c.794T>C                  | L265P        | 251  | 1.195 | 2 | 593  |
| MYD88  | 3  | Missense    | SNP | T            | C  | c.794T>C                  | L265P        | 348  | 1.149 | 2 | 390  |
| MYD88  | 3  | Missense    | SNP | T            | C  | c.794T>C                  | p.L265P      | 964  | 1.14  | 3 | 466  |
| MYD88  | 3  | Missense    | SNP | T            | C  | c.794T>C                  | L265P        | 442  | 1.131 | 2 | 346  |
| MYD88  | 3  | Missense    | SNP | T            | C  | c.794T>C                  | L265P        | 180  | 1.111 | 2 | 456  |
| MYD88  | 3  | Missense    | SNP | T            | C  | c.794T>C                  | L265P        | 288  | 1.042 | 2 | 336  |
| MYD88  | 3  | Missense    | SNP | T            | C  | c.794T>C                  | L265P        | 392  | 1.02  | 2 | 1228 |
| MYD88  | 3  | Missense    | SNP | T            | C  | c.794T>C                  | L265P        | 300  | 1     | 2 | 1259 |
| MYD88  | 3  | Missense    | SNP | T            | C  | c.794T>C                  | L265P        | 428  | 0.935 | 2 | 849  |
| MYD88  | 3  | Missense    | SNP | T            | C  | c.794T>C                  | p.L265P      | 808  | 0.87  | 3 | 164  |
| MYD88  | 3  | Missense    | SNP | T            | C  | c.794T>C                  | p.L265P      | 1145 | 0.87  | 3 | 932  |
| MYD88  | 3  | Missense    | SNP | T            | C  | c.794T>C                  | p.L265P      | 817  | 0.86  | 3 | 1775 |
| MYD88  | 3  | Missense    | SNP | T            | C  | c.794T>C                  | p.L265P      | 970  | 0.82  | 3 | 1498 |
| MYD88  | 3  | Missense    | SNP | T            | C  | c.794T>C                  | p.L265P      | 646  | 0.77  | 3 | 928  |
| MYD88  | 3  | Missense    | SNP | T            | C  | c.794T>C                  | L265P        | 182  | 0.549 | 2 | 120  |
| MYD88  | 3  | Missense    | SNP | T            | C  | c.794T>C                  | L265P        | 375  | 0.533 | 2 | 866  |
| MYD88  | 3  | Missense    | SNP | T            | C  | c.794T>C                  | L265P        | 222  | 0.45  | 2 | 227  |
| MYD88  | 3  | Missense    | SNP | T            | C  | c.794T>C                  | p.L265P      | 803  | 0.37  | 3 | 703  |
| MYD88  | 3  | Missense    | SNP | T            | C  | c.794T>C                  | p.L265P      | 1441 | 0.07  | 3 | 1648 |
| NF1    | 17 | Splice site | SNP | T            | A  | c.2850+2T>A               | null         | 579  | 2.42  | 3 | 1762 |
| NOTCH1 | 9  | Missense    | SNP | T            | C  | c.4451A>G                 | p.N1484S     | 1287 | 19.58 | 3 | 1702 |
| NOTCH1 | 9  | Frameshift  | DEL | CAG          | C  | c.7543_7544delCT          | P2514fs*     | 989  | 2.63  | 2 | 1079 |
| NOTCH2 | 1  | Frameshift  | DEL | TG           | T  | c.6910delG                | P2303fs*     | 1445 | 2.08  | 2 | 641  |
| NRAS   | 1  | Missense    | SNP | C            | T  | c.35G>A                   | G12D         | 1104 | 5.07  | 2 | 126  |
| PPM1D  | 17 | Nonsense    | SNP | C            | T  | c.1654C>T                 | p.R552*      | 1762 | 6.7   | 3 | 928  |
| PPM1D  | 17 | Frameshift  | DEL | ATTCTGGCCCCC | A  | c.1626_1636delTTCTGGCCCCC | p.S543Dfs*5  | 1708 | 3.22  | 3 | 928  |
| PPM1D  | 17 | Frameshift  | INS | C            | CA | c.1547_1548insA           | p.T517Nfs*11 | 1276 | 2.19  | 3 | 158  |

|        |    |            |     |                 |       |                      |                |      |       |   |      |
|--------|----|------------|-----|-----------------|-------|----------------------|----------------|------|-------|---|------|
| RAD21  | 8  | Deletion   | DEL | TTTG            | T     | c.1385_1387delCAA    | T461del        | 173  | 44.51 | 2 | 830  |
| RUNX1  | 21 | Frameshift | INS | C               | CG    | c.1037_1037insC      | R346fs*        | 298  | 45.97 | 2 | 136  |
| RUNX1  | 21 | Frameshift | INS | G               | GACCA | c.390_390insTGGT     | V131fs*        | 952  | 20.48 | 2 | 511  |
| RUNX1  | 21 | Frameshift | INS | C               | CAT   | c.1254_1254insAT     | M419fs*        | 226  | 17.7  | 2 | 338  |
| RUNX1  | 21 | Frameshift | INS | C               | CAG   | c.296_296insCT       | C99fs*         | 266  | 13.53 | 2 | 377  |
| RUNX1  | 21 | Frameshift | INS | C               | CT    | c.427_427insA        | A142fs*        | 494  | 7.89  | 2 | 123  |
| SF3B1  | 2  | Missense   | SNP | C               | G     | c.1998G>C            | K666N          | 307  | 33.88 | 2 | 1529 |
| SF3B1  | 2  | Missense   | SNP | T               | C     | c.2098A>G            | K700E          | 355  | 27.04 | 2 | 143  |
| SF3B1  | 2  | Missense   | SNP | C               | A     | c.1998G>T            | K666N          | 498  | 25.7  | 2 | 1650 |
| SF3B1  | 2  | Missense   | SNP | T               | C     | c.2098A>G            | K700E          | 385  | 7.01  | 2 | 380  |
| SF3B1  | 2  | Missense   | SNP | T               | C     | c.2098A>G            | K700E          | 1081 | 4.35  | 2 | 69   |
| SF3B1  | 2  | Missense   | SNP | T               | C     | c.2098A>G            | K700E          | 390  | 4.1   | 2 | 1286 |
| SF3B1  | 2  | Missense   | SNP | T               | C     | c.2098A>G            | K700E          | 372  | 4.03  | 2 | 1331 |
| SH2B3  | 12 | Missense   | SNP | G               | A     | c.1198G>A            | E400K          | 97   | 53.61 | 2 | 614  |
| SH2B3  | 12 | Missense   | SNP | T               | C     | c.1201T>C            | Y401H          | 144  | 49.31 | 2 | 1701 |
| SH2B3  | 12 | Missense   | SNP | G               | A     | c.1183G>A            | E395K          | 353  | 48.73 | 2 | 1235 |
| SH2B3  | 12 | Missense   | SNP | G               | A     | c.1198G>A            | E400K          | 136  | 47.79 | 2 | 1491 |
| SH2B3  | 12 | Missense   | SNP | G               | A     | c.1114G>A            | p.V372M        | 1508 | 44.3  | 3 | 1610 |
| SH2B3  | 12 | Missense   | SNP | C               | T     | c.1187C>T            | T396M          | 153  | 42.48 | 2 | 570  |
| SH2B3  | 12 | Missense   | SNP | C               | T     | c.724C>T             | P242S          | 34   | 38.24 | 2 | 1012 |
| SH2B3  | 12 | Frameshift | INS | G               | GCT   | c.1037_1038insCT     | G346fs*        | 2212 | 6.87  | 2 | 888  |
| SH2B3  | 12 | Missense   | SNP | T               | G     | c.1291T>G            | p.F431V        | 1243 | 3.38  | 3 | 1771 |
| SMC1A  | X  | Deletion   | DEL | CCTT            | C     | c.805_807delAAG      | 268delK        | 88   | 17.05 | 2 | 911  |
| SRSF2  | 17 | Missense   | SNP | G               | C     | c.284C>G             | P95R           | 145  | 56.55 | 2 | 1661 |
| SRSF2  | 17 | Missense   | SNP | G               | T     | c.284C>A             | P95H           | 136  | 51.47 | 2 | 136  |
| SRSF2  | 17 | Missense   | SNP | G               | A     | c.284C>T             | P95L           | 109  | 32.11 | 2 | 1014 |
| SRSF2  | 17 | Missense   | SNP | G               | A     | c.284C>T             | P95L           | 101  | 31.68 | 2 | 511  |
| SRSF2  | 17 | Missense   | SNP | G               | A     | c.284C>T             | P95L           | 54   | 27.78 | 2 | 1529 |
| SRSF2  | 17 | Missense   | SNP | G               | T     | c.284C>A             | P95H           | 116  | 21.55 | 2 | 324  |
| SRSF2  | 17 | Missense   | SNP | G               | T     | c.284C>A             | P95H           | 156  | 16.67 | 2 | 126  |
| SRSF2  | 17 | Missense   | SNP | G               | C     | c.284C>G             | p.P95R         | 1472 | 5.64  | 3 | 304  |
| STA G2 | X  | Frameshift | INS | A               | AT    | c.59_60insT          | H20fs*         | 646  | 95.2  | 2 | 1661 |
| STA G2 | X  | Frameshift | DEL | CG              | C     | c.3398delG           | R1133fs*       | 316  | 7.91  | 2 | 40   |
| STA G2 | X  | Nonsense   | SNP | G               | T     | c.3283G>T            | E1095*         | 592  | 6.93  | 2 | 1161 |
| TET2   | 4  | Frameshift | INS | C               | CT    | c.3809_3810insT      | T1270fs*       | 533  | 71.86 | 2 | 774  |
| TET2   | 4  | Missense   | SNP | G               | A     | c.3515G>A            | G1172D         | 1555 | 52.15 | 2 | 1579 |
| TET2   | 4  | Missense   | SNP | A               | G     | c.3443A>G            | Y1148C         | 2967 | 50.83 | 2 | 165  |
| TET2   | 4  | Missense   | SNP | C               | G     | c.3609C>G            | S1203R         | 292  | 48.29 | 2 | 1502 |
| TET2   | 4  | Deletion   | DEL | AGAGCAT         | A     | c.5715_5720delGAGCAT | 1906_1907delSM | 78   | 47.44 | 2 | 43   |
| TET2   | 4  | Frameshift | INS | C               | CG    | c.3458_3459insG      | A1153fs*       | 2159 | 47.01 | 2 | 1014 |
| TET2   | 4  | Frameshift | INS | G               | GT    | c.5633_5634insT      | R1878fs*       | 85   | 45.88 | 2 | 1014 |
| TET2   | 4  | Missense   | SNP | G               | A     | c.3637G>A            | V1213M         | 273  | 43.59 | 2 | 856  |
| TET2   | 4  | Missense   | SNP | C               | G     | c.5821C>G            | P1941A         | 979  | 43.41 | 2 | 620  |
| TET2   | 4  | Frameshift | DEL | TC              | T     | c.822delC            | I274fs*        | 1256 | 41.64 | 2 | 126  |
| TET2   | 4  | Frameshift | DEL | TTCATGGAGCATGTA | C     | c.3867_3881delinsC   | S1292fs*       | 750  | 38.53 | 2 | 1235 |
| TET2   | 4  | Frameshift | DEL | TTC             | T     | c.4251_4252delITC    | V1417fs*       | 302  | 38.41 | 2 | 1416 |
| TET2   | 4  | Frameshift | DEL | GC              | G     | c.2965delC           | K988fs*        | 856  | 37.73 | 2 | 126  |
| TET2   | 4  | Missense   | SNP | T               | G     | c.3491T>G            | p.M1164R       | 379  | 36.68 | 3 | 1780 |

|        |    |            |     |                      |      |                                    |               |      |       |   |      |
|--------|----|------------|-----|----------------------|------|------------------------------------|---------------|------|-------|---|------|
| TET2   | 4  | Missense   | SNP | G                    | A    | c.3893G>A                          | C1298Y        | 1388 | 36.53 | 2 | 1416 |
| TET2   | 4  | Missense   | SNP | C                    | T    | c.5627C>T                          | A1876V        | 109  | 19.27 | 2 | 760  |
| TET2   | 4  | Frameshift | INS | G                    | GT   | c.874_875insT                      | V292fs*       | 2228 | 15.84 | 2 | 1434 |
| TET2   | 4  | Frameshift | INS | T                    | TG   | c.5539_5540insG                    | W1847fs*      | 500  | 15.8  | 2 | 1034 |
| TET2   | 4  | Frameshift | INS | A                    | AAAG | c.3997_3998insAAG                  | I333_1333M>KV | 1392 | 10.27 | 2 | 996  |
| TET2   | 4  | Frameshift | INS | T                    | TG   | c.2917_2918insG                    | C973fs*       | 669  | 8.97  | 2 | 1381 |
| TET2   | 4  | Nonsense   | SNP | C                    | T    | c.1576C>T                          | Q526*         | 1937 | 8.83  | 2 | 599  |
| TET2   | 4  | Nonsense   | SNP | C                    | T    | c.4333C>T                          | Q1445*        | 383  | 8.36  | 2 | 1650 |
| TET2   | 4  | Missense   | SNP | A                    | G    | c.4151A>G                          | D1384G        | 858  | 8.04  | 2 | 69   |
| TET2   | 4  | Frameshift | INS | G                    | GTCC | c.4097_4098insTCC                  | P1366dup      | 428  | 7.94  | 2 | 262  |
| TET2   | 4  | Frameshift | DEL | AT                   | A    | c.3309delT                         | N1103fs*      | 492  | 5.49  | 2 | 168  |
| TET2   | 4  | Nonsense   | SNP | C                    | T    | c.2368C>T                          | Q790*         | 1233 | 5.35  | 2 | 1156 |
| TET2   | 4  | Missense   | DNP | CC                   | AG   | c.3776_3777CC>AG                   | T1259K        | 248  | 4.44  | 2 | 1155 |
| TET2   | 4  | Frameshift | DEL | GA                   | G    | c.2098delA                         | L699fs*       | 716  | 4.05  | 2 | 961  |
| TET2   | 4  | Frameshift | DEL | CT                   | C    | c.1389delT                         | p.N464fs*22   | 406  | 3.69  | 3 | 928  |
| TET2   | 4  | Frameshift | DEL | GCAGAGCTTTCTGGATC    | G    | c.5554_5569delGCAGAGCTTTCTGGATC    | E1851fs*      | 1140 | 3.68  | 2 | 73   |
| TET2   | 4  | Frameshift | INS | G                    | GA   | c.4311_4312insA                    | E1437fs*      | 409  | 3.67  | 2 | 774  |
| TET2   | 4  | Frameshift | INS | T                    | TGC  | c.2733_2734insGC                   | A911fs*       | 1568 | 2.49  | 2 | 1338 |
| TET2   | 4  | Frameshift | DEL | CCCACTCATGAGATGGATGG | C    | c.5174_5192delCCCACTCATGAGATGGATGG | P1725fs*      | 1136 | 2.2   | 2 | 1429 |
| TET2   | 4  | Frameshift | DEL | TG                   | T    | c.1837delG                         | P612fs*       | 2654 | 1.73  | 2 | 641  |
| TET2   | 4  | Nonsense   | SNP | C                    | T    | c.3157C>T                          | p.Q1053*      | 2416 | 1.49  | 3 | 1702 |
| TET2   | 4  | Missense   | SNP | A                    | G    | c.5650A>G                          | p.T1884A      | 775  | 1.42  | 3 | 1738 |
| TP53   | 17 | Missense   | SNP | T                    | C    | c.704A>G                           | N235S         | 598  | 55.69 | 2 | 1319 |
| TP53   | 17 | Missense   | SNP | A                    | T    | c.558T>A                           | D186E         | 688  | 49.85 | 2 | 743  |
| TP53   | 17 | Missense   | SNP | G                    | A    | c.722C>T                           | S241F         | 476  | 46.64 | 2 | 1016 |
| TP53   | 17 | Missense   | SNP | T                    | C    | c.704A>G                           | N235S         | 563  | 44.4  | 2 | 1090 |
| TP53   | 17 | Missense   | SNP | C                    | G    | c.289G>C                           | V97L          | 182  | 41.21 | 2 | 277  |
| TP53   | 17 | Nonsense   | SNP | G                    | A    | c.916C>T                           | R306*         | 379  | 39.84 | 2 | 123  |
| TP53   | 17 | Frameshift | INS | G                    | GCCC | c.847_847insGGG                    | 282_283insG   | 690  | 32.32 | 2 | 1043 |
| TP53   | 17 | Missense   | SNP | T                    | C    | c.578A>G                           | H193R         | 730  | 30.27 | 2 | 1381 |
| TP53   | 17 | Deletion   | DEL | GCAAGTCACAGACTT      | G    | c.358_371delAAGTCTGTGACTTGinsC     | K120fs*       | 201  | 25.87 | 2 | 1725 |
| TP53   | 17 | Nonsense   | SNP | G                    | A    | c.574C>T                           | Q192*         | 878  | 15.03 | 2 | 123  |
| TP53   | 17 | Nonsense   | SNP | G                    | A    | c.586C>T                           | R196*         | 840  | 14.52 | 2 | 527  |
| TP53   | 17 | Missense   | SNP | G                    | A    | c.844C>T                           | R282W         | 365  | 12.05 | 2 | 1542 |
| TP53   | 17 | Missense   | SNP | A                    | G    | c.584T>C                           | I195T         | 878  | 11.05 | 2 | 1306 |
| TP53   | 17 | Missense   | SNP | T                    | C    | c.701A>G                           | Y234C         | 666  | 10.51 | 2 | 414  |
| TP53   | 17 | Missense   | SNP | G                    | A    | c.844C>T                           | R282W         | 357  | 9.24  | 2 | 1478 |
| TP53   | 17 | Missense   | SNP | T                    | C    | c.488A>G                           | Y163C         | 118  | 8.47  | 2 | 517  |
| TP53   | 17 | Missense   | SNP | T                    | C    | c.701A>G                           | Y234C         | 791  | 8.47  | 2 | 1070 |
| TP53   | 17 | Missense   | SNP | T                    | C    | c.716A>G                           | N239S         | 408  | 6.62  | 2 | 399  |
| TP53   | 17 | Frameshift | DEL | CA                   | C    | c.256delT                          | P85fs*        | 213  | 5.63  | 2 | 760  |
| TP53   | 17 | Missense   | SNP | G                    | T    | c.843C>A                           | D281E         | 431  | 5.1   | 2 | 845  |
| TP53   | 17 | Missense   | SNP | G                    | C    | c.833C>G                           | P278R         | 509  | 4.91  | 2 | 1042 |
| TP53   | 17 | Missense   | SNP | T                    | C    | c.578A>G                           | H193R         | 625  | 4.8   | 2 | 1557 |
| TP53   | 17 | Missense   | SNP | T                    | C    | c.745A>G                           | R249G         | 568  | 3.17  | 2 | 1359 |
| TP53   | 17 | Missense   | SNP | A                    | C    | c.809T>G                           | F270C         | 400  | 3     | 2 | 1350 |
| TP53   | 17 | Missense   | SNP | C                    | T    | c.743G>A                           | R248Q         | 558  | 2.87  | 2 | 927  |
| TP53   | 17 | Missense   | SNP | G                    | A    | c.817C>T                           | R273C         | 500  | 2.8   | 2 | 1197 |
| TP53   | 17 | Frameshift | INS | C                    | CG   | c.455dupC                          | p.P153Afs*28  | 941  | 2.02  | 3 | 928  |
| TP53   | 17 | Missense   | SNP | C                    | T    | c.646G>A                           | p.V216M       | 739  | 1.49  | 3 | 928  |
| TP53   | 17 | Missense   | SNP | C                    | T    | c.743G>A                           | p.R248Q       | 573  | 1.05  | 3 | 1588 |
| U2A F1 | 21 | Missense   | SNP | G                    | A    | c.101C>T                           | S34F          | 435  | 39.31 | 2 | 338  |
| U2A F1 | 21 | Missense   | SNP | G                    | A    | c.101C>T                           | p.S34F        | 430  | 25.81 | 3 | 1787 |
| U2A F1 | 21 | Missense   | SNP | T                    | G    | c.470A>C                           | Q157P         | 988  | 4.05  | 2 | 1650 |
| U2A F1 | 21 | Missense   | SNP | T                    | C    | c.470T>C                           | Q157R         | 1144 | 3.85  | 2 | 1229 |
| ZRS R2 | X  | Frameshift | DEL | GCA                  | G    | c.1252_1253delCA                   | R417fs*       | 124  | 11.29 | 2 | 1435 |

**Table S3. Patient characteristics of symptomatic Waldenström Macroglobulinemia cohort.**

|                                         | Total<br>n = 440 (%) | CH                 |                    | p-value             |
|-----------------------------------------|----------------------|--------------------|--------------------|---------------------|
|                                         |                      | Yes<br>n = 61 (14) | No<br>n = 379 (86) |                     |
| <b>Age at diagnosis</b>                 |                      |                    |                    |                     |
| Median (range)                          | 61 (22 - 90)         | 64 (39 - 84)       | 61 (22 - 90)       | 0.04 <sup>†</sup>   |
| <i>Age groups</i>                       |                      |                    |                    |                     |
| 20-29                                   | 1 (0)                | 0 (0)              | 1 (0)              | 0.03 <sup>^</sup>   |
| 30-39                                   | 10 (2)               | 2 (3)              | 8 (2)              |                     |
| 40-49                                   | 55 (12)              | 3 (5)              | 52 (14)            |                     |
| 50-59                                   | 126 (29)             | 14 (23)            | 112 (30)           |                     |
| 60-69                                   | 166 (38)             | 26 (43)            | 140 (37)           |                     |
| 70-79                                   | 82 (19)              | 16 (26)            | 66 (17)            |                     |
| <b>Age at NGS</b>                       |                      |                    |                    |                     |
| Median (range)                          | 68 (33 - 93)         | 72 (44 - 85)       | 67 (33 - 93)       | <0.001 <sup>†</sup> |
| <b>Sex</b>                              |                      |                    |                    |                     |
| Female                                  | 161 (37)             | 25 (41)            | 136 (36)           | 0.48 <sup>‡</sup>   |
| Male                                    | 279 (63)             | 36 (59)            | 243 (64)           |                     |
| <b>Ashkenazi</b>                        |                      |                    |                    |                     |
| Yes                                     | 26 (6)               | 3 (5)              | 23 (6)             | >0.99 <sup>‡</sup>  |
| No                                      | 414 (94)             | 58 (95)            | 356 (94)           |                     |
| <b>Amyloidosis</b>                      |                      |                    |                    |                     |
| Yes                                     | 19 (4)               | 7 (11)             | 12 (3)             | 0.009 <sup>‡</sup>  |
| No                                      | 421 (96)             | 54 (89)            | 367 (97)           |                     |
| <b>DVT, PE, Stroke, or Clot vs none</b> |                      |                    |                    |                     |
| Yes                                     | 42 (10)              | 12 (20)            | 30 (8)             | 0.008 <sup>‡</sup>  |
| None                                    | 398 (90)             | 49 (80)            | 349 (92)           |                     |
| <b>CAD, MI</b>                          |                      |                    |                    |                     |
| Yes                                     | 43 (10)              | 6 (10)             | 37 (10)            | >0.99 <sup>‡</sup>  |
| No                                      | 397 (90)             | 55 (90)            | 342 (90)           |                     |
| <b>Smoking</b>                          |                      |                    |                    |                     |
| Yes                                     | 171 (39)             | 28 (46)            | 143 (38)           | 0.26 <sup>‡</sup>   |
| No                                      | 261 (59)             | 32 (52)            | 229 (60)           |                     |
| <i>Missing</i>                          | 8 (2)                | 1 (2)              | 7 (2)              |                     |
| <b>Alcohol</b>                          |                      |                    |                    |                     |
| Yes                                     | 295 (67)             | 41 (67)            | 254 (67)           | >0.99 <sup>‡</sup>  |
| No                                      | 119 (27)             | 17 (28)            | 102 (27)           |                     |
| <i>Missing</i>                          | 26 (6)               | 3 (5)              | 23 (6)             |                     |

|                                     |            |            |           |                   |
|-------------------------------------|------------|------------|-----------|-------------------|
| <b>EMD at diagnosis</b>             |            |            |           |                   |
| Yes                                 | 56 (13)    | 7 (11)     | 49 (13)   | 0.84 <sup>‡</sup> |
| No                                  | 383 (87)   | 54 (89)    | 329 (87)  |                   |
| <i>Missing</i>                      | 1 (0)      | 0 (0)      | 1 (0)     |                   |
| <b>EMD at any point</b>             |            |            |           |                   |
| Yes                                 | 105 (24)   | 19 (31)    | 86 (23)   | 0.19 <sup>‡</sup> |
| No                                  | 334 (76)   | 42 (69)    | 292 (77)  |                   |
| <i>Missing</i>                      | 1 (0)      | 0 (0)      | 1 (0)     |                   |
| <b>Other cancers</b>                |            |            |           |                   |
| Yes                                 | 77 (18)    | 13 (21)    | 64 (17)   | 0.47 <sup>‡</sup> |
| No                                  | 363 (82)   | 48 (79)    | 315 (83)  |                   |
| <b>No. of therapies, any</b>        |            |            |           |                   |
| Median (range)                      | 2 (0 - 10) | 2 (0 - 10) | 1 (0 - 9) | 0.09 <sup>†</sup> |
| <b>No. of therapies, pre-NGS</b>    |            |            |           |                   |
| Median (range)                      | 1 (0 - 10) | 1 (0 - 10) | 1 (0 - 7) | 0.08 <sup>†</sup> |
| <b>Ibrutinib pre-NGS</b>            |            |            |           |                   |
| Yes                                 | 86 (20)    | 14 (23)    | 72 (19)   | 0.49 <sup>‡</sup> |
| No                                  | 354 (80)   | 47 (77)    | 307 (81)  |                   |
| <b>Cytotoxic therapies, any</b>     |            |            |           |                   |
| Yes                                 | 194 (44)   | 32 (52)    | 162 (43)  | 0.17 <sup>‡</sup> |
| No                                  | 246 (56)   | 29 (48)    | 217 (57)  |                   |
| <i>No. of therapies</i>             |            |            |           |                   |
| 0                                   | 246 (56)   | 29 (48)    | 217 (57)  | 0.06 <sup>^</sup> |
| 1                                   | 137 (31)   | 21 (34)    | 116 (31)  |                   |
| 2                                   | 40 (9)     | 6 (10)     | 34 (9)    |                   |
| 3                                   | 12 (3)     | 4 (7)      | 8 (2)     |                   |
| 4                                   | 3 (1)      | 0 (0)      | 3 (1)     |                   |
| 5                                   | 2 (0)      | 1 (2)      | 1 (0)     |                   |
| <b>Cytotoxic therapies, pre-NGS</b> |            |            |           |                   |
| Yes                                 | 141 (32)   | 26 (43)    | 115 (30)  | 0.08 <sup>‡</sup> |
| No                                  | 299 (68)   | 35 (57)    | 264 (70)  |                   |
| <i>No. of therapies</i>             |            |            |           |                   |
| 0                                   | 299 (68)   | 35 (57)    | 264 (70)  | 0.14 <sup>^</sup> |
| 1                                   | 98 (22)    | 18 (30)    | 80 (21)   |                   |
| 2                                   | 31 (7)     | 6 (10)     | 25 (7)    |                   |
| 3                                   | 9 (2)      | 2 (3)      | 7 (2)     |                   |
| 4                                   | 2 (0)      | 0 (0)      | 2 (1)     |                   |
| 5                                   | 1 (0)      | 0 (0)      | 1 (0)     |                   |
| <b>Prior chemotherapy</b>           |            |            |           |                   |

|                                          |              |               |             |        |
|------------------------------------------|--------------|---------------|-------------|--------|
| Yes                                      | 9 (2)        | 1 (2)         | 8 (2)       | >0.99‡ |
| No                                       | 431 (98)     | 60 (98)       | 371 (98)    |        |
| <b>BM involvement at diagnosis (%)</b>   |              |               |             |        |
| Median (range)                           | 55 (4 - 95)  | 40 (5 - 90)   | 60 (4 - 95) | 0.32†  |
| <i>Missing</i>                           | 81 (18)      | 14 (23)       | 67 (18)     |        |
| <b>BM involvement at NGS (%)</b>         |              |               |             |        |
| Median (range)                           | 50 (0 - 95)  | 50 (1 - 95)   | 50 (0 - 95) | 0.47†  |
| <i>Missing</i>                           | 10 (2)       | 3 (5)         | 7 (2)       |        |
| <b>BM involvement at progression (%)</b> |              |               |             |        |
| Median (range)                           | 70 (5 - 100) | 70 (10 - 100) | 60 (5 - 95) | 0.33†  |
| <i>Missing</i>                           | 303 (69)     | 40 (66)       | 263 (69)    |        |
| <b>BM involvement in aspirate (%)</b>    |              |               |             |        |
| Median (range)                           | 3 (1 - 27)   | 3 (1 - 23)    | 3 (1 - 27)  | 0.66†  |
| <i>Missing</i>                           | 235 (53)     | 28 (46)       | 207 (55)    |        |

### Kappa

|                                   |                        |                       |                        |        |
|-----------------------------------|------------------------|-----------------------|------------------------|--------|
| <b>Kappa (Yes, No)</b>            |                        |                       |                        |        |
| No                                | 93 (21)                | 13 (21)               | 80 (21)                | >0.99‡ |
| Yes                               | 347 (79)               | 48 (79)               | 299 (79)               |        |
| <b>Kappa level at diagnosis</b>   |                        |                       |                        |        |
| Median (range)                    | 39.50 (5.80 - 5000.00) | 23.10 (20.70 - 46.00) | 40.75 (5.80 - 5000.00) | 0.88†  |
| <i>Missing</i>                    | 421 (96)               | 58 (95)               | 363 (96)               |        |
| <b>Kappa level at NGS</b>         |                        |                       |                        |        |
| Median (range)                    | 40.10 (5.10 - 1805.00) | 37.60 (9.90 - 140.90) | 40.10 (5.10 - 1805.00) | 0.95†  |
| <i>Missing</i>                    | 339 (77)               | 47 (77)               | 292 (77)               |        |
| <b>Kappa level at Tx Baseline</b> |                        |                       |                        |        |
| Median (range)                    | 43.30 (1.11 - 4110.00) | 25.30 (1.20 - 742.10) | 46.75 (1.11 - 4110.00) | 0.16†  |
| <i>Missing</i>                    | 305 (69)               | 40 (66)               | 265 (70)               |        |
| <b>Kappa level at Tx Latest</b>   |                        |                       |                        |        |
| Median (range)                    | 25.80 (1.60 - 6790.00) | 20.20 (1.60 - 215.60) | 27.40 (3.14 - 6790.00) | 0.44†  |
| <i>Missing</i>                    | 333 (76)               | 45 (74)               | 288 (76)               |        |

### Lambda

|                                  |                       |                       |                      |        |
|----------------------------------|-----------------------|-----------------------|----------------------|--------|
| <b>Lambda (Yes, No)</b>          |                       |                       |                      |        |
| No                               | 334 (76)              | 46 (75)               | 288 (76)             | >0.99‡ |
| Yes                              | 106 (24)              | 15 (25)               | 91 (24)              |        |
| <b>Lambda level at diagnosis</b> |                       |                       |                      |        |
| Median (range)                   | 10.50 (1.20 - 70.20)  | 10.30 (9.40 - 11.30)  | 10.70 (1.20 - 70.20) | 0.91†  |
| <i>Missing</i>                   | 422 (96)              | 58 (95)               | 364 (96)             |        |
| <b>Lambda level at NGS</b>       |                       |                       |                      |        |
| Median (range)                   | 10.10 (0.53 - 610.20) | 12.35 (5.60 - 132.30) | 9.90 (0.53 - 610.20) | 0.18†  |
| <i>Missing</i>                   | 339 (77)              | 47 (77)               | 292 (77)             |        |



|                                    |                          |                         |                          |                     |
|------------------------------------|--------------------------|-------------------------|--------------------------|---------------------|
| <b>Lambda level at Tx Baseline</b> |                          |                         |                          |                     |
| Median (range)                     | 10.90 (0.59 - 2817.40)   | 11.30 (1.20 - 228.70)   | 10.90 (0.59 - 2817.40)   | 0.52 <sup>†</sup>   |
| Missing                            | 304 (69)                 | 40 (66)                 | 264 (70)                 |                     |
| <b>Lambda level at Tx Latest</b>   |                          |                         |                          |                     |
| Median (range)                     | 8.800 (0.560 - 1319.600) | 7.800 (0.573 - 131.200) | 9.300 (0.560 - 1319.600) | 0.74 <sup>†</sup>   |
| Missing                            | 333 (76)                 | 45 (74)                 | 288 (76)                 |                     |
| <b>IgG</b>                         |                          |                         |                          |                     |
| <b>IgG at Dx</b>                   |                          |                         |                          |                     |
| Median (range)                     | 710 (203 - 1620)         | 646 (216 - 1070)        | 739 (203 - 1620)         | 0.32 <sup>†</sup>   |
| Missing                            | 400 (91)                 | 54 (89)                 | 346 (91)                 |                     |
| <b>IgG at NGS</b>                  |                          |                         |                          |                     |
| Median (range)                     | 509 (49 - 5093)          | 582 (179 - 1360)        | 490 (49 - 5093)          | 0.92 <sup>†</sup>   |
| Missing                            | 323 (73)                 | 45 (74)                 | 278 (73)                 |                     |
| <b>IgG at Tx Baseline</b>          |                          |                         |                          |                     |
| Median (range)                     | 466 (51 - 4934)          | 376 (57 - 1592)         | 480 (51 - 4934)          | 0.04 <sup>†</sup>   |
| Missing                            | 128 (29)                 | 17 (28)                 | 111 (29)                 |                     |
| <b>IgG at Tx Latest</b>            |                          |                         |                          |                     |
| Median (range)                     | 440 (55 - 2928)          | 372 (55 - 1263)         | 442 (56 - 2928)          | 0.18 <sup>†</sup>   |
| Missing                            | 89 (20)                  | 11 (18)                 | 78 (21)                  |                     |
| <b>IgA</b>                         |                          |                         |                          |                     |
| <b>IgA at Dx</b>                   |                          |                         |                          |                     |
| Median (range)                     | 63 (7 - 245)             | 65 (15 - 187)           | 62 (7 - 245)             | 0.57 <sup>†</sup>   |
| Missing                            | 400 (91)                 | 54 (89)                 | 346 (91)                 |                     |
| <b>IgA at NGS</b>                  |                          |                         |                          |                     |
| Median (range)                     | 51 (5 - 382)             | 37 (5 - 238)            | 54 (5 - 382)             | 0.89 <sup>†</sup>   |
| Missing                            | 323 (73)                 | 45 (74)                 | 278 (73)                 |                     |
| <b>IgA at Tx Baseline</b>          |                          |                         |                          |                     |
| Median (range)                     | 32.5 (5.0 - 576.0)       | 29.5 (5.0 - 261.0)      | 33.0 (5.0 - 576.0)       | 0.53 <sup>†</sup>   |
| Missing                            | 128 (29)                 | 17 (28)                 | 111 (29)                 |                     |
| <b>IgA at Tx Latest</b>            |                          |                         |                          |                     |
| Median (range)                     | 42 (5 - 496)             | 34 (5 - 231)            | 44 (5 - 496)             | 0.25 <sup>†</sup>   |
| Missing                            | 90 (20)                  | 11 (18)                 | 79 (21)                  |                     |
| <b>IgM</b>                         |                          |                         |                          |                     |
| <b>IgM at Dx</b>                   |                          |                         |                          |                     |
| Median (range)                     | 2447 (437 - 9078)        | 2304 (474 - 6400)       | 2910 (437 - 9078)        | 0.44 <sup>†</sup>   |
| Missing                            | 394 (90)                 | 52 (85)                 | 342 (90)                 |                     |
| <b>IgM at NGS</b>                  |                          |                         |                          |                     |
| Median (range)                     | 1706 (15 - 8310)         | 2131 (57 - 7700)        | 1690 (15 - 8310)         | > 0.99 <sup>†</sup> |
| Missing                            | 321 (73)                 | 44 (72)                 | 277 (73)                 |                     |

**IgM at Tx Baseline**

|                |                   |                   |                   |                   |
|----------------|-------------------|-------------------|-------------------|-------------------|
| Median (range) | 2799 (25 - 10300) | 2334 (100 - 8480) | 2962 (25 - 10300) | 0.28 <sup>†</sup> |
| <i>Missing</i> | <i>101 (23)</i>   | <i>16 (26)</i>    | <i>85 (22)</i>    |                   |

**IgM at Tx Latest**

|                |                 |                 |                 |                   |
|----------------|-----------------|-----------------|-----------------|-------------------|
| Median (range) | 854 (15 - 8236) | 816 (23 - 5932) | 858 (15 - 8236) | 0.70 <sup>†</sup> |
| <i>Missing</i> | <i>72 (16)</i>  | <i>10 (16)</i>  | <i>62 (16)</i>  |                   |

---

<sup>†</sup>Wilcoxon rank-sum test, <sup>^</sup>Cochran-Armitage test, <sup>‡</sup>Fisher's exact test

**Table S4. Hematologic and immunologic parameters of symptomatic Waldenström Macroglobulinemia patients at time of NGS assay.**

|                        | Total<br>n = 440 (%) | CH                  |                     | <i>p-value</i>      |
|------------------------|----------------------|---------------------|---------------------|---------------------|
|                        |                      | Yes<br>n = 61 (14)  | No<br>n = 379 (86)  |                     |
| <b>Absolute bands</b>  |                      |                     |                     |                     |
| Median (range)         | 0.07 (0.00 - 0.98)   | 0.08 (0.03 - 0.33)  | 0.07 (0.00 - 0.98)  | 0.96 <sup>†</sup>   |
| <i>Missing</i>         | 414 (94)             | 53 (87)             | 361 (95)            |                     |
| <b>Absolute basos</b>  |                      |                     |                     |                     |
| Median (range)         | 0.04 (0.00 - 0.66)   | 0.04 (0.00 - 0.66)  | 0.04 (0.00 - 0.19)  | 0.83 <sup>†</sup>   |
| <i>Missing</i>         | 86 (20)              | 12 (20)             | 74 (20)             |                     |
| <b>Absolute blasts</b> |                      |                     |                     |                     |
| Median (range)         | 0 (0 - 0)            | 0 (0 - 0)           | 0 (0 - 0)           | -                   |
| <i>Missing</i>         | 375 (85)             | 46 (75)             | 329 (87)            |                     |
| <b>Absolute EOS</b>    |                      |                     |                     |                     |
| Median (range)         | 0.09 (0.00 - 1.33)   | 0.08 (0.00 - 1.31)  | 0.09 (0.00 - 1.33)  | > 0.99 <sup>†</sup> |
| <i>Missing</i>         | 83 (19)              | 14 (23)             | 69 (18)             |                     |
| <b>Absolute lymphs</b> |                      |                     |                     |                     |
| Median (range)         | 1.27 (0.02 - 85.00)  | 1.02 (0.14 - 4.39)  | 1.32 (0.02 - 85.00) | 0.03 <sup>†</sup>   |
| <i>Missing</i>         | 87 (20)              | 15 (25)             | 72 (19)             |                     |
| <b>Absolute metas</b>  |                      |                     |                     |                     |
| Median (range)         | 0.15 (0.02 - 1.31)   | 0.08 (0.02 - 1.31)  | 0.16 (0.05 - 0.71)  | 0.58 <sup>†</sup>   |
| <i>Missing</i>         | 428 (97)             | 58 (95)             | 370 (98)            |                     |
| <b>Absolute monos</b>  |                      |                     |                     |                     |
| Median (range)         | 0.62 (0.03 - 3.91)   | 0.62 (0.22 - 1.73)  | 0.62 (0.03 - 3.91)  | 0.97 <sup>†</sup>   |
| <i>Missing</i>         | 87 (20)              | 16 (26)             | 71 (19)             |                     |
| <b>Absolute myelos</b> |                      |                     |                     |                     |
| Median (range)         | 0.05 (0.04 - 0.12)   | -                   | 0.05 (0.04 - 0.12)  | -                   |
| <i>Missing</i>         | 437 (99)             | 61 (100)            | 376 (99)            |                     |
| <b>Absolute neuts</b>  |                      |                     |                     |                     |
| Median (range)         | 3.59 (0.50 - 31.60)  | 3.64 (1.06 - 14.99) | 3.57 (0.50 - 31.60) | > 0.99 <sup>†</sup> |
| <i>Missing</i>         | 85 (19)              | 15 (25)             | 70 (18)             |                     |
| <b>Absolute NRBC</b>   |                      |                     |                     |                     |
| Median (range)         | 0 (0 - 0)            | -                   | 0 (0 - 0)           | -                   |
| <i>Missing</i>         | 437 (99)             | 61 (100)            | 376 (99)            |                     |

**Absolute plasma cells**

|                |                     |                 |                     |   |
|----------------|---------------------|-----------------|---------------------|---|
| Median (range) | 1.24 (0.04 - 14.22) | -               | 1.24 (0.04 - 14.22) | - |
| <i>Missing</i> | <i>436 (99)</i>     | <i>61 (100)</i> | <i>375 (99)</i>     |   |

**Absolute reactive lymphs**

|                |                    |                 |                    |   |
|----------------|--------------------|-----------------|--------------------|---|
| Median (range) | 0.03 (0.01 - 0.04) | -               | 0.03 (0.01 - 0.04) | - |
| <i>Missing</i> | <i>438 (100)</i>   | <i>61 (100)</i> | <i>377 (99)</i>    |   |

**Bands**

|                |                 |                 |                 |                   |
|----------------|-----------------|-----------------|-----------------|-------------------|
| Median (range) | 1.0 (0.0 - 9.0) | 1.5 (1.0 - 5.0) | 1.0 (0.0 - 9.0) | 0.26 <sup>†</sup> |
| <i>Missing</i> | <i>414 (94)</i> | <i>53 (87)</i>  | <i>361 (95)</i> |                   |

**Basos**

|                |                 |                 |                 |                   |
|----------------|-----------------|-----------------|-----------------|-------------------|
| Median (range) | 0.7 (0.0 - 3.1) | 0.8 (0.0 - 3.1) | 0.7 (0.0 - 2.6) | 0.98 <sup>†</sup> |
| <i>Missing</i> | <i>90 (20)</i>  | <i>17 (28)</i>  | <i>73 (19)</i>  |                   |

**Beta2**

|                |                  |                  |                  |                    |
|----------------|------------------|------------------|------------------|--------------------|
| Median (range) | 3.3 (1.4 - 30.5) | 4.0 (2.0 - 30.5) | 3.2 (1.4 - 22.5) | 0.004 <sup>†</sup> |
| <i>Missing</i> | <i>191 (43)</i>  | <i>29 (48)</i>   | <i>162 (43)</i>  |                    |

**Blasts**

|                |                 |                |                 |                     |
|----------------|-----------------|----------------|-----------------|---------------------|
| Median (range) | 0 (0 - 0)       | 0 (0 - 0)      | 0 (0 - 0)       | > 0.99 <sup>†</sup> |
| <i>Missing</i> | <i>375 (85)</i> | <i>46 (75)</i> | <i>329 (87)</i> |                     |

**CRP**

|                |                 |                 |                 |   |
|----------------|-----------------|-----------------|-----------------|---|
| Median (range) | 4.3 (0.6 - 6.3) | -               | 4.3 (0.6 - 6.3) | - |
| <i>Missing</i> | <i>437 (99)</i> | <i>61 (100)</i> | <i>376 (99)</i> |   |

**EOS**

|                |                  |                 |                  |                   |
|----------------|------------------|-----------------|------------------|-------------------|
| Median (range) | 1.6 (0.0 - 21.0) | 1.6 (0.0 - 7.5) | 1.6 (0.0 - 21.0) | 0.78 <sup>†</sup> |
| <i>Missing</i> | <i>93 (21)</i>   | <i>19 (31)</i>  | <i>74 (20)</i>   |                   |

**HCT**

|                |                    |                    |                    |                   |
|----------------|--------------------|--------------------|--------------------|-------------------|
| Median (range) | 34.5 (19.1 - 49.3) | 33.8 (24.6 - 45.6) | 34.8 (19.1 - 49.3) | 0.73 <sup>†</sup> |
| <i>Missing</i> | <i>36 (8)</i>      | <i>5 (8)</i>       | <i>31 (8)</i>      |                   |

**HGB**

|                |                   |                   |                   |                   |
|----------------|-------------------|-------------------|-------------------|-------------------|
| Median (range) | 11.6 (6.2 - 17.1) | 11.2 (7.7 - 15.8) | 11.6 (6.2 - 17.1) | 0.71 <sup>†</sup> |
| <i>Missing</i> | <i>37 (8)</i>     | <i>5 (8)</i>      | <i>32 (8)</i>     |                   |

**LDH**

|                |                 |                |                 |                   |
|----------------|-----------------|----------------|-----------------|-------------------|
| Median (range) | 152 (73 - 408)  | 150 (73 - 324) | 153 (74 - 408)  | 0.72 <sup>†</sup> |
| <i>Missing</i> | <i>325 (74)</i> | <i>37 (61)</i> | <i>288 (76)</i> |                   |

**Lymphs**

|                |                   |                   |                   |                   |
|----------------|-------------------|-------------------|-------------------|-------------------|
| Median (range) | 22.8 (0.6 - 70.0) | 22.7 (3.4 - 49.5) | 22.8 (0.6 - 70.0) | 0.45 <sup>†</sup> |
|----------------|-------------------|-------------------|-------------------|-------------------|

|                     |                     |                     |                     |                   |
|---------------------|---------------------|---------------------|---------------------|-------------------|
| <i>Missing</i>      | 90 (20)             | 17 (28)             | 73 (19)             |                   |
| <b>MCH</b>          |                     |                     |                     |                   |
| Median (range)      | 30.7 (18.7 - 44.7)  | 31.1 (18.7 - 38.9)  | 30.6 (19.2 - 44.7)  | 0.57 <sup>†</sup> |
| <i>Missing</i>      | 37 (8)              | 4 (7)               | 33 (9)              |                   |
| <b>MCHC</b>         |                     |                     |                     |                   |
| Median (range)      | 33.5 (29.2 - 47.7)  | 33.6 (30.2 - 36.0)  | 33.5 (29.2 - 47.7)  | 0.80 <sup>†</sup> |
| <i>Missing</i>      | 37 (8)              | 4 (7)               | 33 (9)              |                   |
| <b>MCV</b>          |                     |                     |                     |                   |
| Median (range)      | 91.1 (61.9 - 112.5) | 91.6 (61.9 - 108.1) | 91.0 (62.1 - 112.5) | 0.72 <sup>†</sup> |
| <i>Missing</i>      | 37 (8)              | 4 (7)               | 33 (9)              |                   |
| <b>Metas</b>        |                     |                     |                     |                   |
| Median (range)      | 2 (1 - 4)           | 1 (1 - 4)           | 2 (1 - 3)           | 0.70 <sup>†</sup> |
| <i>Missing</i>      | 428 (97)            | 58 (95)             | 370 (98)            |                   |
| <b>Monos</b>        |                     |                     |                     |                   |
| Median (range)      | 10.3 (1.1 - 39.0)   | 11.6 (1.4 - 39.0)   | 10.0 (1.1 - 34.6)   | 0.15 <sup>†</sup> |
| <i>Missing</i>      | 88 (20)             | 16 (26)             | 72 (19)             |                   |
| <b>MPV</b>          |                     |                     |                     |                   |
| Median (range)      | 7.8 (5.8 - 13.1)    | 7.8 (6.1 - 10.5)    | 7.7 (5.8 - 13.1)    | 0.64 <sup>†</sup> |
| <i>Missing</i>      | 52 (12)             | 8 (13)              | 44 (12)             |                   |
| <b>Myelos</b>       |                     |                     |                     |                   |
| Median (range)      | 1 (1 - 1)           | -                   | 1 (1 - 1)           | -                 |
| <i>Missing</i>      | 437 (99)            | 61 (100)            | 376 (99)            |                   |
| <b>Neuts</b>        |                     |                     |                     |                   |
| Median (range)      | 63.0 (23.0 - 94.7)  | 64.2 (30.0 - 94.7)  | 62.9 (23.0 - 94.2)  | 0.71 <sup>†</sup> |
| <i>Missing</i>      | 71 (16)             | 11 (18)             | 60 (16)             |                   |
| <b>NRBC</b>         |                     |                     |                     |                   |
| Median (range)      | 0 (0 - 1)           | 0 (0 - 1)           | 0 (0 - 1)           | 0.66 <sup>†</sup> |
| <i>Missing</i>      | 94 (21)             | 15 (25)             | 79 (21)             |                   |
| <b>Plasma cells</b> |                     |                     |                     |                   |
| Median (range)      | 10 (1 - 60)         | -                   | 10 (1 - 60)         | -                 |
| <i>Missing</i>      | 436 (99)            | 61 (100)            | 375 (99)            |                   |
| <b>PLT</b>          |                     |                     |                     |                   |
| Median (range)      | 218 (23 - 692)      | 226 (35 - 692)      | 216 (23 - 630)      | 0.23 <sup>†</sup> |
| <i>Missing</i>      | 75 (17)             | 14 (23)             | 61 (16)             |                   |
| <b>RBC</b>          |                     |                     |                     |                   |

|                        |                     |                     |                     |                   |
|------------------------|---------------------|---------------------|---------------------|-------------------|
| Median<br>(range)      | 3.81 (1.87 - 7.23)  | 3.66 (2.62 - 7.23)  | 3.84 (1.87 - 5.52)  | 0.38 <sup>†</sup> |
| <i>Missing</i>         | 41 (9)              | 5 (8)               | 36 (9)              |                   |
| <b>RDW</b>             |                     |                     |                     |                   |
| Median<br>(range)      | 14.3 (12.0 - 25.4)  | 15.1 (12.7 - 21.7)  | 14.2 (12.0 - 25.4)  | 0.08 <sup>†</sup> |
| <i>Missing</i>         | 36 (8)              | 4 (7)               | 32 (8)              |                   |
| <b>Reactive lymphs</b> |                     |                     |                     |                   |
| Median<br>(range)      | 1 (1 - 1)           | -                   | 1 (1 - 1)           | -                 |
| <i>Missing</i>         | 438 (100)           | 61 (100)            | 377 (99)            |                   |
| <b>WBC</b>             |                     |                     |                     |                   |
| Median<br>(range)      | 5.99 (0.72 - 97.71) | 5.85 (1.56 - 32.79) | 6.00 (0.72 - 97.71) | 0.55 <sup>†</sup> |
| <i>Missing</i>         | 41 (9)              | 6 (10)              | 35 (9)              |                   |

---

<sup>†</sup>Wilcoxon rank-sum test

**Table S5. Patient characteristics of 26 Waldenström Macroglobulinemia patients with TP53 mutation.**

|                                         | Total<br>n = 26 (%) | CH                |                   | p-value |
|-----------------------------------------|---------------------|-------------------|-------------------|---------|
|                                         |                     | Yes<br>n = 6 (23) | No<br>n = 20 (77) |         |
| <b>Age at diagnosis</b>                 |                     |                   |                   |         |
| Median (range)                          | 63 (33 - 88)        | 64 (55 - 88)      | 63 (33 - 75)      | 0.63†   |
| 20-29                                   | -                   | 0 (0)             | 0 (0)             | 0.42^   |
| 30-39                                   | 2 (8)               | 0 (0)             | 2 (10)            |         |
| 40-49                                   | -                   | 0 (0)             | 0 (0)             |         |
| <b>50-59</b>                            | 8 (31)              | 2 (33)            | 6 (30)            |         |
| 60-69                                   | 10 (38)             | 2 (33)            | 8 (40)            |         |
| 70-79                                   | 6 (23)              | 2 (33)            | 4 (20)            |         |
| <b>Age at NGS</b>                       |                     |                   |                   |         |
| Median (range)                          | 72 (37 - 88)        | 77 (75 - 88)      | 70 (37 - 79)      | 0.002‡  |
| <b>Sex</b>                              |                     |                   |                   |         |
| Female                                  | 10 (38)             | 2 (33)            | 8 (40)            | > 0.99‡ |
| Male                                    | 16 (62)             | 4 (67)            | 12 (60)           |         |
| <b>Ashkenazi</b>                        |                     |                   |                   |         |
| Yes                                     | 3 (12)              | -                 | 3 (15)            | > 0.99‡ |
| No                                      | 23 (88)             | 6 (100)           | 17 (85)           |         |
| <b>Amyloidosis</b>                      |                     |                   |                   |         |
| Yes                                     | -                   | -                 | -                 | > 0.99‡ |
| No                                      | 26 (100)            | 6 (100)           | 20 (100)          |         |
| <b>DVT, PE, Stroke, Clot</b>            |                     |                   |                   |         |
| No                                      | 26 (100)            | 6 (100)           | 20 (100)          | -       |
| <b>DVT, PE, Stroke, or Clot vs none</b> |                     |                   |                   |         |
| Yes                                     | -                   | -                 | -                 | > 0.99‡ |
| No                                      | 26 (100)            | 6 (100)           | 20 (100)          |         |
| <b>Smoking</b>                          |                     |                   |                   |         |
| Yes                                     | 13 (50)             | 3 (50)            | 10 (50)           | > 0.99‡ |
| No                                      | 13 (50)             | 3 (50)            | 10 (50)           |         |
| <b>Alcohol</b>                          |                     |                   |                   |         |
| Yes                                     | 24 (92)             | 4 (67)            | 20 (100)          | 0.046*  |
| No                                      | 2 (8)               | 2 (33)            | -                 |         |
| <b>EMD at diagnosis</b>                 |                     |                   |                   |         |
| Yes                                     | 1 (4)               | -                 | 1 (5)             | > 0.99‡ |
| No                                      | 25 (96)             | 6 (100)           | 19 (95)           |         |

|                                        |              |              |              |         |
|----------------------------------------|--------------|--------------|--------------|---------|
| <b>EMD at any point</b>                |              |              |              |         |
| Yes                                    | 8 (31)       | 2 (33)       | 6 (30)       | > 0.99‡ |
| No                                     | 18 (69)      | 4 (67)       | 14 (70)      |         |
| <b>Other cancers</b>                   |              |              |              |         |
| Yes                                    | 6 (23)       | 1 (17)       | 5 (25)       | > 0.99‡ |
| No                                     | 20 (77)      | 5 (83)       | 15 (75)      |         |
| <b>No. of therapies, any</b>           |              |              |              |         |
| Median (range)                         | 2 (0 - 10)   | 4 (1 - 10)   | 2 (0 - 7)    | 0.035‡  |
| <b>No. of therapies, pre-NGS</b>       |              |              |              |         |
| Median (range)                         | 1 (0 - 10)   | 4 (1 - 10)   | 1 (0 - 6)    | 0.039‡  |
| <b>Ibrutinib pre-NGS</b>               |              |              |              |         |
| Yes                                    | 7 (27)       | 4 (67)       | 3 (15)       | 0.028‡  |
| No                                     | 19 (73)      | 2 (33)       | 17 (85)      |         |
| <b>Cytotoxic therapies, any</b>        |              |              |              |         |
| Yes                                    | 10 (38)      | 5 (83)       | 5 (25)       | 0.018‡  |
| No                                     | 16 (62)      | 1 (17)       | 15 (75)      |         |
| 0                                      | 16 (62)      | 1 (17)       | 15 (75)      | 0.010^  |
| 1                                      | 5 (19)       | 2 (33)       | 3 (15)       |         |
| 2                                      | 3 (12)       | 2 (33)       | 1 (5)        |         |
| 3                                      | 1 (4)        | 0 (0)        | 1 (5)        |         |
| 4                                      | -            | 0 (0)        | 0 (0)        |         |
| 5                                      | 1 (4)        | 1 (17)       | 0 (0)        |         |
| <b>Cytotoxic therapies, pre-NGS</b>    |              |              |              |         |
| Yes                                    | 9 (35)       | 5 (83)       | 4 (20)       | 0.010‡  |
| No                                     | 17 (65)      | 1 (17)       | 16 (80)      |         |
| 0                                      | 17 (65)      | 1 (17)       | 16 (80)      | 0.008^  |
| 1                                      | 4 (15)       | 2 (33)       | 2 (10)       |         |
| 2                                      | 3 (12)       | 2 (33)       | 1 (5)        |         |
| 3                                      | 1 (4)        | 0 (0)        | 1 (5)        |         |
| 4                                      | -            | 0 (0)        | 0 (0)        |         |
| 5                                      | 1 (4)        | 1 (17)       | 0 (0)        |         |
| <b>Prior chemotherapy</b>              |              |              |              |         |
| Yes                                    | 1 (4)        | -            | 1 (5)        | > 0.99‡ |
| No                                     | 25 (96)      | 6 (100)      | 19 (95)      |         |
| <b>BM involvement at diagnosis (%)</b> |              |              |              |         |
| Median (range)                         | 70 (20 - 95) | 40 (20 - 90) | 75 (20 - 95) | 0.28†   |
| Missing                                | 5 (19)       | 1 (17)       | 4 (20)       |         |
| <b>BM involvement at NGS (%)</b>       |              |              |              |         |



|                                          |                |               |                |                     |
|------------------------------------------|----------------|---------------|----------------|---------------------|
| Median<br>(range)                        | 65 (5 - 95)    | 30 (5 - 80)   | 75 (10 - 95)   | 0.032 <sup>†</sup>  |
| <b>BM involvement at progression (%)</b> |                |               |                |                     |
| Median<br>(range)                        | 90 (50 - 95)   | 92 (90 - 95)  | 80 (50 - 95)   | > 0.99 <sup>‡</sup> |
| <i>Missing</i>                           | <i>17 (65)</i> | <i>4 (67)</i> | <i>13 (65)</i> |                     |

†Wilcoxon rank-sum test, ^Cochran-Armitage test, ‡Fisher's exact test

**Table S6. Patient characteristics of asymptomatic Waldenström Macroglobulinemia cohort.**

|                                         | Total<br>n = 147 (%) | CH                 |                    | <i>p-value</i>      |
|-----------------------------------------|----------------------|--------------------|--------------------|---------------------|
|                                         |                      | Yes<br>n = 20 (14) | No<br>n = 127 (86) |                     |
| <b>Age at diagnosis</b>                 |                      |                    |                    |                     |
| Median (range)                          | 63 (39 - 89)         | 66 (39 - 86)       | 63 (39 - 89)       | 0.31 <sup>†</sup>   |
| <i>Age groups</i>                       |                      |                    |                    |                     |
| 30-39                                   | 2 (1)                | 1 (5)              | 1 (1)              | 0.37 <sup>^</sup>   |
| 40-49                                   | 18 (12)              | 1 (5)              | 17 (13)            |                     |
| 50-59                                   | 40 (27)              | 4 (20)             | 36 (28)            |                     |
| 60-69                                   | 48 (33)              | 7 (35)             | 41 (32)            |                     |
| 70-79                                   | 39 (27)              | 7 (35)             | 32 (25)            |                     |
| <b>Age at NGS</b>                       |                      |                    |                    |                     |
| Median (range)                          | 66 (40 - 89)         | 66 (53 - 86)       | 65 (40 - 89)       | 0.23 <sup>†</sup>   |
| <b>Sex</b>                              |                      |                    |                    |                     |
| Female                                  | 69 (47)              | 7 (35)             | 62 (49)            | 0.34 <sup>‡</sup>   |
| Male                                    | 78 (53)              | 13 (65)            | 65 (51)            |                     |
| <b>Diagnosis</b>                        |                      |                    |                    |                     |
| MGUS                                    | 31 (21)              | 4 (20)             | 27 (21)            | > 0.99 <sup>‡</sup> |
| Smoldering WM                           | 116 (79)             | 16 (80)            | 100 (79)           |                     |
| <b>Ashkenazi</b>                        |                      |                    |                    |                     |
| Yes                                     | 30 (20)              | 4 (20)             | 26 (20)            | > 0.99 <sup>‡</sup> |
| No                                      | 117 (80)             | 16 (80)            | 101 (80)           |                     |
| <b>Amyloidosis</b>                      |                      |                    |                    |                     |
| Yes                                     | 3 (2)                | 1 (5)              | 2 (2)              | 0.36 <sup>‡</sup>   |
| No                                      | 143 (97)             | 19 (95)            | 124 (98)           |                     |
| <i>Missing</i>                          | 1 (1)                | 0 (0)              | 1 (1)              |                     |
| <b>DVT, PE, Stroke, or Clot vs none</b> |                      |                    |                    |                     |
| Yes                                     | 15 (10)              | 2 (10)             | 13 (10)            | > 0.99 <sup>‡</sup> |
| None                                    | 132 (90)             | 18 (90)            | 114 (90)           |                     |
| <b>CAD, MI</b>                          |                      |                    |                    |                     |
| Yes                                     | 14 (10)              | 2 (10)             | 12 (9)             | > 0.99 <sup>‡</sup> |
| No                                      | 133 (90)             | 18 (90)            | 115 (91)           |                     |
| <b>Smoking</b>                          |                      |                    |                    |                     |
| Yes                                     | 72 (49)              | 11 (55)            | 61 (48)            | 0.63 <sup>‡</sup>   |
| No                                      | 75 (51)              | 9 (45)             | 66 (52)            |                     |
| <b>Alcohol</b>                          |                      |                    |                    |                     |
| Yes                                     | 108 (73)             | 14 (70)            | 94 (74)            | 0.78 <sup>‡</sup>   |

|                                          |                   |                   |                   |                     |
|------------------------------------------|-------------------|-------------------|-------------------|---------------------|
| No                                       | 34 (23)           | 5 (25)            | 29 (23)           |                     |
| <i>Missing</i>                           | <i>5 (3)</i>      | <i>1 (5)</i>      | <i>4 (3)</i>      |                     |
| <b>EMD at diagnosis</b>                  |                   |                   |                   |                     |
| Yes                                      | 12 (8)            | 2 (10)            | 10 (8)            | 0.67 <sup>‡</sup>   |
| No                                       | 135 (92)          | 18 (90)           | 117 (92)          |                     |
| <b>EMD at any point</b>                  |                   |                   |                   |                     |
| Yes                                      | 11 (7)            | 3 (15)            | 8 (6)             | 0.17 <sup>‡</sup>   |
| No                                       | 136 (93)          | 17 (85)           | 119 (94)          |                     |
| <b>Other cancers</b>                     |                   |                   |                   |                     |
| Yes                                      | 31 (21)           | 3 (15)            | 28 (22)           | 0.57 <sup>‡</sup>   |
| No                                       | 116 (79)          | 17 (85)           | 99 (78)           |                     |
| <b>No. of therapies, any</b>             |                   |                   |                   |                     |
| Median (range)                           | 0 (0 - 3)         | 0 (0 - 1)         | 0 (0 - 3)         | 0.69 <sup>†</sup>   |
| <b>No. of therapies, pre-NGS</b>         |                   |                   |                   |                     |
| Median (range)                           | 0 (0 - 1)         | 0 (0 - 0)         | 0 (0 - 1)         | 0.58 <sup>†</sup>   |
| <b>Ibrutinib pre-NGS</b>                 |                   |                   |                   |                     |
| Yes                                      | 0 (0)             | 0 (0)             | 0 (0)             | > 0.99 <sup>‡</sup> |
| No                                       | 147 (100)         | 20 (100)          | 127 (100)         |                     |
| <b>Cytotoxic therapies, any</b>          |                   |                   |                   |                     |
| Yes                                      | 1 (1)             | 1 (5)             | 0 (0)             | 0.14 <sup>‡</sup>   |
| No                                       | 146 (99)          | 19 (95)           | 127 (100)         |                     |
| <b>Cytotoxic therapies, pre-NGS</b>      |                   |                   |                   |                     |
| Yes                                      | 0 (0)             | 0 (0)             | 0 (0)             | > 0.99 <sup>‡</sup> |
| No                                       | 147 (100)         | 20 (100)          | 127 (100)         |                     |
| <b>Prior chemotherapy</b>                |                   |                   |                   |                     |
| Yes                                      | 9 (6)             | 1 (5)             | 8 (6)             | > 0.99 <sup>‡</sup> |
| No                                       | 138 (94)          | 19 (95)           | 119 (94)          |                     |
| <b>BM involvement at diagnosis (%)</b>   |                   |                   |                   |                     |
| Median (range)                           | 20.0 (0.3 - 95.0) | 20.0 (5.0 - 80.0) | 20.0 (0.3 - 95.0) | 0.87 <sup>†</sup>   |
| <i>Missing</i>                           | <i>22 (15)</i>    | <i>3 (15)</i>     | <i>19 (15)</i>    |                     |
| <b>BM involvement at NGS (%)</b>         |                   |                   |                   |                     |
| Median (range)                           | 20 (1 - 95)       | 40 (5 - 95)       | 20 (1 - 95)       | 0.46 <sup>†</sup>   |
| <i>Missing</i>                           | <i>7 (5)</i>      | <i>1 (5)</i>      | <i>6 (5)</i>      |                     |
| <b>BM involvement at progression (%)</b> |                   |                   |                   |                     |
| Median (range)                           | 40 (10 - 95)      | 68 (40 - 95)      | 40 (10 - 80)      | 0.28 <sup>†</sup>   |
| <i>Missing</i>                           | <i>136 (93)</i>   | <i>18 (90)</i>    | <i>118 (93)</i>   |                     |
| <b>BM involvement in aspirate (%)</b>    |                   |                   |                   |                     |
| Median (range)                           | 3 (1 - 20)        | 4 (2 - 13)        | 3 (1 - 20)        | 0.19 <sup>†</sup>   |
| <i>Missing</i>                           | <i>70 (48)</i>    | <i>10 (50)</i>    | <i>60 (47)</i>    |                     |

Kappa

|                                    |                        |                        |                        |                   |
|------------------------------------|------------------------|------------------------|------------------------|-------------------|
| <b>Kappa (Yes, No)</b>             |                        |                        |                        |                   |
| No                                 | 33 (22)                | 7 (35)                 | 26 (20)                | 0.16 <sup>‡</sup> |
| Yes                                | 114 (78)               | 13 (65)                | 101 (80)               |                   |
| <b>Kappa level at diagnosis</b>    |                        |                        |                        |                   |
| Median (range)                     | 22.15 (8.30 - 829.30)  | 18.04 (10.60 - 25.48)  | 22.15 (8.30 - 829.30)  | 0.52 <sup>†</sup> |
| <i>Missing</i>                     | 105 (71)               | 18 (90)                | 87 (69)                |                   |
| <b>Kappa level at NGS</b>          |                        |                        |                        |                   |
| Median (range)                     | 25.45 (3.38 - 2648.30) | 30.85 (6.30 - 2648.30) | 24.95 (3.38 - 407.10)  | 0.31 <sup>†</sup> |
| <i>Missing</i>                     | 55 (37)                | 4 (20)                 | 51 (40)                |                   |
| <b>Kappa level at Tx Baseline</b>  |                        |                        |                        |                   |
| Median (range)                     | 17.10 (6.84 - 2300.00) | -                      | 17.10 (6.84 - 2300.00) | -                 |
| <i>Missing</i>                     | 138 (94)               | 20 (100)               | 118 (93)               |                   |
| <b>Kappa level at Tx Latest</b>    |                        |                        |                        |                   |
| Median (range)                     | 28.7 (6.6 - 2015.2)    | 84.7 (32.8 - 2015.2)   | 25.9 (6.6 - 95.2)      | 0.02 <sup>†</sup> |
| <i>Missing</i>                     | 122 (83)               | 15 (75)                | 107 (84)               |                   |
| <b>Lambda</b>                      |                        |                        |                        |                   |
| <b>Lambda (Yes, No)</b>            |                        |                        |                        |                   |
| No                                 | 110 (75)               | 12 (60)                | 98 (77)                | 0.16 <sup>‡</sup> |
| Yes                                | 37 (25)                | 8 (40)                 | 29 (23)                |                   |
| <b>Lambda level at diagnosis</b>   |                        |                        |                        |                   |
| Median (range)                     | 10.25 (2.60 - 105.90)  | 38.96 (25.63 - 52.30)  | 10.00 (2.60 - 105.90)  | 0.09 <sup>†</sup> |
| <i>Missing</i>                     | 105 (71)               | 18 (90)                | 87 (69)                |                   |
| <b>Lambda level at NGS</b>         |                        |                        |                        |                   |
| Median (range)                     | 12.05 (0.84 - 472.10)  | 13.35 (7.20 - 335.90)  | 11.45 (0.84 - 472.10)  | 0.11 <sup>†</sup> |
| <i>Missing</i>                     | 55 (37)                | 4 (20)                 | 51 (40)                |                   |
| <b>Lambda level at Tx Baseline</b> |                        |                        |                        |                   |
| Median (range)                     | 12.10 (7.15 - 778.00)  | -                      | 12.10 (7.15 - 778.00)  | -                 |
| <i>Missing</i>                     | 138 (94)               | 20 (100)               | 118 (93)               |                   |
| <b>Lambda level at Tx Latest</b>   |                        |                        |                        |                   |
| Median (range)                     | 11.0 (2.5 - 110.5)     | 12.0 (5.4 - 57.2)      | 10.8 (2.5 - 110.5)     | 0.84 <sup>†</sup> |
| <i>Missing</i>                     | 122 (83)               | 15 (75)                | 107 (84)               |                   |
| <b>IgG</b>                         |                        |                        |                        |                   |
| <b>IgG at Dx</b>                   |                        |                        |                        |                   |
| Median (range)                     | 683 (235 - 1979)       | 831 (639 - 1155)       | 672 (235 - 1979)       | 0.29 <sup>†</sup> |
| <i>Missing</i>                     | 96 (65)                | 17 (85)                | 79 (62)                |                   |
| <b>IgG at NGS</b>                  |                        |                        |                        |                   |
| Median (range)                     | 654 (120 - 2670)       | 674 (120 - 1328)       | 644 (184 - 2670)       | 0.57 <sup>†</sup> |
| <i>Missing</i>                     | 41 (28)                | 1 (5)                  | 40 (31)                |                   |
| <b>IgG at Tx Baseline</b>          |                        |                        |                        |                   |
| Median (range)                     | 730 (407 - 1390)       | -                      | 730 (407 - 1390)       | -                 |

|                           |                     |                   |                     |                   |
|---------------------------|---------------------|-------------------|---------------------|-------------------|
| <i>Missing</i>            | 137 (93)            | 20 (100)          | 117 (92)            |                   |
| <b>IgG at Tx Latest</b>   |                     |                   |                     |                   |
| Median (range)            | 662 (117 - 2510)    | 752 (117 - 1367)  | 612 (135 - 2510)    | 0.20 <sup>†</sup> |
| <i>Missing</i>            | 39 (27)             | 6 (30)            | 33 (26)             |                   |
| <b>IgA</b>                |                     |                   |                     |                   |
| <b>IgA at Dx</b>          |                     |                   |                     |                   |
| Median (range)            | 75 (7 - 493)        | 134 (56 - 152)    | 75 (7 - 493)        | 0.41 <sup>†</sup> |
| <i>Missing</i>            | 96 (65)             | 17 (85)           | 79 (62)             |                   |
| <b>IgA at NGS</b>         |                     |                   |                     |                   |
| Median (range)            | 75 (5 - 1404)       | 76 (17 - 351)     | 74 (5 - 1404)       | 0.59 <sup>†</sup> |
| <i>Missing</i>            | 41 (28)             | 1 (5)             | 40 (31)             |                   |
| <b>IgA at Tx Baseline</b> |                     |                   |                     |                   |
| Median (range)            | 98.7 (38.0 - 383.0) | -                 | 98.7 (38.0 - 383.0) | -                 |
| <i>Missing</i>            | 137 (93)            | 20 (100)          | 117 (92)            |                   |
| <b>IgA at Tx Latest</b>   |                     |                   |                     |                   |
| Median (range)            | 68 (5 - 3059)       | 96 (25 - 369)     | 66 (5 - 3059)       | 0.10 <sup>†</sup> |
| <i>Missing</i>            | 39 (27)             | 6 (30)            | 33 (26)             |                   |
| <b>IgM</b>                |                     |                   |                     |                   |
| <b>IgM at Dx</b>          |                     |                   |                     |                   |
| Median (range)            | 1539 (174 - 4947)   | 716 (323 - 2390)  | 1552 (174 - 4947)   | 0.53 <sup>†</sup> |
| <i>Missing</i>            | 90 (61)             | 15 (75)           | 75 (59)             |                   |
| <b>IgM at NGS</b>         |                     |                   |                     |                   |
| Median (range)            | 1228 (134 - 7554)   | 1658 (312 - 4815) | 1191 (134 - 7554)   | 0.31 <sup>†</sup> |
| <i>Missing</i>            | 41 (28)             | 1 (5)             | 40 (31)             |                   |
| <b>IgM at Tx Baseline</b> |                     |                   |                     |                   |
| Median (range)            | 1645 (315 - 4680)   | -                 | 1645 (315 - 4680)   | -                 |
| <i>Missing</i>            | 137 (93)            | 20 (100)          | 117 (92)            |                   |
| <b>IgM at Tx Latest</b>   |                     |                   |                     |                   |
| Median (range)            | 1264 (84 - 6140)    | 1404 (279 - 6130) | 1260 (84 - 6140)    | 0.41 <sup>†</sup> |
| <i>Missing</i>            | 37 (25)             | 5 (25)            | 32 (25)             |                   |

<sup>†</sup>Wilcoxon rank-sum test, <sup>^</sup>Cochran-Armitage test, <sup>‡</sup>Fisher's exact test

**Table S7. Patient characteristics of 15 Waldenström  
Macroglobulinemia patients with secondary MDS, AML or ALL.**

|                                         | Total<br>n = 15 (%) | Somatic mutations  |                 |
|-----------------------------------------|---------------------|--------------------|-----------------|
|                                         |                     | Yes<br>n = 14 (93) | No<br>n = 1 (7) |
| <b>Age at diagnosis</b>                 |                     |                    |                 |
| Median (range)                          | 70 (55 - 88)        | 70 (55 - 88)       | 78 (78 - 78)    |
| <i>Age groups</i>                       |                     |                    |                 |
| 50-59                                   | 2 (13)              | 2 (14)             | 0 (0)           |
| 60-69                                   | 5 (33)              | 5 (36)             | 0 (0)           |
| 70-79                                   | 8 (53)              | 7 (50)             | 1 (100)         |
| <b>Age at NGS</b>                       |                     |                    |                 |
| Median (range)                          | 77 (61 - 88)        | 77 (61 - 88)       | 78 (78 - 78)    |
| <b>Sex</b>                              |                     |                    |                 |
| Female                                  | 2 (13)              | 1 (7)              | 1 (100)         |
| Male                                    | 13 (87)             | 13 (93)            | 0 (0)           |
| <b>Diagnosis</b>                        |                     |                    |                 |
| Smoldering<br>WM                        | 2 (13)              | 2 (14)             | 0 (0)           |
| WM                                      | 13 (87)             | 12 (86)            | 1 (100)         |
| <b>Ashkenazi</b>                        |                     |                    |                 |
| Yes                                     | 0 (0)               | 0 (0)              | 0 (0)           |
| No                                      | 15 (100)            | 14 (100)           | 1 (100)         |
| <b>Amyloidosis</b>                      |                     |                    |                 |
| Yes                                     | 0 (0)               | 0 (0)              | 0 (0)           |
| No                                      | 15 (100)            | 14 (100)           | 1 (100)         |
| <b>DVT, PE, Stroke, or Clot vs none</b> |                     |                    |                 |
| Yes                                     | 0 (0)               | 0 (0)              | 0 (0)           |
| None                                    | 15 (100)            | 14 (100)           | 1 (100)         |
| <b>Smoking</b>                          |                     |                    |                 |
| Yes                                     | 9 (60)              | 9 (64)             | 0 (0)           |
| No                                      | 6 (40)              | 5 (36)             | 1 (100)         |
| <b>Alcohol</b>                          |                     |                    |                 |
| Yes                                     | 11 (73)             | 10 (71)            | 1 (100)         |
| No                                      | 3 (20)              | 3 (21)             | 0 (0)           |
| <i>Missing</i>                          | 1 (7)               | 1 (7)              | 0 (0)           |
| <b>EMD at diagnosis</b>                 |                     |                    |                 |
| Yes                                     | 2 (13)              | 2 (14)             | 0 (0)           |
| No                                      | 13 (87)             | 12 (86)            | 1 (100)         |
| <b>EMD at any point</b>                 |                     |                    |                 |
| Yes                                     | 4 (27)              | 4 (29)             | 0 (0)           |
| No                                      | 11 (73)             | 10 (71)            | 1 (100)         |
| <b>Other cancers</b>                    |                     |                    |                 |
| Yes                                     | 3 (20)              | 3 (21)             | 0 (0)           |
| No                                      | 12 (80)             | 11 (79)            | 1 (100)         |
| <b>No. of therapies, any</b>            |                     |                    |                 |
| Median (range)                          | 1 (0 - 6)           | 1 (0 - 6)          | 1 (1 - 1)       |
| <b>No. of therapies, pre-NGS</b>        |                     |                    |                 |

|                                          |              |              |              |
|------------------------------------------|--------------|--------------|--------------|
| Median (range)                           | 1 (0 - 6)    | 1 (0 - 6)    | 0 (0 - 0)    |
| <b>Ibrutinib pre-NGS</b>                 |              |              |              |
| Yes                                      | 1 (7)        | 1 (7)        | 0 (0)        |
| No                                       | 14 (93)      | 13 (93)      | 1 (100)      |
| <b>Cytotoxic therapies, any</b>          |              |              |              |
| Yes                                      | 6 (40)       | 5 (36)       | 1 (100)      |
| No                                       | 9 (60)       | 9 (64)       | 0 (0)        |
| <i>No. of therapies</i>                  |              |              |              |
| 0                                        | 9 (60)       | 9 (64)       | 0 (0)        |
| 1                                        | 4 (27)       | 3 (21)       | 1 (100)      |
| 2                                        | 1 (7)        | 1 (7)        | 0 (0)        |
| 5                                        | 1 (7)        | 1 (7)        | 0 (0)        |
| <b>Cytotoxic therapies, pre-NGS</b>      |              |              |              |
| Yes                                      | 4 (27)       | 4 (29)       | 0 (0)        |
| No                                       | 11 (73)      | 10 (71)      | 1 (100)      |
| <i>No. of therapies</i>                  |              |              |              |
| 0                                        | 11 (73)      | 10 (71)      | 1 (100)      |
| 1                                        | 2 (13)       | 2 (14)       | 0 (0)        |
| 2                                        | 1 (7)        | 1 (7)        | 0 (0)        |
| 5                                        | 1 (7)        | 1 (7)        | 0 (0)        |
| <b>Prior chemotherapy</b>                |              |              |              |
| Yes                                      | 0 (0)        | 0 (0)        | 0 (0)        |
| No                                       | 15 (100)     | 14 (100)     | 1 (100)      |
| <b>BM involvement at diagnosis (%)</b>   |              |              |              |
| Median (range)                           | 50 (5 - 95)  | 50 (5 - 95)  | 60 (60 - 60) |
| <i>Missing</i>                           | 3 (20)       | 3 (21)       | 0 (0)        |
| <b>BM involvement at time of NGS (%)</b> |              |              |              |
| Median (range)                           | 10 (0 - 90)  | 10 (0 - 90)  | 0 (0)        |
| <i>Missing</i>                           | 1 (7)        | 0 (0)        | 1 (100)      |
| <b>BM involvement at progression (%)</b> |              |              |              |
| Median (range)                           | 30 (15 - 90) | 30 (15 - 90) | 0 (0)        |
| <i>Missing</i>                           | 12 (80)      | 11 (79)      | 1 (100)      |
| <b>BM involvement in aspirate (%)</b>    |              |              |              |
| Median (range)                           | 2 (1 - 6)    | 2 (1 - 6)    | 1 (1 - 1)    |
| <i>Missing</i>                           | 8 (53)       | 8 (57)       | 0 (0)        |

### Kappa

|                                   |                      |                      |                       |
|-----------------------------------|----------------------|----------------------|-----------------------|
| <b>Kappa (Yes, No)</b>            |                      |                      |                       |
| No                                | 1 (7)                | 1 (7)                | 0 (0)                 |
| Yes                               | 14 (93)              | 13 (93)              | 1 (100)               |
| <b>Kappa level at diagnosis</b>   |                      |                      |                       |
| Median (range)                    | 145.3 (45.7 - 245.0) | 145.3 (45.7 - 245.0) | -                     |
| <i>Missing</i>                    | 13 (87)              | 12 (86)              | 1 (100)               |
| <b>Kappa level at time of NGS</b> |                      |                      |                       |
| Median (range)                    | 36.0 (27.7 - 39.3)   | 36.0 (27.7 - 39.3)   | -                     |
| <i>Missing</i>                    | 12 (80)              | 11 (79)              | 1 (100)               |
| <b>Kappa level at Tx Baseline</b> |                      |                      |                       |
| Median (range)                    | 205.8 (21.3 - 390.3) | 21.3 (21.3 - 21.3)   | 390.3 (390.3 - 390.3) |
| <i>Missing</i>                    | 13 (87)              | 13 (93)              | 0 (0)                 |

|                                    |                      |                      |                    |
|------------------------------------|----------------------|----------------------|--------------------|
| <b>Kappa level at Tx Latest</b>    |                      |                      |                    |
| Median (range)                     | 16.9 (16.7 - 17.1)   | 17.1 (17.1 - 17.1)   | 16.7 (16.7 - 16.7) |
| <i>Missing</i>                     | 13 (87)              | 13 (93)              | 0 (0)              |
| <b>Lambda</b>                      |                      |                      |                    |
| <b>Lambda (Yes, No)</b>            |                      |                      |                    |
| No                                 | 12 (80)              | 11 (79)              | 1 (100)            |
| Yes                                | 3 (20)               | 3 (21)               | 0 (0)              |
| <b>Lambda level at diagnosis</b>   |                      |                      |                    |
| Median (range)                     | 120.2 (14.5 - 225.9) | 120.2 (14.5 - 225.9) | -                  |
| <i>Missing</i>                     | 13 (87)              | 12 (86)              | 1 (100)            |
| <b>Lambda level at time of NGS</b> |                      |                      |                    |
| Median (range)                     | 11.8 (8.9 - 14.8)    | 11.8 (8.9 - 14.8)    | -                  |
| <i>Missing</i>                     | 12 (80)              | 11 (79)              | 1 (100)            |
| <b>Lambda level at Tx Baseline</b> |                      |                      |                    |
| Median (range)                     | 12 (9 - 14)          | 14 (14 - 14)         | 9 (9 - 9)          |
| <i>Missing</i>                     | 13 (87)              | 13 (93)              | 0 (0)              |
| <b>Lambda level at Tx Latest</b>   |                      |                      |                    |
| Median (range)                     | 7.5 (4.2 - 10.8)     | 10.8 (10.8 - 10.8)   | 4.2 (4.2 - 4.2)    |
| <i>Missing</i>                     | 13 (87)              | 13 (93)              | 0 (0)              |
| <b>IgG</b>                         |                      |                      |                    |
| <b>IgG at Dx</b>                   |                      |                      |                    |
| Median (range)                     | 949 (720 - 1753)     | 949 (720 - 1753)     | -                  |
| <i>Missing</i>                     | 12 (80)              | 11 (79)              | 1 (100)            |
| <b>IgG at time of NGS</b>          |                      |                      |                    |
| Median (range)                     | 701 (456 - 1040)     | 701 (456 - 1040)     | -                  |
| <i>Missing</i>                     | 12 (80)              | 11 (79)              | 1 (100)            |
| <b>IgG at Tx Baseline</b>          |                      |                      |                    |
| Median (range)                     | 417 (183 - 846)      | 416 (183 - 846)      | 533 (533 - 533)    |
| <i>Missing</i>                     | 8 (53)               | 8 (57)               | 0 (0)              |
| <b>IgG at Tx Latest</b>            |                      |                      |                    |
| Median (range)                     | 516 (111 - 1429)     | 552 (111 - 1429)     | 314 (314 - 314)    |
| <i>Missing</i>                     | 5 (33)               | 5 (36)               | 0 (0)              |
| <b>IgA</b>                         |                      |                      |                    |
| <b>IgA at Dx</b>                   |                      |                      |                    |
| Median (range)                     | 134 (118 - 202)      | 134 (118 - 202)      | -                  |
| <i>Missing</i>                     | 12 (80)              | 11 (79)              | 1 (100)            |
| <b>IgA at time of NGS</b>          |                      |                      |                    |
| Median (range)                     | 77 (73 - 104)        | 77 (73 - 104)        | -                  |
| <i>Missing</i>                     | 12 (80)              | 11 (79)              | 1 (100)            |
| <b>IgA at Tx Baseline</b>          |                      |                      |                    |
| Median (range)                     | 33 (10 - 96)         | 32 (10 - 96)         | 55 (55 - 55)       |
| <i>Missing</i>                     | 8 (53)               | 8 (57)               | 0 (0)              |
| <b>IgA at Tx Latest</b>            |                      |                      |                    |
| Median (range)                     | 45 (5 - 130)         | 50 (5 - 130)         | 40 (40 - 40)       |
| <i>Missing</i>                     | 5 (33)               | 5 (36)               | 0 (0)              |
| <b>IgM</b>                         |                      |                      |                    |
| <b>IgM at Dx</b>                   |                      |                      |                    |
| Median (range)                     | 1280 (1153 - 6230)   | 1280 (1153 - 6230)   | -                  |



|                           |                  |                  |              |
|---------------------------|------------------|------------------|--------------|
| <i>Missing</i>            | 12 (80)          | 11 (79)          | 1 (100)      |
| <b>IgM at time of NGS</b> |                  |                  |              |
| Median (range)            | 587 (446 - 1260) | 587 (446 - 1260) | -            |
| <i>Missing</i>            | 12 (80)          | 11 (79)          | 1 (100)      |
| <b>IgM at Tx Baseline</b> |                  |                  |              |
| Median (range)            | 2060 (50 - 6430) | 2345 (86 - 6430) | 50 (50 - 50) |
| <i>Missing</i>            | 6 (40)           | 6 (43)           | 0 (0)        |
| <b>IgM at Tx Latest</b>   |                  |                  |              |
| Median (range)            | 450 (17 - 3638)  | 576 (37 - 3638)  | 17 (17 - 17) |
| <i>Missing</i>            | 5 (33)           | 5 (36)           | 0 (0)        |

---

**Table S8. Treatments received at any point and pre-NGS.** Treatments given for all patients, for asymptomatic WM patients and symptomatic WM patients.

| Therapy          | All patients |             | Asymptomatic WM |             | Symptomatic WM |             |
|------------------|--------------|-------------|-----------------|-------------|----------------|-------------|
|                  | N = 587 (%)  |             | N = 147 (%)     |             | N = 440 (%)    |             |
|                  | Any          | Pre-NGS     | Any             | Pre-NGS     | Any            | Pre-NGS     |
| None             | 168<br>(29)  | 291<br>(50) | 142<br>(97)     | 145<br>(99) | 26 (6)         | (33)        |
| Other            | 224<br>(38)  | 278<br>(47) | 4 (3)           | 5 (3)       | 220<br>(50)    | 273<br>(62) |
| Bendamustine     | 130<br>(22)  | 72<br>(12)  | 1 (1)           | -           | 129<br>(29)    | 72 (16)     |
| Fludarabine      | 24 (4)       | 22 (4)      | -               | -           | 24 (5)         | 22 (5)      |
| CD-R             | 17 (3)       | 16 (3)      | -               | -           | 17 (4)         | 16 (4)      |
| CHOP             | 17 (3)       | 12 (2)      | -               | -           | 17 (4)         | 12 (3)      |
| CDR              | 16 (3)       | 15 (3)      | -               | -           | 16 (4)         | 15 (3)      |
| R-CHOP           | 14 (2)       | 10 (2)      | -               | -           | 14 (3)         | 10 (2)      |
| Cyclophosphamide | 12 (2)       | 12 (2)      | -               | -           | 12 (3)         | 12 (3)      |
| Chlorambucil     | 11 (2)       | 11 (2)      | -               | -           | 11 (2)         | 11 (2)      |
| R-CP             | 8 (1)        | 8 (1)       | -               | -           | 8 (2)          | 8 (2)       |
| Cytosan          | 8 (1)        | 6 (1)       | -               | -           | 8 (2)          | 6 (1)       |
| CyBorD           | 7 (1)        | 7 (1)       | -               | -           | 7 (2)          | 7 (2)       |
| R-CVP            | 7 (1)        | 7 (1)       | -               | -           | 7 (2)          | 7 (2)       |
| Cladribine       | 6 (1)        | 6 (1)       | -               | -           | 6 (1)          | 6 (1)       |
| RCP              | 6 (1)        | 6 (1)       | -               | -           | 6 (1)          | 6 (1)       |
| RCHOP            | 5 (1)        | 2 (0)       | -               | -           | 5 (1)          | 2 (0)       |
| R-CD             | 3 (1)        | 3 (1)       | -               | -           | 3 (1)          | 3 (1)       |
| CP-R             | 3 (1)        | 3 (1)       | -               | -           | 3 (1)          | 3 (1)       |
| RICE             | 3 (1)        | 1 (0)       | -               | -           | 3 (1)          | 1 (0)       |
| RCD              | 2 (0)        | 2 (0)       | -               | -           | 2 (0)          | 2 (0)       |
| CPR              | 2 (0)        | 2 (0)       | -               | -           | 2 (0)          | 2 (0)       |
| DCR              | 2 (0)        | 2 (0)       | -               | -           | 2 (0)          | 2 (0)       |
| Busulfan         | 1 (0)        | 1 (0)       | -               | -           | 1 (0)          | 1 (0)       |
| CRD              | 1 (0)        | 1 (0)       | -               | -           | 1 (0)          | 1 (0)       |
| BEAM             | 1 (0)        | 1 (0)       | -               | -           | 1 (0)          | 1 (0)       |
| FCR              | 1 (0)        | 1 (0)       | -               | -           | 1 (0)          | 1 (0)       |
| RCOP             | 1 (0)        | 1 (0)       | -               | -           | 1 (0)          | 1 (0)       |
| hyperCVAD        | 1 (0)        | 1 (0)       | -               | -           | 1 (0)          | 1 (0)       |
| EPOCH            | 1 (0)        | 1 (0)       | -               | -           | 1 (0)          | 1 (0)       |
| VR-CAP           | 1 (0)        | -           | -               | -           | 1 (0)          | -           |
| RCAP             | 1 (0)        | 1 (0)       | -               | -           | 1 (0)          | 1 (0)       |

|             |       |       |   |   |       |       |
|-------------|-------|-------|---|---|-------|-------|
| ESHAP       | 1 (0) | 1 (0) | - | - | 1 (0) | 1 (0) |
| Gemcitabine | 1 (0) | -     | - | - | 1 (0) | -     |
| Oxaliplatin | 1 (0) | -     | - | - | 1 (0) | -     |

---

**SUPPLEMENTARY FIGURES**

**Figure S1. Study workflow.**

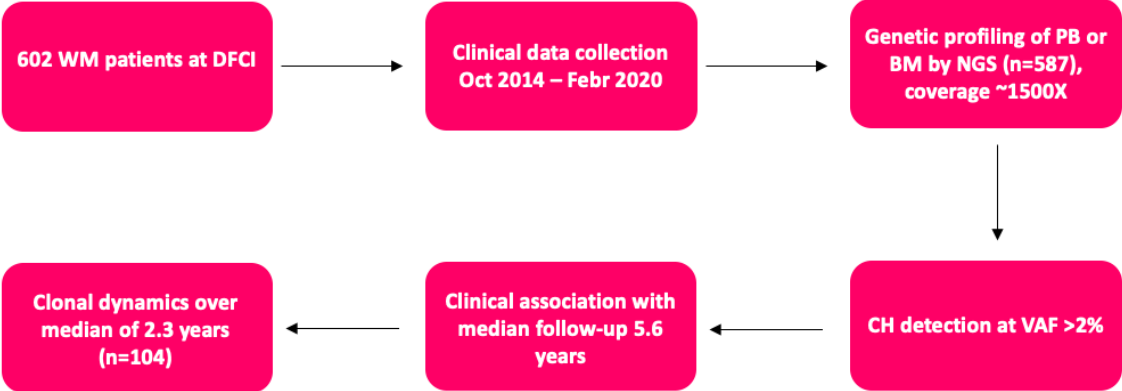

**Figure S2 Mutational properties for all 602 Waldenström Macroglobulinemia patients. (A)** Distribution of the types of single-nucleotide base-pair changes seen in all detected mutations. **(B)** Distribution of VAF among different variants.

**A**

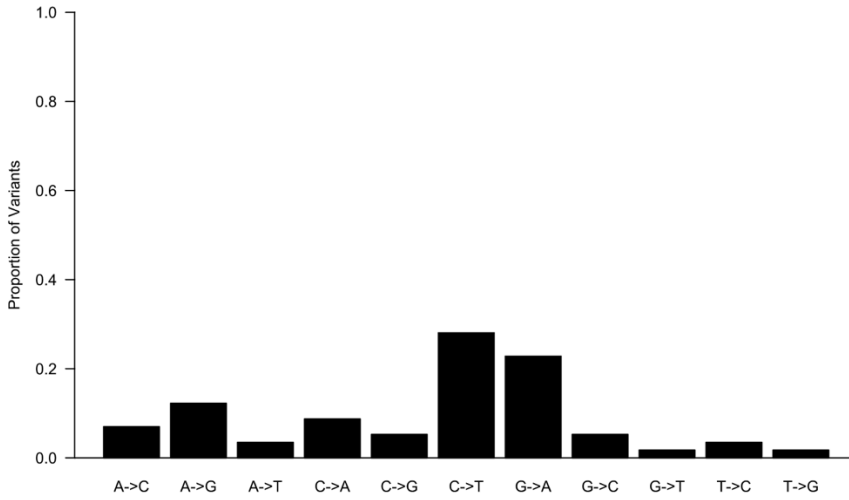

**B**

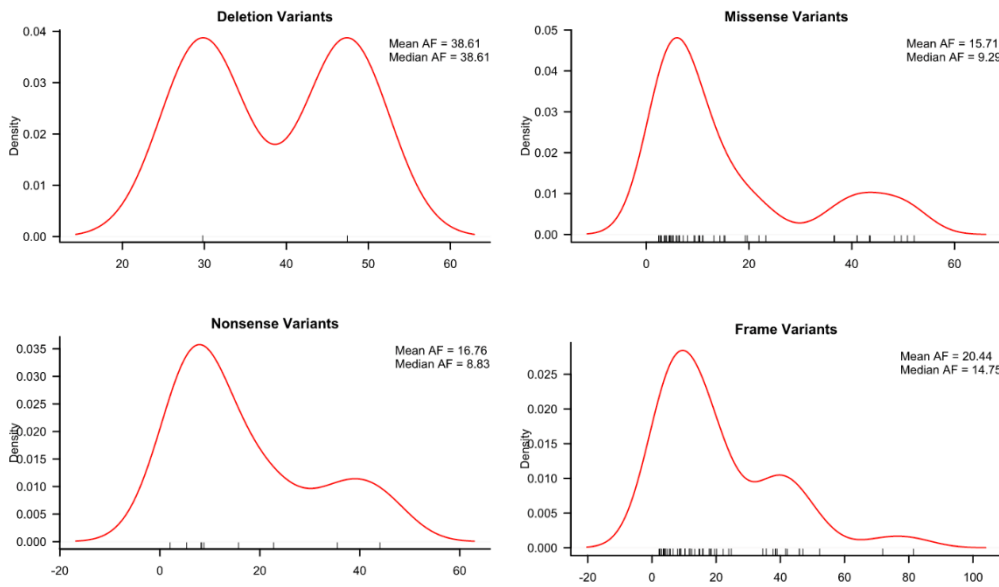

**Figure S3. Mutational spectrum of all detected somatic mutations in patients with Waldenström Macroglobulinemia.** A) Number of patients harboring mutations in 1, 2, 3, 4 and 5 different genes. (B) The total number of patients harboring one or more mutations in each gene. (C) The maximum VAF attained by each of the 258 patients with a somatic mutation. (D) The maximum VAF attained by each of the 81 patients with CH.

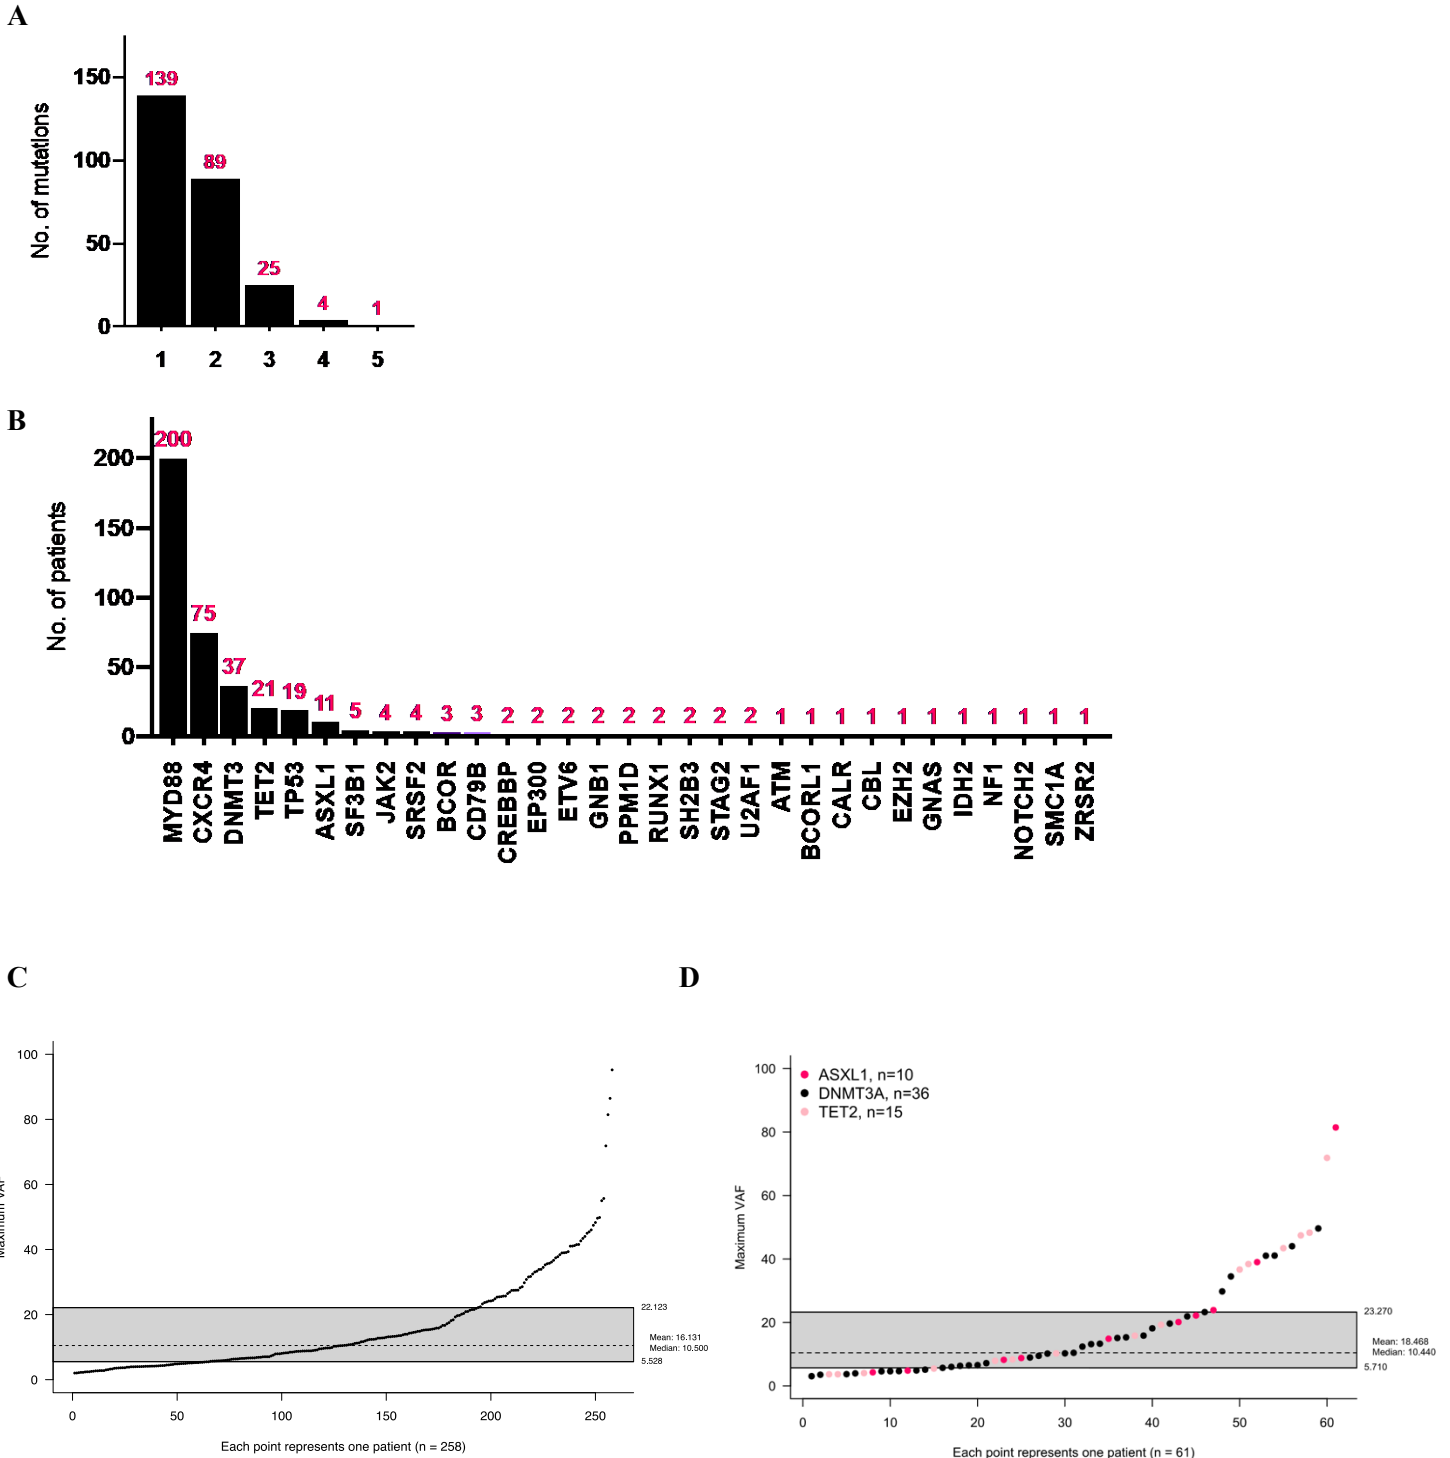

**Figure S4. Correlation BM infiltration and *MYD88* status with CH-DTA detection in Waldenstrom Macroglobulinemia patients.** (A) Barplot comparing detected plasma cell percentage in BM biopsies of patients with and without a CH-DTA mutation detected. Shown for the complete cohort of WM patients (left) and for the symptomatic WM patients only (right). (B) Barplot comparing detected plasma cell percentage in BM aspirates of patients with and without a CH-DTA mutation detected. Shown for the complete cohort of WM patients (left) and for the symptomatic WM patients only (right). (C) Frequency of CH-DTA mutations according to *MYD88* mutational status as detected with PCR.

A

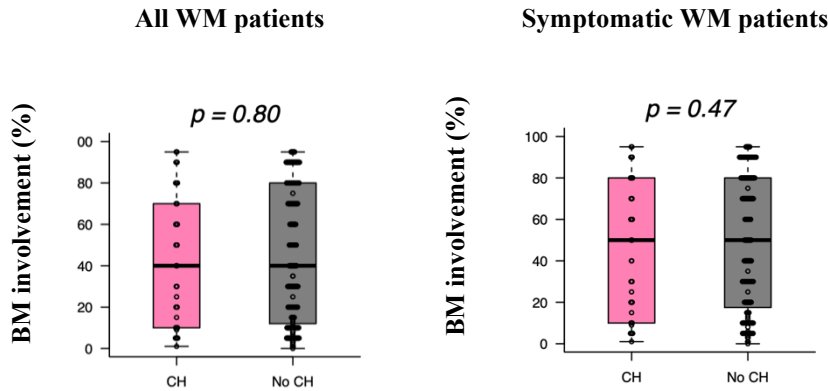

B

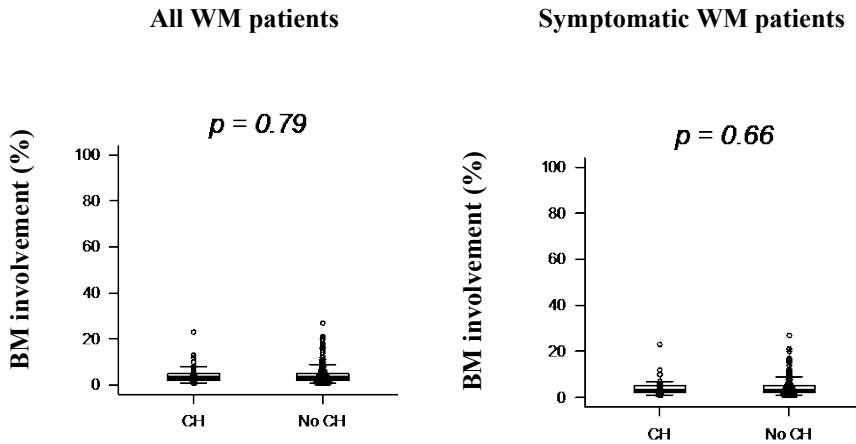

C

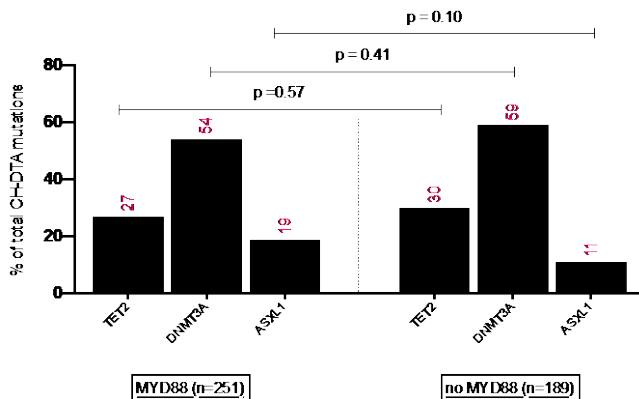

**Figure S5. Mutational spectrum in patients with IgM MGUS and smoldering Waldenström Macroglobulinemia.** (A) The total number of IgM MGUS and SWM patients harboring one or more mutations in each gene. (B) Number of IgM MGUS and SWM patients harboring mutations in 1 gene. (C) Mutation frequency of MYD88 and CXCR4 mutations per disease stage. (D) The maximum VAF attained by each of the 81 patients with a somatic mutation. (E) The maximum VAF attained by each of the 20 patients with CH.

**A**

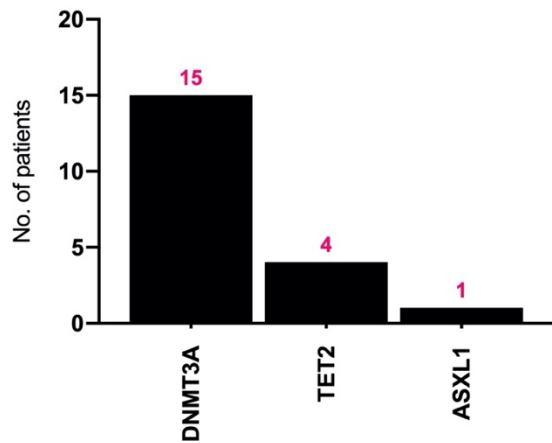

**B**

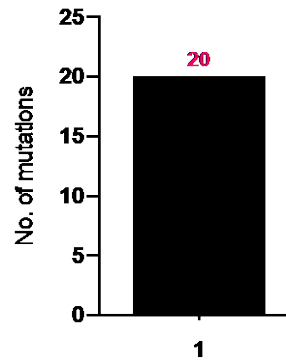

**C**

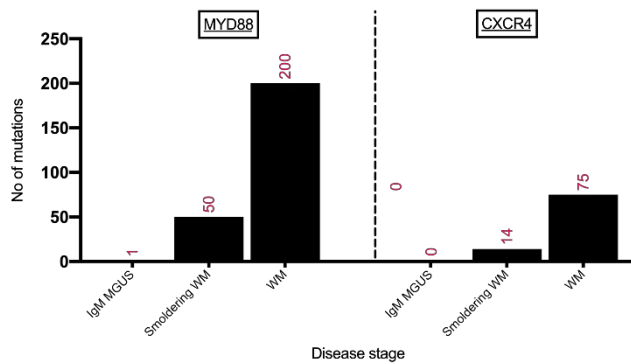

**D**

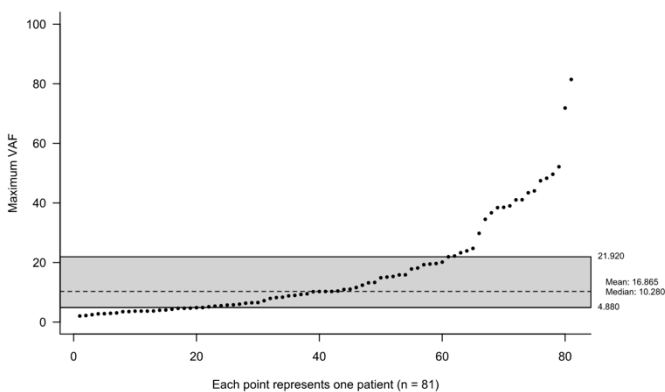

**E**

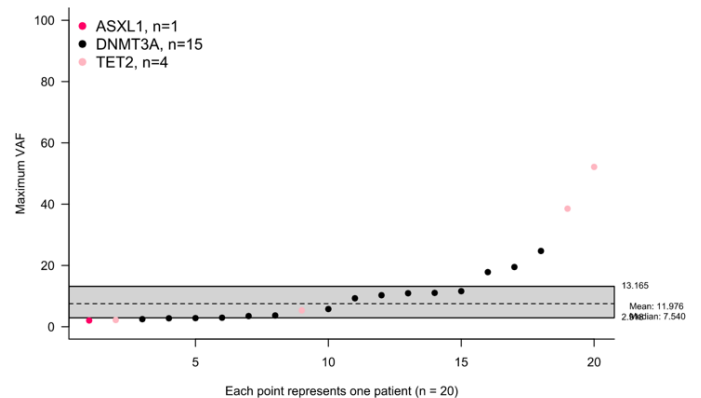



**Figure S6 CH dynamics.** Heatmaps for the clonal dynamics of 23 WM patients with >1 NGS test and any detected mutation (mutations with VAF <2% are also depicted). Each row in the heatmap is a single mutation; each column is one NSG assay timepoint. The right legend denotes the VAF detected, with darker shades of pink indicating higher VAF. Values within each square depict VAF detected. The legend below the heatmaps indicate the timepoint relative to the NSG date in months and the given therapy at that timepoint. (A) Heatmaps for patients that did not receive therapy or received chemotherapy-free regimens. (B) Heatmaps for patients that received at least one chemotherapy-consisting regimen.

A.

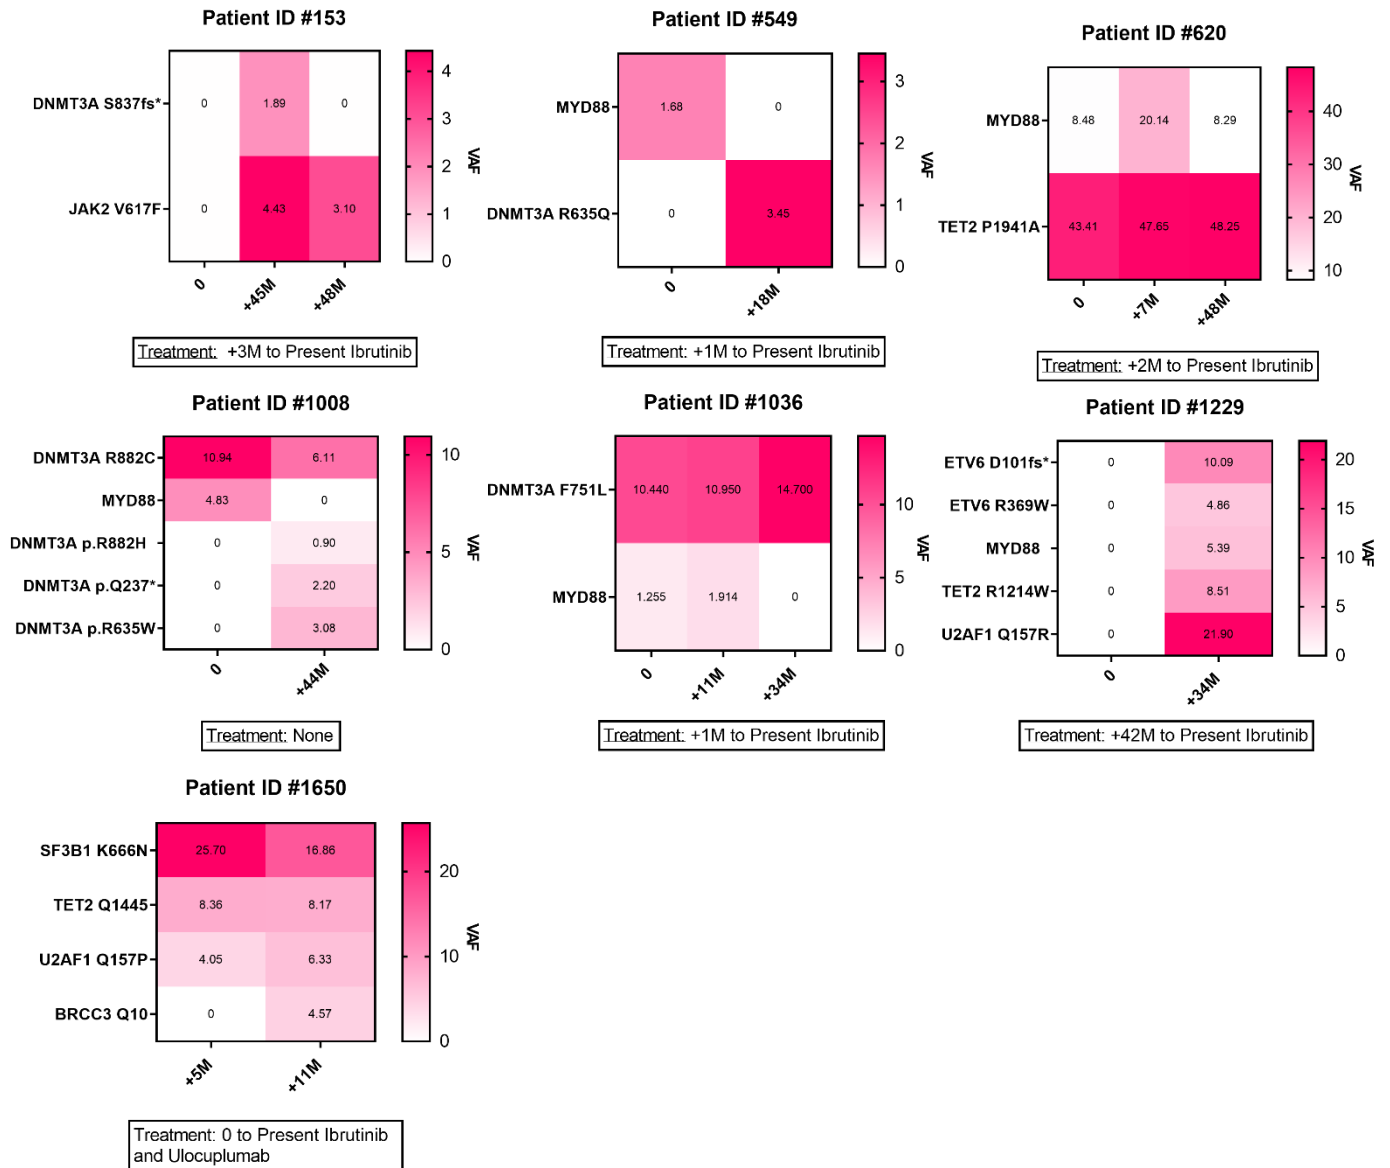

**B.**

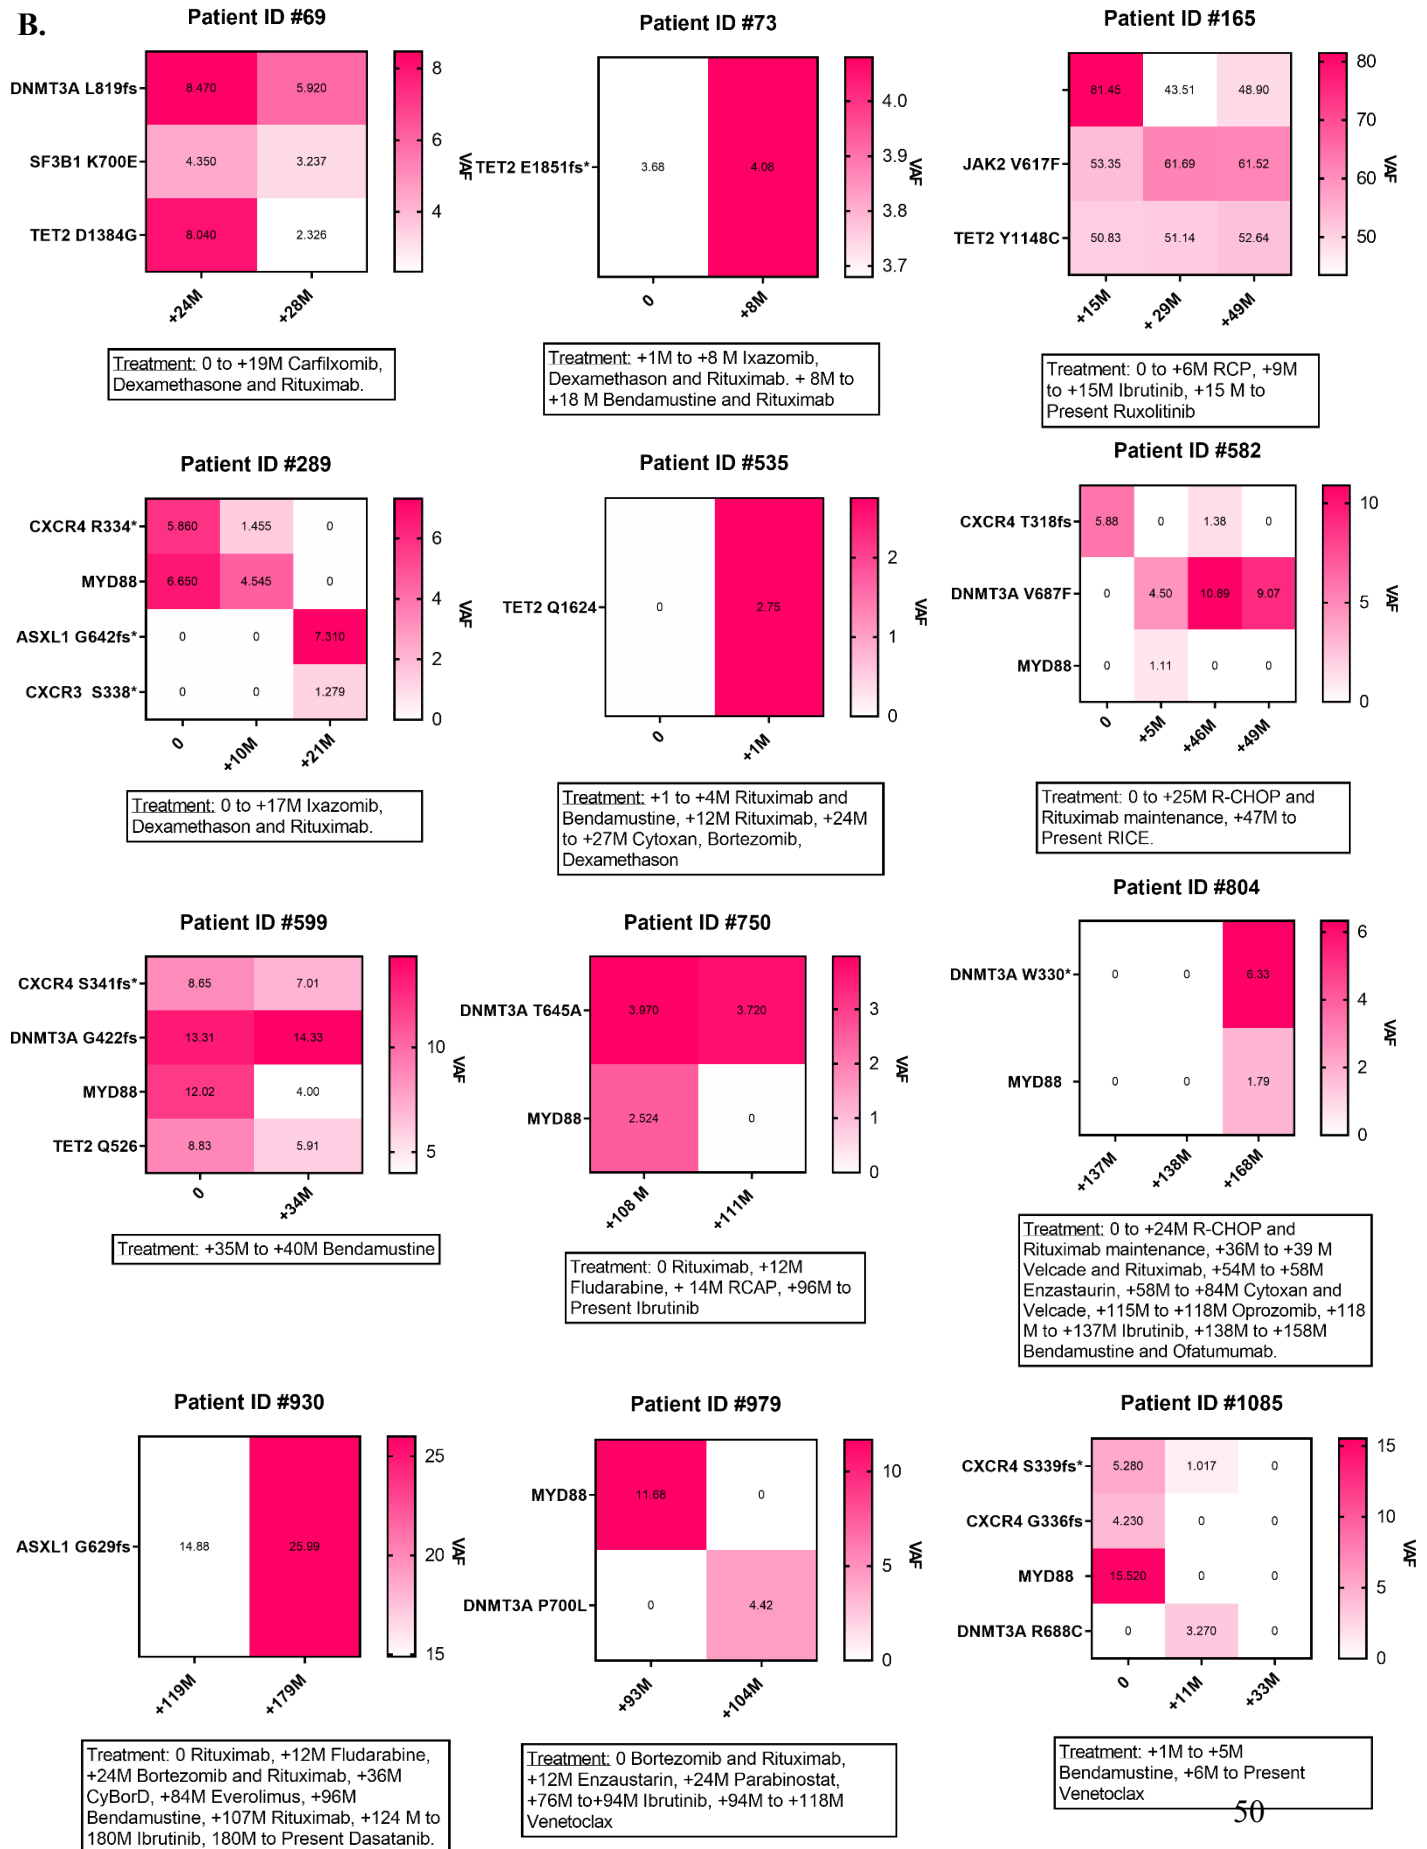

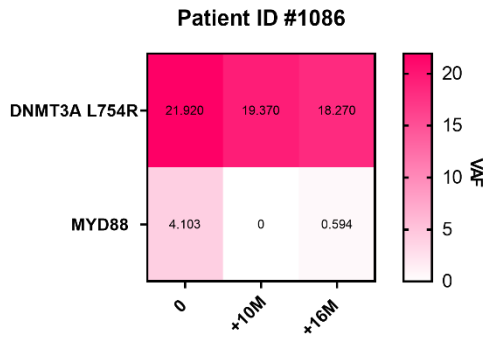

Treatment: 0 to +3M 2017 CDR, +3M to +6M Ibrutinib, +7M to Present Venetoclax

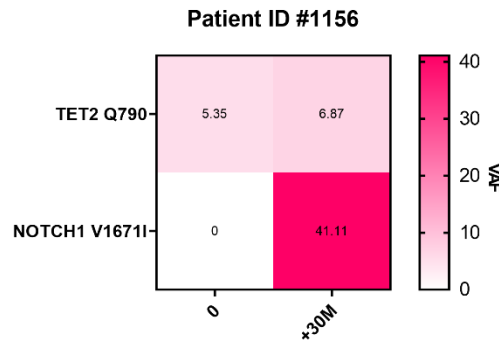

Treatment: +24M to Present Bendamustine and Rituximab

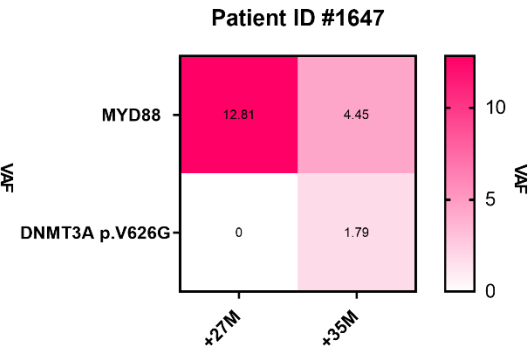

Treatment: 0 to 20M Rituximab, +23M to +27M Bortezomib and Dexamethason, +28M to +31M Umbralisib, +35M to Present Zanubrutinib.

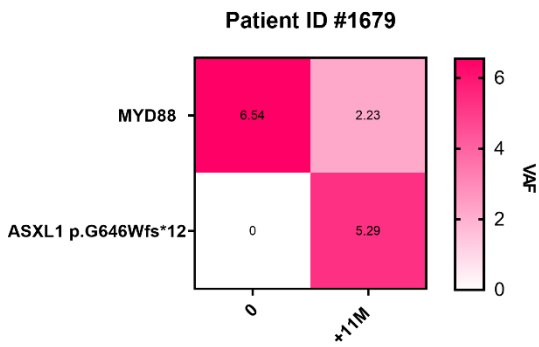

Treatment: 0 to +3M Carfilzomib, Dexamethason and Ofatumumab, +5M to Present Ibrutinib

**Figure S7. Mutational spectrum and characteristics of patients with Waldenström Macroglobulinemia and MDS and/or AML.** (A) The total number of WM patients that develop MDS or AML harboring one or more mutations in each gene. (B) Clonal dynamics of detected mutations before and after therapy with bendamustine and rituximab in a WM patient that developed MDS. Values depicted in each square represent VAF. (C) Number of patients receiving therapy. D) Co-mutation plot showing mutations present in all 15 patients that develop MDS or AML; each column represents a single patient. The top row denotes the maximum VAF in each patient, with darker shades of pink indicating higher VAF. The bar graph on the right designates the proportion of the different mutation subtypes for each gene. *B(D)R*: Bortezomib, dexamethasone, rituximab. *C(D)R*: cyclophosphamide, dexamethasone, rituximab.

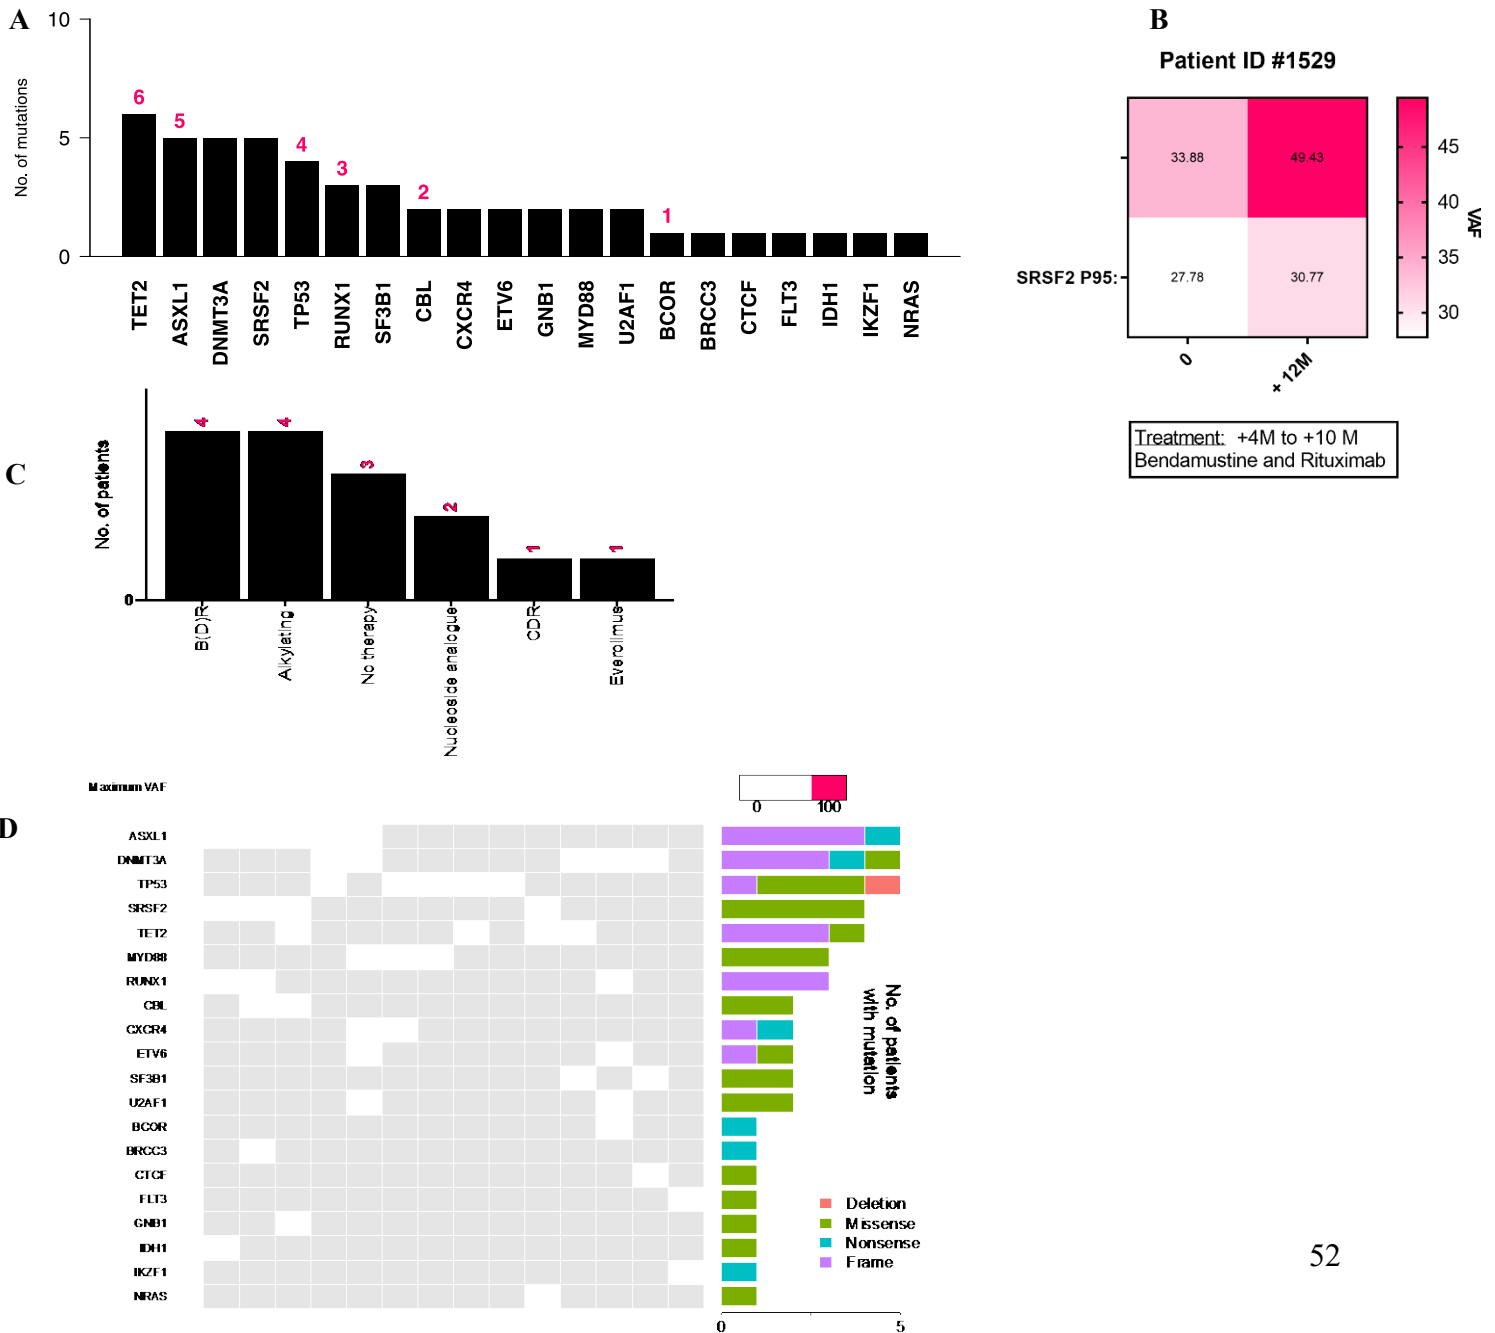

**Figure S8. Mutational spectrum of CH in Waldenström Macroglobulinemia patients with *TP53* mutations.** (A) OS and (B) PFS among patients with *TP53* mutations versus those without *TP53* mutations from time of diagnosis. (C) Co-mutation plot showing mutations present in all 26 *TP53* mutated patients: each column represents a single patient. The top row denotes the maximum VAF in each patient, with darker shades of pink indicating higher VAF. The bar graph on the right designates the number of patients with a mutation detected in each gene.

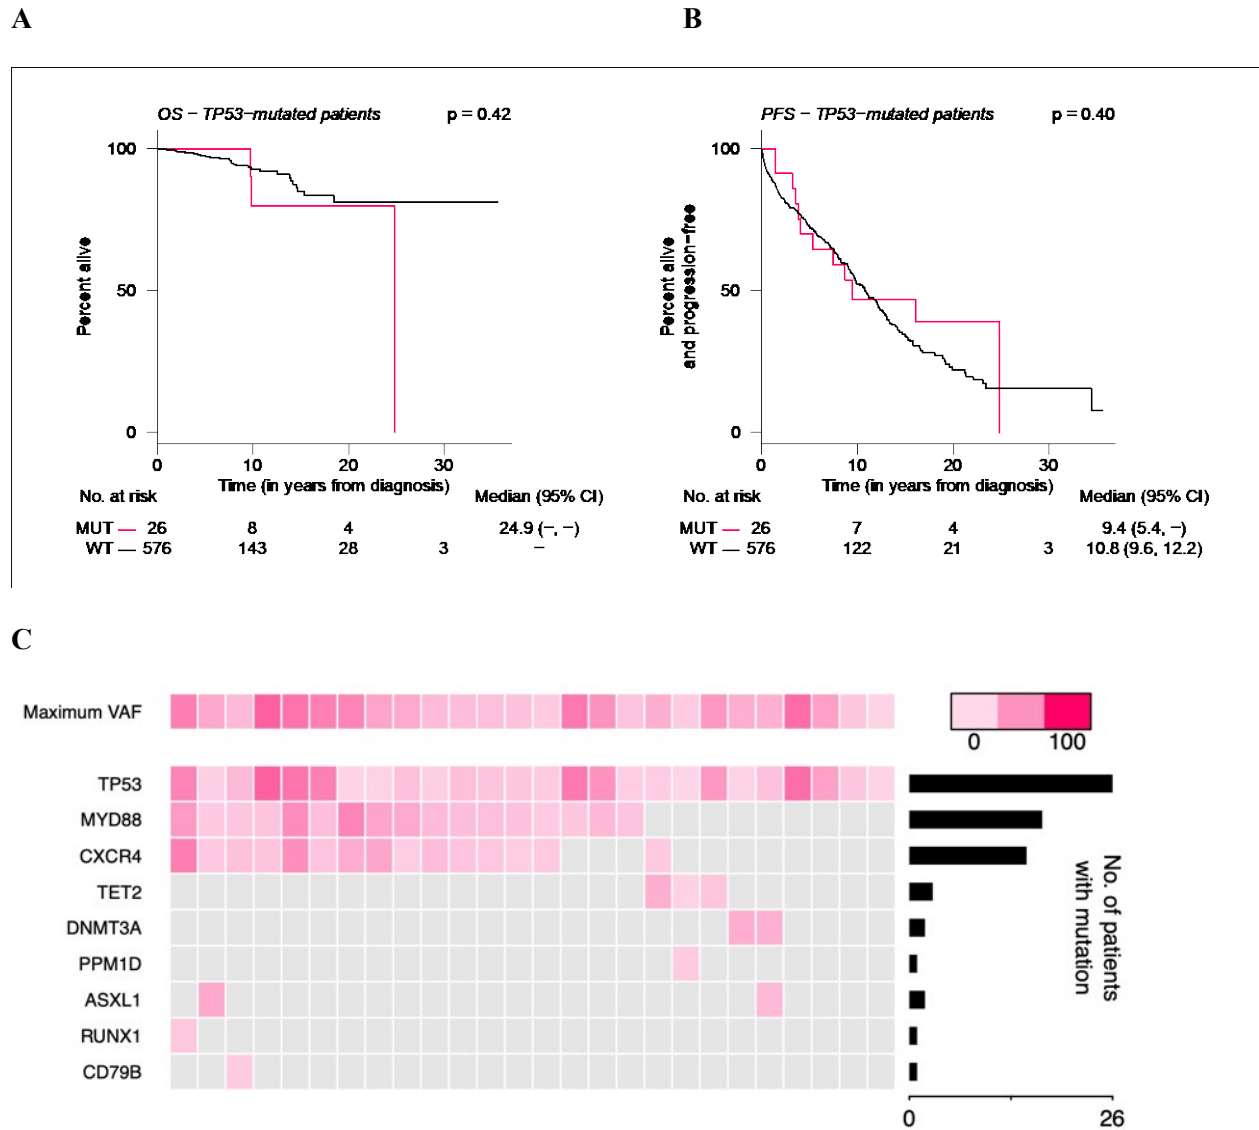

Supplement: advancesADV2021004926-suppl1.pdf [file advancesADV2021004926-suppl1.pdf]
